# Supplementary material for: Epidemiological profile of SARS-CoV-2 among selected regions in Ghana: A cross-sectional retrospective study
Source: PLoS One. 2020 Dec 10;15(12):e0243711. doi: 10.1371/journal.pone.0243711 (PMC7728229; doi:10.1371/journal.pone.0243711)
Supplement: S1 File — (XLSX) [file pone.0243711.s001.xlsx]

## Sheet: Sheet1
No.	Lab ID	Sex	Age_years	Age_months	Age_days	Region	Symptoms	PCR_CoV	Cycle_Threshold	Country_origin
1	KCCR/KNUSTH-001	M	-999			ASHANTI	high grade fever, altered consciousness, dead	negative	-999	Foreigner
2	KCCR/KNUSTH-002	F	39			ASHANTI	no symptoms	negative	-999	Foreigner
3	KCCR/KNUSTH-003	F	35			ASHANTI	no symptoms	negative	-999	Foreigner
4	KCCR/KSH-001	F	2			ASHANTI	high grade fever, diarrhoeal stool, rhinorrhea,general weakness, irritability,	negative	-999	Ghanaian
5	KCCR/KATH-001	F	37			ASHANTI	cough	negative	-999	Ghanaian
6	KCCR/BR-001	M	41			BONO	cough	negative	-999	Ghanaian
7	KCCR/KNUSTH-004	-999	-999			ASHANTI	history of fever, general weakness, cough, sore throat	negative	-999	Foreigner
8	KCCR/UPE-001	F	49			UPPER EAST	history of fever, general weakness, diarrhoea, nausea, headache, abdominal pain	negative	-999	Ghanaian
9	KCCR/AGO-001	M	55			ASHANTI	cough, sore throat, runny nose, headache, muscular pain	negative	-999	Foreigner
10	KCCR/AGO-002	M	56			ASHANTI	history of fever, general weakness, headache	POSITIVE	-999	Ghanaian
11	KCCR/KSH-002	M	38			ASHANTI	history of fever,cough, sore throat, headache	negative	-999	Ghanaian
12	KCCR/KSH-003	F	-999			ASHANTI	no symptoms	negative	-999	Ghanaian
13	KCCR/KNUSTH-005	M	33			ASHANTI	cough, muscular pain	negative	-999	Ghanaian
14	KCCR/AGO-003	M	51			ASHANTI	cough, runny nose	negative	-999	Foreigner
15	KCCR/KSH-006	F	27			ASHANTI	general weakness, cough, sore throat, runny nose, headache	negative	-999	Ghanaian
16	KCCR/KSH-009	M	32			ASHANTI	general weakness, cough, headache, history of fever, irritability	negative	-999	Ghanaian
17	KCCR/KATH-002	M	54			ASHANTI	cough	negative	-999	Foreigner
18	KCCR/KATH-003	M	60			ASHANTI	cough	negative	-999	Foreigner
19	KCCR/KATH-004	M	42			ASHANTI	no symptoms	negative	-999	Ghanaian
20	KCCR/KATH-005	F	39			ASHANTI	no symptoms	negative	-999	Foreigner
21	KCCR/KATH-006	M	52			ASHANTI	no symptoms	negative	-999	Foreigner
22	KCCR/KATH-007	M	36			ASHANTI	no symptoms	negative	-999	Foreigner
23	KCCR/KATH-008	F	53			ASHANTI	no symptoms	negative	-999	Ghanaian
24	KCCR/KATH-009	M	35			ASHANTI	no symptoms	negative	-999
25	KCCR/KATH-010	M	23			ASHANTI	history of fever, cough, sore throat	negative	-999	Ghanaian
26	KCCR/KSH-004	M	34			ASHANTI	cough, sore throat, runny nose, headache, muscular pain	negative	-999	Ghanaian
27	KCCR/KSH-005	M	26			ASHANTI	history of fever, general weakness, cough, sore throat, runny nose, diarhoea, nausea/vomiting, headache	negative	-999	Ghanaian
28	KCCR/KSH-006_B	F	59			ASHANTI	history of fever, general weakness, cough, runny nose	POSITIVE	-999	Ghanaian
29	KCCR/KATH-012	M	61			ASHANTI	history of fever, cough	POSITIVE	-999	Foreigner
30	KCCR/KATH-011	F	22			ASHANTI	sore throat, runny nose, shortness of breath, headache, painful throat radiating to the ears	negative	-999	Ghanaian
31	KCCR/AGO-004	M	37			ASHANTI	general weakness, sore throat, headache, muscular pain	negative	-999	Ghanaian
32	KCCR/AGO-005	F	17			ASHANTI	history of fever, general weakness, cough, sore throat, headache, muscular pain	negative	-999	Ghanaian
33	KCCR/KSH-010	F	59			ASHANTI	history of fever, general weakness, cough, sore throat, shortness of breath, diarrhoea, nausea/vomiting, headache	negative	-999	Foreigner
34	KCCR/KSH-007	M	26			ASHANTI	history of fever, general weakness, cough, sore throat, shortness of breath, nausea/vomiting, headache, muscular pain, joint pain, chest pain	negative	-999	Ghanaian
35	KCCR/KNUSTH-011	M	61			ASHANTI	history of fever, sore throat	negative	-999	Ghanaian
36	KCCR/KSH-011	M	27			ASHANTI	history of fever, general weakness, sore throat	POSITIVE	-999	Foreigner
37	KCCR/KSH-012	M	33			ASHANTI	history of fever, sore throat, headache	negative	-999	Ghanaian
38	KCCR/KSH-013	M	18			ASHANTI	sore throat, runny nose, shortness of breath, headache	negative	-999	Ghanaian
39	KCCR/KSH-014	M	45			ASHANTI	history of fever, general weakness, headache,	negative	-999	Ghanaian
40	KCCR/KSH-015	M	26			ASHANTI	history of fever, cough	negative	-999	Ghanaian
41	KCCR/KATH-013	F	39			ASHANTI	cough, shortness of breath	negative	-999	Ghanaian
42	KCCR/KATH-014	F	50			ASHANTI	cough, shortness of breath	negative	-999	Ghanaian
43	KCCR/KATH-015	M	49			ASHANTI	cough, throat irritation	negative	-999	Ghanaian
44	KCCR/KATH-016	F	-999			ASHANTI	cough, sore throat, runny nose, headache, muscular pain, abdominal pain	negative	-999	Ghanaian
45	KCCR/KSH-016	F	29			ASHANTI	cough, runny nose, shortness of breath, headache	negative	-999	Ghanaian
46	KCCR/UPW-001	M	52			UPPER WEST	history of fever, general weakness	negative	-999	Ghanaian
47	KCCR/KATH-019	M	34			ASHANTI	history of fever, general weakness, sore throat, runny nose, shortness of breath, headache, abdominal pain, neck pain	negative	-999	Ghanaian
48	KCCR/KATH-017	M	37			ASHANTI	general weakness, cough, runny nose, headache, joint pains	negative	-999	Ghanaian
49	KCCR/KATH-018	M	43			ASHANTI	history of fever, sore throat, runny nose	negative	-999	Ghanaian
50	KCCR/KNUSTH-013	M	-999			ASHANTI	no symptoms	negative	-999	Ghanaian
51	KCCR/KNUSTH-012	M	31			ASHANTI	cough, sore throat, shortness of breath, chest pain	negative	-999	Ghanaian
52	KCCR/KNUSTH-010	F	-999			ASHANTI	no symptoms	negative	-999	Ghanaian
53	KCCR/KSH-017	F	37			ASHANTI	history of fever, cough, shortness of breath, headache, muscular pains	negative	-999	Ghanaian
54	KCCR/KSH-018	M	65			ASHANTI	history of fever, general weakness, cough, sore throat, runny nose, headache, chest pains	negative	-999	Ghanaian
55	KCCR/KSH-019	F	6			ASHANTI	history of fever, general weakness, cough, runny nose, shortness of breath, nausea/vomiting, headache	negative	-999	Ghanaian
56	KCCR/AGO-006	M	53			ASHANTI	general weakness, cough, sore throat, headache	negative	-999
57	KCCR/AGO-007	M	36			ASHANTI	history of fever, general weakness, cough, headache, muscular pains	negative	-999	Ghanaian
58	KCCR/KATH-020	M	64			ASHANTI	general weakness, cough, abdominal pain	negative	-999	Ghanaian
59	KCCR/BR-002	M	31			BONO	history of fever, general weakness, cough, shortness of breath, irritability/confusion, chest pain	negative	-999	Ghanaian
60	KCCR/SR-001	-999	-999			SAVANNAH	cough	negative	-999	Ghanaian
61	KCCR/KATH-021	M	34			ASHANTI	cough, muscular pain	negative	-999	Ghanaian
62	KCCR/KATH-022	F	31			ASHANTI	general weakness, cough, runny nose, nausea, headache	negative	-999	Ghanaian
63	KCCR/KATH-023	M	83			ASHANTI	shortness of breath	POSITIVE	-999	Ghanaian
64	KCCR/UPE-002	M	36			UPPER EAST	history of fever, general weakness, cough, sore throat, shortness of breath	negative	-999	Ghanaian
65	KCCR/AHF-001	F	25			AHAFO	cough, chest pain	negative	-999	Ghanaian
66	KCCR/BAB-001	M	25			WESTERN NORTH	cough, headache	negative	-999	Ghanaian
67	KCCR/MHA-001	F	35			ASHANTI	cough	negative	-999	Ghanaian
68	KCCR/AGO-008	F	32			ASHANTI	sore throat, headache	negative	-999	Ghanaian
69	KCCR/AGO-009	F	24	999	999	ASHANTI	sore throat, headache	negative	999	Ghanaian
70	KCCR/AGO-010	F	23			ASHANTI	sore throat, headache	negative	-999	Ghanaian
71	KCCR/AGO-011	F	37			ASHANTI	sore throat, headache	negative	-999	Ghanaian
72	KCCR/KSH-020	M	28			ASHANTI	history of fever, general weakness, cough, runny nose	negative	-999	Ghanaian
73	KCCR/KSH-021	F	60			ASHANTI	history of fever, general wekness, cough, shortness of breath	negative	-999	Ghanaian
74	KCCR/KSH-022	F	39			ASHANTI	history of fever, general weakness, cough, diarrhoea, headache	negative	-999	Foreigner
75	KCCR/KSH-023	M	21			ASHANTI	cough, headache	negative	-999	Ghanaian
76	KCCR/KSH-024	M	42			ASHANTI	history of fever, sore throat, shortness of breath, headache	negative	-999	Ghanaian
77	KCCR/KATH-025	M	23			ASHANTI	history of fever, general weakness, cough, sore throat, runny nose, shortness of breath, headache, muscular pain	negative	-999	Ghanaian
78	KCCR/KATH-026	F	34			ASHANTI	general weakness, sore throat	negative	-999	Ghanaian
79	KCCR/KATH-027	F	32			ASHANTI	cough, headache	negative	-999	Ghanaian
80	KCCR/KATH-028	F	17			ASHANTI	history of fever, cough, runny nose	negative	-999	Ghanaian
81	KCCR/KATH-029	M	48			ASHANTI	history of fever, cough, shortness of breath	negative	-999	Ghanaian
82	KCCR/KATH-030	M	30			ASHANTI	shortness of breath	negative	-999	Ghanaian
83	KCCR/KATH-031	F	38			ASHANTI	diarrhoea, sneezing	negative	-999	Ghanaian
84	KCCR/KATH-032	M	25			ASHANTI	general weakness, nausea, abominal pain	negative	-999	Ghanaian
85	KCCR/KATH-033	F	33			ASHANTI	sore throat, headache	negative	-999	Ghanaian
86	KCCR/KSH-025	F	32			ASHANTI	history of fever, general weakness,cough, shortness of breath	negative	-999	Ghanaian
87	KCCR/BE-001	M	23			BONO EAST	cough, sore throat, runny nose, chest pain	negative	-999	Ghanaian
88	KCCR/KATH-034	F	33			ASHANTI	runny nose	negative	-999	Ghanaian
89	KCCR/KATH-035	F	19			ASHANTI	cough, sore throat, runny nose	negative	-999	Ghanaian
90	KCCR/KATH-036	F	41			ASHANTI	cough, shortness of breath, headache	negative	-999	Ghanaian
91	KCCR/KATH-037	M	27			ASHANTI	shortness of breath	negative	-999	Ghanaian
92	KCCR/KATH-038	F	34			ASHANTI	cough, sore throat, runny nose, shortnes of breath	negative	-999	Ghanaian
93	KCCR/KATH-039	F	24			ASHANTI	cough, runny nose, shortness of breath	negative	-999	Ghanaian
94	KCCR/KSH-026	F	41			ASHANTI	history of fever, general weakness, coughnausea/vomiting, chest pain	negative	-999	Ghanaian
95	KCCR/KSH-027	M	61			ASHANTI	history of fever, cough, shortness of breath, chest pain	negative	-999	Ghanaian
96	KCCR/KSH-028	M	20			ASHANTI	cough, headache	negative	-999	Ghanaian
97	KCCR/KSH-029	M	2			ASHANTI	cough, shortness of breath	negative	-999	Ghanaian
98	KCCR/KSH-030	F	35			ASHANTI	history of fever, cough, soe throat, runny nose, shortness of breath, headache	negative	-999	Ghanaian
99	KCCR/BAB-002	M	69			WESTERN NORTH	cough, runny nose	negative	-999	Ghanaian
100	KCCR/UPE-003	M	46			UPPER EAST	history of fever, general weakness, cough, sore throat, shortness of breath, headache, irritability, chest pains, joint pains	negative	-999	Ghanaian
101	KCCR/AGO-012	M	41			ASHANTI	cough, sore throat, runny nose	negative	-999	Ghanaian
102	KCCR/AGO-013	M	42			ASHANTI	no symptoms	negative	-999	Ghanaian
103	KCCR/AGO-014	F	43			ASHANTI	no symptoms	negative	-999	Ghanaian
104	KCCR/AGO-015	M	44			ASHANTI	no symptoms	negative	-999	Ghanaian
105	KCCR/AGO-016	M	25			ASHANTI	history of fever	negative	-999	Ghanaian
106	KCCR/AGO-017	M	38			ASHANTI	cough, sore throat	negative	-999	Ghanaian
107	KCCR/KSH-031	M	68			ASHANTI	cough, runny nose, shortness of breath	negative	-999	Ghanaian
108	KCCR/KSH-032	M	9			ASHANTI	history of fever, general weakness, cough, runny nose, muscular pain	negative	-999	Ghanaian
109	KCCR/KSH-033	F	40			ASHANTI	cough, sore throat, shortness of breath, nausea/vomiting	negative	-999	Ghanaian
110	KCCR/KSH-034	M	28			ASHANTI	history of fever, general weakness, cough, sore throat, headache	negative	-999	Ghanaian
111	KCCR/KSH-035	M	49			ASHANTI	runny nose	negative	-999	Ghanaian
112	KCCR/KSH-036	F	51			ASHANTI	cough, sore throat, runny nose, headache	POSITIVE	-999	Ghanaian
113	KCCR/KSH-037	M	36			ASHANTI	history of fever, general weakness, cough, sore throat, runny nose, shortness of breath, headache	negative	-999	Ghanaian
114	KCCR/KNUSTH-016	M	26			ASHANTI	sore throat	negative	-999	Ghanaian
115	KCCR/KNUSTH-017	M	45			ASHANTI	no symptoms	negative	-999	Ghanaian
116	KCCR/KNUSTH-015	M	40			ASHANTI	history of fever, cough	negative	-999	Ghanaian
117	KCCR/KNUSTH-014	F	28			ASHANTI	no symptoms	negative	-999	Ghanaian
118	KCCR/KATH-041	F	65			ASHANTI	shortness of breath, headache	negative	-999	Ghanaian
119	KCCR/KATH-042	M	26			ASHANTI	history of fever, cough, sore throat, runny nose, shortness of breath	negative	-999	Ghanaian
120	KCCR/KATH-043	M	48			ASHANTI	history of fever, general weakness, cough	negative	-999	Ghanaian
121	KCCR/KATH-044	F	18			ASHANTI	history of fever, cough	negative	-999	Ghanaian
122	KCCR/KATH-045	F	26			ASHANTI	cough, shortness of breath	negative	-999	Ghanaian
123	KCCR/KATH-046	F	30			ASHANTI	cough, shortness of brreath, chest pains	negative	-999	Ghanaian
124	KCCR/KATH-040	F	63			ASHANTI	history of fever, general weakness, shortness of breath, abdominal pains	negative	-999	Ghanaian
125	KCCR/NER-001	M	21			NORTH EAST	history of fever, general weakness, cough, runny nose, headache	negative	-999	Ghanaian
126	KCCR/KATH-047	F	35			ASHANTI	cough, runny nose, shortness of breath	negative	-999	Ghanaian
127	KCCR/KATH-048	M	68			ASHANTI	cough, sore throat, shortness of breath	negative	-999	Ghanaian
128	KCCR/KATH-049	F	29			ASHANTI	history of fever, runny nose	negative	-999	Ghanaian
129	KCCR/KATH-050	F	13			ASHANTI	cough, runny nose, sore throat	negative	-999	Ghanaian
130	KCCR/KATH-051	F	27			ASHANTI	cough, shortness of breath, vomiting, headache	negative	-999	Ghanaian
131	KCCR/TTH-001	-999	-999			NORTHERN	general weakness, cough, sore throat, runny nose, diarrhoea, muscular pain	negative	-999	Ghanaian
132	KCCR/TTH-002	-999	-999			NORTHERN	sore throat, muscular pain	negative	-999	Ghanaian
133	KCCR/TTH-003	-999	-999			NORTHERN	cough, sore throat, shortness of breath, irritability/confusion	negative	-999	Ghanaian
134	KCCR/KATH-053	M	37			ASHANTI	cough	negative	-999	Ghanaian
135	KCCR/KATH-054	M	62			ASHANTI	history of fever, sore throat, shortness of breath	negative	-999	Ghanaian
136	KCCR/KATH-055	M	50			ASHANTI	history of fever, cough, sore throat, runny nose, shortness of breath	negative	-999	Ghanaian
137	KCCR/KATH-056	F	30			ASHANTI	general weakness, shortness of breath	negative	-999	Ghanaian
138	KCCR/KATH-052	F	82			ASHANTI	history of fever, shortness of breath, chest pains	negative	-999
139	KCCR/UPW-002	M	42			UPPER WEST	throat irritation	POSITIVE	-999	Ghanaian
140	KCCR/UPW-003	M	21			UPPER WEST	history of fever, cough	negative	-999	Ghanaian
141	KCCR/KSH-038	M	26			ASHANTI	history of fever, cough, sore throat, shortness of breath, diarrhoea, nausea, headache, abdominal pains	negative	-999	Ghanaian
142	KCCR/KSH-039	F	26			ASHANTI	history of fever, general weakness, cough, sore throat, runny nose, headache	negative	-999	Ghanaian
143	KCCR/KSH-040	F	26			ASHANTI	history of fever, general weakness, cough, sore throat, runny nose, headache	negative	-999	Ghanaian
144	KCCR/KSH-041	F	22			ASHANTI	history of fever, general weakness, cough, sore throat, runny nose, headache	negative	-999	Ghanaian
145	KCCR/KSH-042	F	25			ASHANTI	general weakness, cough, sore throat, shortness of breath	negative	-999	Ghanaian
146	KCCR/KSH-043	M	22			ASHANTI	general weakness, cough, sore throat, shortness of breath, headache	negative	-999	Ghanaian
147	KCCR/KNUSTH-018	F	19			ASHANTI	cough, runny nose	negative	-999	Ghanaian
148	KCCR/KNUSTH-019	M	35			ASHANTI	cough, runny nose	negative	-999	Ghanaian
149	KCCR/KNUSTH-020	F	-999			ASHANTI	history of fever, runny nose, shortness of breath, headache, cough	negative	-999	Ghanaian
150	KCCR/AGO-018	M	33			ASHANTI	history of fever, cough, sore throat, muscular pain	negative	-999	Foreigner
151	KCCR/AGO-020	M	55			ASHANTI	general weakness, shortness of breath, abdominal pain	negative	-999	Ghanaian
152	KCCR/AGO-021	F	36			ASHANTI	runny nose, headache	negative	-999
153	KCCR/AGO-022	M	23			ASHANTI	no symptoms	negative	-999	Ghanaian
154	KCCR/AGO-023	M	36			ASHANTI	no symptoms	negative	-999	Foreigner
155	KCCR/AGO-024	M	41			ASHANTI	no symptoms	negative	-999	Foreigner
156	KCCR/AGO-025	M	26			ASHANTI	no symptoms	negative	-999	Ghanaian
157	KCCR/KNUSTH-021	M	41			ASHANTI	history of fever, sore throat, runny nose, shortness of breath	negative	-999	Ghanaian
158	KCCR/CEN-001	M	35			CENTRAL	cough, shortness of breath, chest pain	negative	-999	Ghanaian
159	KCCR/BE-002	M	25			BONO EAST	history of fever, cough,diarrhoea	negative	-999	Ghanaian
160	KCCR/BE-003	M	38			BONO EAST	history of fever, general weakness, runny nose, headache	negative	-999	Ghanaian
161	KCCR/KSH-044	F	60			ASHANTI	general weakness, cough, sore throat, shortness of breath, diarrhoea, nausea/vomiting, headache, abdominal pain	negative	-999	Ghanaian
162	KCCR/KSH-045	M	29			ASHANTI	history of fever, shortness of breath	negative	-999	Ghanaian
163	KCCR/KSH-046	F	29			ASHANTI	general weakness, cough, diarrhoea, runny nose, headache	negative	-999	Ghanaian
164	KCCR/KSH-047	M	49			ASHANTI	history of fever, general weakness	negative	-999	Foreigner
165	KCCR/KSH-048	M	40			ASHANTI	history of fever, general weakness, cough,shortness of breath, chest pains, abominal pains	negative	-999	Ghanaian
166	KCCR/KATH-059	F	27			ASHANTI	history of fever, sore throat, headache	negative	-999	Ghanaian
167	KCCR/KATH-060	M	48			ASHANTI	history of fever, cough, shortness of breath	negative	-999	Ghanaian
168	KCCR/KATH-061	F	31			ASHANTI	history of fever, general weakness, cough, muscular pain	negative	-999	Ghanaian
169	KCCR/UPE-004	M	43			UPPER EAST	general weakness, muscular pain	negative	-999	Ghanaian
170	KCCR/UPE-005	M	25			UPPER EAST	no symptom	negative	-999	Ghanaian
171	KCCR/UPE-006	M	45			UPPER EAST	no symptom	negative	-999	Ghanaian
172	KCCR/UPE-007	M	19			UPPER EAST	history of fever, general weakness, cough,shortness of breath, nausea	negative	-999	Ghanaian
173	KCCR/KATH-057	M	38			ASHANTI	cough, runny nose, shortness of breath	negative	-999	Ghanaian
174	KCCR/KATH-058	M	64			ASHANTI	history of fever, general weakness, shortness of breath	negative	-999	Ghanaian
175	KCCR/KATH-062	M	38			ASHANTI	history of fever, cough, sore throat, shortness of breath	negative	-999	Ghanaian
176	KCCR/KATH-063	M	41			ASHANTI	no symptoms	negative	-999	Ghanaian
177	KCCR/KATH-064	F	29			ASHANTI	cough, shortness of breath, muscular pain, chest pain	negative	-999	Ghanaian
178	KCCR/KATH-065	F	42			ASHANTI	history of fever, sore throat	negative	-999	Ghanaian
179	KCCR/KATH-066	M	31			ASHANTI	runny nose, headache, diarrhoea	negative	-999	Ghanaian
180	KCCR/KATH-067	F	42			ASHANTI	history of fever, muscular pain	negative	-999	Ghanaian
181	KCCR/CEN-002	M	25			CENTRAL	history of fever, general weakness, cough,headache	negative	-999	Ghanaian
182	KCCR/CEN-003	M	23			CENTRAL	general weakness, cough, sore throat, shortness of breath, diarrhoea, headache	negative	-999	Ghanaian
183	KCCR/CEN-004	M	40			CENTRAL	history of fever, shortness of breath	negative	-999	Ghanaian
184	KCCR/KNUSTH-022	M	-999			ASHANTI	history of fever, sore throat,	negative	-999	Ghanaian
185	KCCR/4MD-001	M	58			-999	history of fever, chest pains, body pains	negative	-999	Ghanaian
186	KCCR/KSH-049	F	25			ASHANTI	cough	negative	-999	Ghanaian
187	KCCR/KSH-050	F	21			ASHANTI	cough, general weakness, shortness of breath	negative	-999	Ghanaian
188	KCCR/KSH-051	F	21			ASHANTI	history of fever, general weakness, cough, sore throat, shortness of breath, diarrhoea, nausea/vomiting, headache, chest pain, abdominal pain	negative	-999	Ghanaian
189	KCCR/KSH-052	M	52			ASHANTI	cough, sore throat, runny nose	negative	-999	Ghanaian
190	KCCR/KSH-053	M	40			ASHANTI	cough, sore throat, runny nose, headache	negative	-999	Ghanaian
191	KCCR/BOS-032	F	33			ASHANTI	Cough, Headache	negative	-999	Ghanaian
39654	KCCR/SGH-2272	F	29			ASHANTI	Asymptomatic	negative	-999	Ghanaian
193	KCCR/KSH-055	M	30			ASHANTI	history of fever, cough, sore throat, runny nose	negative	-999	Ghanaian
194	KCCR/KSH-056	F	56			ASHANTI	history of fever, cough, shortness of breath, irritability	negative	-999	Ghanaian
195	KCCR/AGO-026	-999	-999			ASHANTI	no symptoms	negative	-999	Ghanaian
196	KCCR/KSH-057	M	31			ASHANTI	history of fever, general weakness, shortness of breath, Headache,	negative	-999	Ghanaian
197	KCCR/KSH-058	M	36			ASHANTI	fever ,general weakness,cough,sorethroat,runny nose,shortness of breath,irritability,pulmonary tuberclosis	negative	-999	Ghanaian
198	KCCR/KSH-059	M	2			ASHANTI	Fever	negative	-999	Ghanaian
199	KCCR/KSH-060	M	30			ASHANTI	fever,general weakness,cough,shortness of breath,Diarrhoea	negative	-999	Ghanaian
200	KCCR/KNUSTH-023	M	29			ASHANTI	fever,general weakness,sore throat,headache	negative	-999	Ghanaian
201	KCCR/KATH-068	F	35			ASHANTI	runny nose,shortness of breath	negative	-999	Ghanaian
202	KCCR/KATH-069	F	50			ASHANTI	Sore throat,gingivitis	negative	-999	Ghanaian
203	KCCR/KSH-061	M	47			ASHANTI	cough ,headache	POSITIVE	-999	Ghanaian
204	KCCR/MHA-002	M	53			ASHANTI	fever,cough,soe throat,shortness of breath	negative	-999	Ghanaian
205	KCCR/TTH-004	M	26			NORTHERN	MANDATORY QUARANTINE AND TESTING	POSITIVE	-999
206	KCCR/TTH-005	F	30			NORTHERN	MANDATORY QUARANTINE AND TESTING	POSITIVE	-999
207	KCCR/TTH-006	F	-999			NORTHERN	MANDATORY QUARANTINE AND TESTING	POSITIVE	-999
208	KCCR/TTH-007	F	29			NORTHERN	MANDATORY QUARANTINE AND TESTING	POSITIVE	-999
209	KCCR/TTH-008	F	22			NORTHERN	MANDATORY QUARANTINE AND TESTING	POSITIVE	-999
210	KCCR/TTH-009	F	24			NORTHERN	MANDATORY QUARANTINE AND TESTING	POSITIVE	-999
211	KCCR/TTH-010	F	30			NORTHERN	MANDATORY QUARANTINE AND TESTING	POSITIVE	-999
212	KCCR/TTH-011	F	25			NORTHERN	MANDATORY QUARANTINE AND TESTING	POSITIVE	-999
213	KCCR/TTH-012	M	46			NORTHERN	MANDATORY QUARANTINE AND TESTING	negative	-999
214	KCCR/TTH-013	M	45			NORTHERN	MANDATORY QUARANTINE AND TESTING	POSITIVE	-999
215	KCCR/TTH-014	F	39			NORTHERN	MANDATORY QUARANTINE AND TESTING	POSITIVE	-999
216	KCCR/TTH-015	F	35			NORTHERN	cough ,shortness of breath,syncope,easy fatiqubility,dizziness	negative	-999	Ghanaian
217	KCCR/TTH-016	M	-999			NORTHERN	fever,general weakness,cough,sore throat,runny nose,shortness of breath,dyspnea	negative	-999	Ghanaian
218	KCCR/BR-003	M	26			BONO	fever,general weakness,cough,sore throat,shortness of breath,muscular pains	negative	-999	Ghanaian
219	KCCR/BR-004	F	23			BONO	fever,sore throat,shortness of breath,abdominal and chest pains	negative	-999	Ghanaian
221	KCCR/AGO-027	M	44			ASHANTI	No symptoms	negative	-999	Ghanaian
222	KCCR/AGO-028	M	31			ASHANTI	No symptoms	negative	-999	Ghanaian
223	KCCR/AGO-029	F	56			ASHANTI	No symptoms	negative	-999	Ghanaian
224	KCCR/AGO-030	F	23			ASHANTI	No symptoms	negative	-999	Ghanaian
225	KCCR/AGO-031	M	23	999	999	ASHANTI	headache	negative	999	Ghanaian
226	KCCR/AGO-032	F	38			ASHANTI	headache	negative	-999	Ghanaian
227	KCCR/AGO-033	M	27			ASHANTI	cough,runny nose	negative	-999	Ghanaian
228	KCCR/AGO-034	M	57			ASHANTI	No symptoms	negative	-999	Ghanaian
229	KCCR/AGO-035	M	32			ASHANTI	No symptoms	negative	-999	Ghanaian
230	KCCR/AGO-036	M	41			ASHANTI	No symptoms	negative	-999	Ghanaian
231	KCCR/AGO-037	F	-999			ASHANTI	No symptoms	negative	-999	Ghanaian
232	KCCR/AGO-038	M	50			ASHANTI	No symptoms	negative	-999	Ghanaian
233	KCCR/AGO-039	M	50			ASHANTI	No symptoms	POSITIVE	-999	Ghanaian
234	KCCR/AGO-040	F	49			ASHANTI	No symptoms	negative	-999	Ghanaian
235	KCCR/AGO-041	F	15			ASHANTI	No symptoms	negative	-999	Ghanaian
236	KCCR/AGO-042	F	28			ASHANTI	No symptoms	negative	-999	Ghanaian
237	KCCR/AGO-043	M	34			ASHANTI	No symptoms	negative	-999	Ghanaian
238	KCCR/AGO-044	F	36			ASHANTI	No symptoms	negative	-999	Ghanaian
239	KCCR/KATH-070	F	57			ASHANTI	fever,cough,shortness of breath	negative	-999	Ghanaian
240	KCCR/UPE-008	F	4			UPPER EAST	general weakness, cough, shortness of breath, nausea/vomiting, dyspnea/tachypnea, abnormal lung auscultation	negative	-999	Ghanaian
241	KCCR/UPE-009	M	38			UPPER EAST	no symptoms	negative	-999	Ghanaian
242	KCCR/UPE-010	F	30			UPPER EAST	history of fever, general weakness, cough, sore throat, shortness of breath, diarrhoea, headache	negative	-999	Ghanaian
243	KCCR/KSH-062	M	81			ASHANTI	history of fever, general weakness, cough, shortness of breath, headache	negative	-999	Ghanaian
244	KCCR/KATH-071	M	39			ASHANTI	history of fever, runny nose, headache	negative	-999	Ghanaian
245	KCCR/KATH-072	M	52			ASHANTI	runny nose, shortness of breath	negative	-999	Ghanaian
246	KCCR/KATH-073	F	55			ASHANTI	history of fever, general weakness	negative	-999	Ghanaian
247	KCCR/KATH-074	F	22			ASHANTI	history of fever, general weakness, sore throat, shortness of breath, headache	negative	-999	Ghanaian
248	KCCR/KNUSTH-024	M	34			ASHANTI	history of fever, cough, sore throat, shortness of breath	negative	-999	Ghanaian
249	KCCR/NER-002	M	33			NORTH EAST	y	negative	-999	Ghanaian
250	KCCR/NER-003	F	-999			NORTH EAST	history of fever, general weakness, sore throat, runny nose	negative	-999	Ghanaian
251	KCCR/NER-004	F	-999			NORTH EAST	history of fever, cough, sore throat, runny nose, diarrhoea, nausea/vomiting, abdominal pain	negative	-999	Ghanaian
252	KCCR/KATH-075	F	49			ASHANTI	sore throat, shortness of breath,irritability,coma,dyspnea	negative	-999	Ghanaian
253	KCCR/KSH-063	M	50			ASHANTI	history of fever, cough, shortness of breath	negative	-999	Ghanaian
254	KCCR/KSH-064	M	25			ASHANTI	history of fever, general weakness, runny nose,shortness of breath,nausea ,chest pains	negative	-999	Ghanaian
255	KCCR/KATH-076	F	53			ASHANTI	cough, shortness of breath,diarrhoea	negative	-999	Ghanaian
257	KCCR/KATH-077	M	45			ASHANTI	cough, shortness of breath, chest pain	negative	-999	Ghanaian
258	KCCR/WES-001	M	-999			WESTERN	history of fever, cough, muscular and joint pains	negative	-999
259	KCCR/WES-002	M	37			WESTERN	history of fever, dysuria and abdominal pain	negative	-999	Ghanaian
260	KCCR/WES-003	M	33			WESTERN	sneezing	negative	-999	Ghanaian
261	KCCR/BAB-003	F	21			WESTERN NORTH	history of fever/cough/runnynose,headache,chest pains	negative	-999	Ghanaian
262	KCCR/BAB-004	M	32			WESTERN NORTH	fever	negative	-999	Ghanaian
263	KCCR/BAB-005	M	24			WESTERN NORTH	History of fever	negative	-999	Ghanaian
264	KCCR/KSH-065	M	39			ASHANTI	history of fever ,cough	negative	-999	Ghanaian
265	KCCR/KSH-066	M	56			ASHANTI	history of fever ,general weakness,cough,shortness of breath,headache,abnormal lung auscultation	negative	-999	Ghanaian
266	KCCR/KATH-078	M	28			ASHANTI	Asymptomatic	negative	-999	Ghanaian
267	KCCR/KATH-079	M	27			ASHANTI	general weakness,cough	negative	-999	Ghanaian
268	KCCR/KATH-080	M	31			ASHANTI	cough,headache	negative	-999	Ghanaian
269	KCCR/KATH-081	M	27			ASHANTI	sore throat,runny nose,headache,abdominal pain	negative	-999	Ghanaian
270	KCCR/KATH-082	M	30			ASHANTI	Asymptomatic	negative	-999	Ghanaian
271	KCCR/KATH-083	M	27			ASHANTI	headache	negative	-999	Ghanaian
272	KCCR/KATH-084	M	29			ASHANTI	Asymptomatic	negative	-999	Ghanaian
273	KCCR/KATH-085	F	33			ASHANTI	Asymptomatic	negative	-999	Ghanaian
274	KCCR/KATH-086	M	19			ASHANTI	muscular pains	negative	-999	Ghanaian
275	KCCR/KATH-087	F	32			ASHANTI	history of fever,sorethroat,shortness of breath	negative	-999	Ghanaian
276	KCCR/KATH-088	M	29			ASHANTI	Asymptomatic	negative	-999	Ghanaian
277	KCCR/CEN-005	F	28			CENTRAL	history of fever ,general weakness,cough, sore throat, shortness of breath,headache,irritability ,joint pains	negative	-999	Ghanaian
278	KCCR/CEN-006	M	1			CENTRAL	history of fever ,general weakness,cough, runny nose,diarrhoea	negative	-999	Ghanaian
279	KCCR/AGO-045	M	48			ASHANTI	General weakness,cough,sore throat,shortness of breath,muscular and joint pains	negative	-999	Ghanaian
280	KCCR/AGO-046	M	42			ASHANTI	Asymptomatic	negative	-999	Ghanaian
281	KCCR/AGO-047	M	41			ASHANTI	Asymptomatic	negative	-999	Ghanaian
282	KCCR/AGO-048	M	34			ASHANTI	Asymptomatic	negative	-999	Ghanaian
283	KCCR/AGO-049	F	33			ASHANTI	Asymptomatic	negative	-999	Ghanaian
284	KCCR/AGO-050	M	57			ASHANTI	Asymptomatic	negative	-999	Ghanaian
285	KCCR/AGO-051	M	53			ASHANTI	Asymptomatic	negative	-999	Ghanaian
286	KCCR/AGO-052	M	32			ASHANTI	Asymptomatic	negative	-999	Ghanaian
287	KCCR/AGO-053	M	59			ASHANTI	Asymptomatic	negative	-999	Ghanaian
288	KCCR/AGO-054	M	55			ASHANTI	Asymptomatic	negative	-999	Ghanaian
289	KCCR/AGO-055	M	39			ASHANTI	Asymptomatic	negative	-999	Ghanaian
290	KCCR/AGO-056	M	35			ASHANTI	History of fever,general weakness,cough,sore throat,shortness of breath	negative	-999	Ghanaian
291	KCCR/AGO-057	F	32			ASHANTI	Cough,sore throat, runny nose	negative	-999	Ghanaian
292	KCCR/AGO-058	M	62			ASHANTI	Asymptomatic	negative	-999	Ghanaian
293	KCCR/AGO-059	M	62			ASHANTI	Asymptomatic	negative	-999	Ghanaian
294	KCCR/AGO-060	M	58			ASHANTI	Asymptomatic	negative	-999	Ghanaian
295	KCCR/AGO-061	M	57			ASHANTI	Sore throat	negative	-999	Ghanaian
296	KCCR/AGO-062	M	54			ASHANTI	Asymptomatic	negative	-999	Ghanaian
297	KCCR/KATH-090	M	-999			ASHANTI	history of fever	negative	-999	Ghanaian
298	KCCR/KATH-091	F	35			ASHANTI	Runny nose	negative	-999	Ghanaian
299	KCCR/KATH-092	M	62			ASHANTI	History of fever,cough,shortness of breath	negative	-999	Ghanaian
300	KCCR/KATH-093	M	38			ASHANTI	General weakness,cough,runny nose,nausea,headache	negative	-999	Ghanaian
301	KCCR/KATH-094	M	43			ASHANTI	History of fever,cough,coma,mild right pneumothorax	negative	-999	Ghanaian
302	KCCR/KATH-095	M	55			ASHANTI	cough,sore thoat,runny nose,conjunctival injection	negative	-999	Ghanaian
303	KCCR/KATH-096	F	52			ASHANTI	History of fever ,cough,runny nose,shortness of breath	negative	-999	Ghanaian
304	KCCR/KATH-097	M	36			ASHANTI	cough	negative	-999	Ghanaian
305	KCCR/WNR-001	M	65			WESTERN NORTH	History of fever,cough,headache	negative	-999	Ghanaian
306	KCCR/TTH-017	M	42			NORTHERN	Asymptomatic	negative	-999	Ghanaian
307	KCCR/TTH-018	-999	-999			NORTHERN	Asymptomatic	negative	-999	Ghanaian
308	KCCR/TTH-019	-999	-999			NORTHERN	Asymptomatic	negative	-999	Ghanaian
309	KCCR/TTH-020	M	37			NORTHERN	Asymptomatic	negative	-999	Ghanaian
310	KCCR/TTH-021	-999	-999			NORTHERN	Asymptomatic	negative	-999	Ghanaian
311	KCCR/TTH-022	-999	-999			NORTHERN	Asymptomatic	negative	-999	Ghanaian
312	KCCR/TTH-023	-999	-999			NORTHERN	Asymptomatic	negative	-999	Ghanaian
313	KCCR/TTH-024	M	40			NORTHERN	Asymptomatic	negative	-999	Ghanaian
314	KCCR/TTH-025	M	38			NORTHERN	Asymptomatic	negative	-999	Ghanaian
315	KCCR/TTH-026	M	26			NORTHERN	Runny nose	negative	-999	Ghanaian
316	KCCR/TTH-027	F	29			NORTHERN	Asymptomatic	negative	-999	Ghanaian
317	KCCR/TTH-028	M	29			NORTHERN	Asymptomatic	negative	-999	Ghanaian
318	KCCR/TTH-029	F	29			NORTHERN	Asymptomatic	negative	-999	Ghanaian
319	KCCR/TTH-030	M	27			NORTHERN	Asymptomatic	negative	-999	Ghanaian
320	KCCR/TTH-031	M	27			NORTHERN	Asymptomatic	negative	-999	Ghanaian
321	KCCR/TTH-032	M	29			NORTHERN	Asymptomatic	negative	-999	Ghanaian
322	KCCR/TTH-033	F	22			NORTHERN	Asymptomatic	negative	-999	Ghanaian
323	KCCR/TTH-034	M	31			NORTHERN	Asymptomatic	negative	-999	Ghanaian
324	KCCR/TTH-035	M	28			NORTHERN	Asymptomatic	negative	-999	Ghanaian
325	KCCR/TTH-036	F	-999			NORTHERN	Asymptomatic	negative	-999	Ghanaian
326	KCCR/TTH-037	F	45			NORTHERN	Asymptomatic	negative	-999	Ghanaian
327	KCCR/TTH-038	F	27			NORTHERN	Asymptomatic	negative	-999	Ghanaian
328	KCCR/TTH-039	F	36			NORTHERN	Asymptomatic	negative	-999	Ghanaian
329	KCCR/TTH-040	M	26			NORTHERN	Asymptomatic	negative	-999	Ghanaian
330	KCCR/TTH-041	M	35			NORTHERN	Asymptomatic	negative	-999	Ghanaian
331	KCCR/TTH-042	F	36			NORTHERN	Asymptomatic	negative	-999	Ghanaian
332	KCCR/TTH-043	F	33			NORTHERN	Asymptomatic	negative	-999	Ghanaian
333	KCCR/TTH-044	F	34			NORTHERN	Asymptomatic	negative	-999	Ghanaian
334	KCCR/TTH-045	M	34			NORTHERN	Asymptomatic	negative	-999	Ghanaian
335	KCCR/TTH-046	M	30			NORTHERN	Asymptomatic	negative	-999	Ghanaian
336	KCCR/TTH-047	M	28			NORTHERN	Asymptomatic	negative	-999	Ghanaian
337	KCCR/TTH-048	F	31			NORTHERN	Asymptomatic	negative	-999	Ghanaian
338	KCCR/TTH-049	M	32			NORTHERN	Asymptomatic	negative	-999	Ghanaian
339	KCCR/TTH-050	F	27			NORTHERN	General weakness,sorethroat,runny nose,Headache,tireness,muscular and chest pains	negative	-999	Ghanaian
340	KCCR/TTH-051	M	37			NORTHERN	cough,sore throat,shortness of breath,muscular pains	negative	-999	Ghanaian
341	KCCR/TTH-052	F	36			NORTHERN	Asymptomatic	negative	-999	Ghanaian
342	KCCR/TTH-053	M	34			NORTHERN	Asymptomatic	negative	-999	Ghanaian
343	KCCR/TTH-054	F	95			NORTHERN	Asymptomatic	negative	-999	Ghanaian
344	KCCR/TTH-055	F	32			NORTHERN	Asymptomatic	negative	-999	Ghanaian
345	KCCR/TTH-056	M	41			NORTHERN	Asymptomatic	negative	-999	Ghanaian
346	KCCR/TTH-057	M	35			NORTHERN	Asymptomatic	negative	-999	Ghanaian
347	KCCR/TTH-058	M	22			NORTHERN	General weakness, Sore throat	negative	-999	Ghanaian
348	KCCR/SR-002	M	4			SAVANNAH	History of fever/chills, cough, sore throat, nausea/vomiting	negative	-999	Ghanaian
349	KCCR/SR-003	F	18			SAVANNAH	Cough	negative	-999	Foreigner
350	KCCR/KNUSTH-026	M	33			ASHANTI	History of fever/chills, cough,shortness of breath	negative	-999	Ghanaian
59802	KCCR/SGH-2986	M	25			ASHANTI	Asymptomatic	negative	-999	Ghanaian
59801	KCCR/SGH-2985	M	22			ASHANTI	Headache	POSITIVE	-999	Ghanaian
353	KCCR/MDH-001	M	57			ASHANTI	Cough, Shortness of breath	negative	-999	Ghanaian
354	KCCR/MDH-002	M	42			ASHANTI	Asymptomatic	negative	-999	Ghanaian
355	KCCR/AHF-002	M	35			AHAFO	History of fever/chills, cough, diarrhoea, nausea/vomiting/ abdominal pains, semiconsciousness and dysponoea	negative	-999	Ghanaian
356	KCCR/AHF-003	M	38			AHAFO	History of fever/chills, general weakness, cough, sore throat, nausea/vomiting, irritability/confusion	negative	-999	Ghanaian
357	KCCR/BR-006	F	16			BONO	History of fever/chills, cough, headache, irritability/confusion, chest pains, sneezing	negative	-999	Foreigner
358	KCCR/BR-007	F	28			BONO	General weakness, runny nose, sneezing	negative	-999	Ghanaian
359	KCCR/BR-008	M	19			BONO	History of fever/chills, General weakness, cough, headache, muscular and joint pain	negative	-999	Foreigner
360	KCCR/BR-009	M	21			BONO	History of fever/chills, General weakness, sore throat, shortness of breath, headache	negative	-999	Ghanaian
361	KCCR/KSH-070	M	84			ASHANTI	Cough, Runny nose, headache	negative	-999	Ghanaian
362	KCCR/KATH-098	M	28			ASHANTI	History of fever/chills, shortness of breath	negative	-999	Ghanaian
363	KCCR/BAB-006	M	27			WESTERN NORTH	general weakness, cough, sore throat, runny nose, headache, muscular, chest, abdominal and joint pains	negative	-999	Ghanaian
364	KCCR/KSH-071	F	30			ASHANTI	General weakness	negative	-999	Ghanaian
365	KCCR/KSH-072	F	27			ASHANTI	General weakness	negative	-999	Foreigner
366	KCCR/KSH-073	F	35			ASHANTI	Asymptomatic	negative	-999	Ghanaian
367	KCCR/KSH-074	F	35			ASHANTI	Asymptomatic	negative	-999	Ghanaian
368	KCCR/KSH-075	F	41			ASHANTI	History of fever/chills, cough, headache, nausea/vomiting, shortness of breath	negative	-999	Ghanaian
369	KCCR/KSH-076	F	29			ASHANTI	History of fever/chills, cough, sore throat, nausea/vomiting, headache, abdominal pain	negative	-999	Ghanaian
67430	KCCR/SGH-3604	M	30			ASHANTI	Asymptomatic	negative	-999	Ghanaian
67428	KCCR/SGH-3602	M	32			ASHANTI	Asymptomatic	negative	-999	Ghanaian
67429	KCCR/SGH-3603	M	32			ASHANTI	Asymptomatic	negative	-999	Ghanaian
67432	KCCR/SGH-3606	M	35			ASHANTI	Asymptomatic	negative	-999	Ghanaian
5788	KCCR/SGH-544	F	20			ASHANTI	Asymptomatic	negative	-999	Ghanaian
39655	KCCR/SGH-2273	F	32			ASHANTI	Asymptomatic	negative	-999	Ghanaian
26894	KCCR/SGH-1900	F	22			ASHANTI	Asymptomatic	negative	-999	Ghanaian
17139	KCCR/SGH-1336	F	41			ASHANTI	Asymptomatic	negative	-999	Ghanaian
15704	KCCR/SGH-1149	M	19			ASHANTI	Asymptomatic	negative	-999	Ghanaian
23875	KCCR/SGH-1675	M	24			ASHANTI	Asymptomatic	negative	-999	Ghanaian
26861	KCCR/SGH-1867	M	47			ASHANTI	Asymptomatic	negative	-999	Ghanaian
382	KCCR/KATH-099	M	38			ASHANTI	history of fever, sore throat, shortness of breath	negative	-999	Ghanaian
383	KCCR/TTH-059	M	-999			NORTHERN	Asymptomatic	negative	-999	Foreigner
384	KCCR/TTH-060	M	-999			NORTHERN	Headache	negative	-999	Foreigner
385	KCCR/TTH-061	M	-999			NORTHERN	Asymptomatic	negative	-999	Foreigner
386	KCCR/TTH-062	M	-999			NORTHERN	Asymptomatic	negative	-999	Foreigner
387	KCCR/TTH-063	M	-999			NORTHERN	Asymptomatic	negative	-999	Foreigner
388	KCCR/TTH-064	F	21			NORTHERN	History of fever/chills, sore throat, runny nose, headache, sneezing	negative	-999	Ghanaian
389	KCCR/TTH-065	M	35			NORTHERN	Irritability/confusion	negative	-999	Ghanaian
390	KCCR/TTH-066	M	-999			NORTHERN	Cough, runny nose, symptoms resolving after starting medication	negative	-999	Ghanaian
391	KCCR/KNUSTH-027	M	43			ASHANTI	Cough, runny nose	negative	-999	Ghanaian
392	KCCR/UPW-004	M	33			UPPER WEST	history of fever, cough, sore throat, runny nose	negative	-999	Ghanaian
393	KCCR/UPW-005	M	36			UPPER WEST	history of fever, cough, sore throat	negative	-999	Ghanaian
394	KCCR/UPW-006	M	49			UPPER WEST	Asymptomatic	negative	-999	Ghanaian
395	KCCR/UPW-007	M	32			UPPER WEST	Asymptomatic	negative	-999	Ghanaian
396	KCCR/UPW-008	M	25			UPPER WEST	Asymptomatic	negative	-999	Ghanaian
397	KCCR/UPW-009	F	56			UPPER WEST	general weakness, cough, headache	negative	-999	Ghanaian
398	KCCR/UPW-010	F	58			UPPER WEST	general weakness, cough, headache	negative	-999	Ghanaian
399	KCCR/UPW-011	F	36			UPPER WEST	history of fever, general weakness, runny nose	negative	-999	Foreigner
400	KCCR/UPW-012	M	19			UPPER WEST	cough, shortness of breath, pain	negative	-999	Ghanaian
401	KCCR/KATH-100	M	32			ASHANTI	history of fever, general weakness, shortness of breath, nausea/vomiting, headache, muscular pain, intermittent sneezing	negative	-999	Ghanaian
402	KCCR/KNUSTH-028	M	40			ASHANTI	cough	negative	-999	Ghanaian
403	KCCR/KSH-077	M	51			ASHANTI	general weakness, cough, sore throat, headache	negative	-999	Ghanaian
404	KCCR/KSH-078	F	29			ASHANTI	cough, sore throat, headache, chest pain	negative	-999	Ghanaian
405	KCCR/KSH-079	F	45			ASHANTI	Asymptomatic	negative	-999	Ghanaian
406	KCCR/KSH-080	M	57			ASHANTI	Asymptomatic	negative	-999	Ghanaian
407	KCCR/AGO-063	M	-999			ASHANTI	Asymptomatic	negative	-999	Ghanaian
408	KCCR/AGO-064	F	-999			ASHANTI	Asymptomatic	negative	-999	Ghanaian
409	KCCR/AGO-065	F	17			ASHANTI	Asymptomatic	negative	-999	Ghanaian
410	KCCR/AGO-066	M	21			ASHANTI	cough, sore throat, headache	negative	-999	Ghanaian
411	KCCR/AGO-067	M	28			ASHANTI	Asymptomatic	negative	-999	Ghanaian
412	KCCR/AGO-068	M	27			ASHANTI	Asymptomatic	negative	-999	Ghanaian
413	KCCR/AGO-069	M	65			ASHANTI	History of fever/chills, cough, shortness of breath, muscular pain	negative	-999	Ghanaian
414	KCCR/AGO-070	M	36			ASHANTI	Asymptomatic	negative	-999	Ghanaian
415	KCCR/AGO-071	F	27			ASHANTI	History of fever/chills, cough, headache	negative	-999	Ghanaian
416	KCCR/AGO-072	F	-999			ASHANTI	Asymptomatic	negative	-999	Ghanaian
417	KCCR/OFM-001	M	32			ASHANTI	Asymptomatic	negative	-999	Ghanaian
418	KCCR/OFM-002	F	26			ASHANTI	Asymptomatic	negative	-999	Ghanaian
419	KCCR/OFM-003	F	35			ASHANTI	Asymptomatic	negative	-999	Ghanaian
420	KCCR/OFM-004	M	-999			ASHANTI	Asymptomatic	negative	-999	Ghanaian
421	KCCR/OFM-005	F	76			ASHANTI	Asymptomatic	negative	-999	Ghanaian
422	KCCR/KSH-081	M	29			ASHANTI	cough	negative	-999	Foreigner
423	KCCR/KSH-082	M	-999			ASHANTI	Asymptomatic	negative	-999	Ghanaian
424	KCCR/KSH-083	F	31			ASHANTI	history of fever, general weakness, cough, sore throat, shortness of breath, headache, irritability	negative	-999	Ghanaian
425	KCCR/KSH-084	M	32			ASHANTI	Asymptomatic	negative	-999	Ghanaian
426	KCCR/KSH-085	M	60			ASHANTI	Asymptomatic	negative	-999	Ghanaian
427	KCCR/KSH-086	M	22			ASHANTI	Asymptomatic	negative	-999	Ghanaian
428	KCCR/KSH-087	M	36			ASHANTI	Asymptomatic	negative	-999	Ghanaian
429	KCCR/KSH-088	M	24			ASHANTI	Asymptomatic	negative	-999	Ghanaian
430	KCCR/KSH-089	M	43			ASHANTI	Asymptomatic	negative	-999	Ghanaian
431	KCCR/KSH-090	M	33			ASHANTI	history of fever, cough, sore throat, shortness of breath, headache	negative	-999	Ghanaian
432	KCCR/KSH-091	M	65			ASHANTI	Asymptomatic	negative	-999	Ghanaian
433	KCCR/KSH-092	M	35			ASHANTI	Asymptomatic	negative	-999	Ghanaian
434	KCCR/KSH-093	M	35			ASHANTI	Asymptomatic	negative	-999	Ghanaian
435	KCCR/KSH-094	M	26			ASHANTI	Cough, runny nose	negative	-999	Ghanaian
436	KCCR/KSH-095	M	50			ASHANTI	Asymptomatic	negative	-999	Ghanaian
437	KCCR/KSH-096	M	41			ASHANTI	Asymptomatic	negative	-999	Ghanaian
438	KCCR/KSH-097	F	31			ASHANTI	Asymptomatic	negative	-999	Ghanaian
3298	KCCR/SGH-267	F	30			ASHANTI	Cough, runny nose, headache	negative	-999	Ghanaian
440	KCCR/KSH-098	M	24			ASHANTI	no symptoms	negative	-999
441	KCCR/KSH-099	M	52			ASHANTI	Cough, runny nose, shortness of breath	negative	-999	Foreigner
442	KCCR/KSH-100	M	71			ASHANTI	History of fever, general weakness, cough, sore throat, chest pain	negative	-999	Ghanaian
443	KCCR/KSH-101	M	68			ASHANTI	General weakness, cough, shortness of breath, weight loss	negative	-999	Ghanaian
444	KCCR/KSH-102	M	36			ASHANTI	Asymptomatic	negative	-999	Foreigner
445	KCCR/KSH-103	F	33			ASHANTI	Asymptomatic	negative	-999	Foreigner
446	KCCR/KSH-104	F	40			ASHANTI	Asymptomatic	negative	-999	Foreigner
447	KCCR/KSH-105	F	38			ASHANTI	Asymptomatic	negative	-999	Foreigner
448	KCCR/KSH-106	M	41			ASHANTI	Asymptomatic	negative	-999	Foreigner
449	KCCR/KSH-107	M	26			ASHANTI	Asymptomatic	negative	-999	Foreigner
450	KCCR/KSH-108	F	26			ASHANTI	Asymptomatic	negative	-999	Foreigner
451	KCCR/KSH-109	F	24			ASHANTI	Asymptomatic	negative	-999	Foreigner
452	KCCR/KSH-110	F	24			ASHANTI	Asymptomatic	negative	-999	Foreigner
453	KCCR/KSH-111	F	34			ASHANTI	Asymptomatic	negative	-999	Foreigner
454	KCCR/KSH-112	F	35			ASHANTI	Asymptomatic	negative	-999	Foreigner
5785	KCCR/SGH-541	F	31			ASHANTI	Asymptomatic	negative	-999	Ghanaian
32386	KCCR/SGH-2195	F	22			ASHANTI	Headache	negative	-999	Ghanaian
59670	KCCR/SGH-2944	F	47			ASHANTI	General weakness,cough,sore throat,loss of sense of smell	POSITIVE	28.78	Ghanaian
39660	KCCR/SGH-2278	M	28			ASHANTI	Asymptomatic	negative	-999	Ghanaian
460	KCCR/TTH-067	M	27			NORTHERN	Asymptomatic	negative	999	Ghanaian
461	KCCR/TTH-068	M	28			NORTHERN	Asymptomatic	negative	999	Ghanaian
462	KCCR/TTH-069	F	35			NORTHERN	cough	negative	999	Ghanaian
463	KCCR/TTH-070	M	33			NORTHERN	Asymptomatic	negative	999	Ghanaian
464	KCCR/TTH-071	M	45			NORTHERN	Asymptomatic	negative	999	Ghanaian
465	KCCR/TTH-072	M	34			NORTHERN	Asymptomatic	negative	999	Ghanaian
466	KCCR/TTH-073	F	-999			NORTHERN	Asymptomatic	negative	999	Ghanaian
467	KCCR/TTH-074	F	24			NORTHERN	cough,runny nose	negative	999	Ghanaian
468	KCCR/TTH-075	M	23			NORTHERN	history of fever,cough,sore throat, chest pains	negative	999	Ghanaian
469	KCCR/TTH-076	M	22			NORTHERN	Asymptomatic	negative	999	Ghanaian
470	KCCR/TTH-077	M	19			NORTHERN	history of fever,general weakness,cough,headache	negative	999	Ghanaian
471	KCCR/TTH-078	M	28			NORTHERN	Asymptomatic	negative	999	Ghanaian
472	KCCR/TTH-079	M	34			NORTHERN	Asymptomatic	negative	999	Ghanaian
473	KCCR/BAB-007	M	35			WESTERN NORTH	diarrhoea	negative	999	Ghanaian
474	KCCR/BAB-008	M	53			WESTERN NORTH	cough	negative	999	Ghanaian
475	KCCR/KSH-118	M	49			ASHANTI	Asymptomatic	negative	999	Foreigner
476	KCCR/KSH-119	F	43			ASHANTI	Asymptomatic	negative	999	Foreigner
477	KCCR/KSH-120	F	46			ASHANTI	Asymptomatic	negative	999	Foreigner
478	KCCR/KSH-121	F	30			ASHANTI	Asymptomatic	negative	999	Ghanaian
479	KCCR/KSH-122	M	22			ASHANTI	Asymptomatic	negative	999	Ghanaian
480	KCCR/KSH-123	M	27			ASHANTI	Asymptomatic	negative	999	Foreigner
481	KCCR/KSH-124	M	40			ASHANTI	Asymptomatic	negative	999	Foreigner
482	KCCR/KSH-125	M	40			ASHANTI	Asymptomatic	negative	999	Foreigner
483	KCCR/KSH-126	F	38			ASHANTI	Asymptomatic	negative	999	Foreigner
484	KCCR/KSH-127	M	24			ASHANTI	Asymptomatic	negative	999	Ghanaian
485	KCCR/KSH-128	M	18			ASHANTI	Asymptomatic	negative	999	Ghanaian
486	KCCR/KNUSTH-029	M	35			ASHANTI	History of fever, general weakness, cough, sore throat, runny nose, shortness, diarrhoea, nausea, headache, irritability, body pains	negative	999	Ghanaian
487	KCCR/BE-004	F	31			BONO EAST	History of fever,general weakness, nausea,headache	negative	999	Ghanaian
488	KCCR/KATH-101	F	-999			ASHANTI	Asymptomatic	negative	999	Ghanaian
489	KCCR/KATH-102	F	34			ASHANTI	Asymptomatic	negative	999	Ghanaian
490	KCCR/KATH-103	M	30			ASHANTI	Asymptomatic	negative	999	Ghanaian
491	KCCR/KATH-104	M	59			ASHANTI	Asymptomatic	negative	999	Ghanaian
492	KCCR/KSH-129	F	23			ASHANTI	history of fever,cough,sore throat	negative	999	Ghanaian
493	KCCR/OFM-006	F	23			ASHANTI	Asymptomatic	negative	999	Ghanaian
494	KCCR/OFM-007	F	28			ASHANTI	Asymptomatic	negative	999	Ghanaian
495	KCCR/OFM-008	F	30			ASHANTI	Asymptomatic	negative	999	Ghanaian
496	KCCR/OFM-009	F	25			ASHANTI	Asymptomatic	negative	999	Ghanaian
497	KCCR/OFM-010	F	32			ASHANTI	Asymptomatic	negative	999	Ghanaian
498	KCCR/OFM-011	F	25			ASHANTI	Asymptomatic	negative	999	Ghanaian
499	KCCR/OFM-012	M	23			ASHANTI	Asymptomatic	negative	999	Ghanaian
500	KCCR/OFM-013	F	26			ASHANTI	Asymptomatic	negative	999	Ghanaian
501	KCCR/OFM-014	F	31			ASHANTI	Asymptomatic	negative	999	Ghanaian
502	KCCR/OFM-015	M	29			ASHANTI	Asymptomatic	negative	999	Ghanaian
503	KCCR/OFM-016	F	37			ASHANTI	Asymptomatic	negative	999	Ghanaian
504	KCCR/OFM-017	F	24			ASHANTI	Asymptomatic	negative	999	Ghanaian
505	KCCR/OFM-018	F	34			ASHANTI	Asymptomatic	negative	999	Ghanaian
506	KCCR/OFM-019	M	33			ASHANTI	Asymptomatic	negative	999	Ghanaian
507	KCCR/OFM-020	M	28			ASHANTI	Asymptomatic	negative	999	Ghanaian
508	KCCR/OFM-021	M	49			ASHANTI	Asymptomatic	negative	999	Ghanaian
509	KCCR/OFM-022	M	51			ASHANTI	Asymptomatic	negative	999	Ghanaian
510	KCCR/KSH-130	F	60			ASHANTI	History of fever,general weakness,cough,runny nose	negative	999	Ghanaian
511	KCCR/ASS-001	M	63			ASHANTI	Asymptomatic	negative	999	Ghanaian
512	KCCR/ASS-002	M	56			ASHANTI	Asymptomatic	negative	999	Ghanaian
513	KCCR/ASS-003	F	33			ASHANTI	Asymptomatic	negative	999	Ghanaian
514	KCCR/ASS-004	F	40			ASHANTI	Asymptomatic	negative	999	Ghanaian
515	KCCR/ASS-005	M	35			ASHANTI	Asymptomatic	negative	999	Ghanaian
516	KCCR/ASS-006	M	54			ASHANTI	Asymptomatic	negative	999	Ghanaian
517	KCCR/ASS-007	F	35			ASHANTI	Asymptomatic	negative	999	Ghanaian
518	KCCR/ASS-008	M	4			ASHANTI	Asymptomatic	negative	999	Ghanaian
519	KCCR/ASS-009	M	44			ASHANTI	Asymptomatic	negative	999	Ghanaian
520	KCCR/ASS-010	F	46			ASHANTI	Asymptomatic	negative	999	Ghanaian
521	KCCR/ASS-011	F	57			ASHANTI	Asymptomatic	negative	999	Ghanaian
522	KCCR/ASS-012	M	45			ASHANTI	Asymptomatic	negative	999	Ghanaian
523	KCCR/ASS-013	M	33			ASHANTI	Asymptomatic	negative	999	Ghanaian
524	KCCR/ASS-014	F	60			ASHANTI	Asymptomatic	negative	999	Ghanaian
525	KCCR/ASS-015	F	47			ASHANTI	Asymptomatic	negative	999	Ghanaian
526	KCCR/ASS-016	F	27			ASHANTI	Asymptomatic	negative	999	Ghanaian
527	KCCR/ASS-017	F	33			ASHANTI	Asymptomatic	negative	999	Ghanaian
528	KCCR/ASS-018	F	15			ASHANTI	Asymptomatic	negative	999	Ghanaian
529	KCCR/ASS-019	F	14			ASHANTI	Asymptomatic	negative	999	Ghanaian
530	KCCR/ASS-020	M	4			ASHANTI	Asymptomatic	negative	999	Ghanaian
531	KCCR/ASS-021	M	5			ASHANTI	Asymptomatic	negative	999	Ghanaian
532	KCCR/ASS-022	M	55			ASHANTI	Asymptomatic	negative	999	Ghanaian
533	KCCR/ASS-023	M	47			ASHANTI	Asymptomatic	negative	999	Ghanaian
534	KCCR/ASS-024	M	33			ASHANTI	Asymptomatic	negative	999	Ghanaian
535	KCCR/ASS-025	F	63			ASHANTI	Asymptomatic	negative	999	Ghanaian
536	KCCR/ASS-026	M	37			ASHANTI	Asymptomatic	negative	999	Ghanaian
537	KCCR/ASS-027	M	44			ASHANTI	Asymptomatic	negative	999	Ghanaian
538	KCCR/ASS-028	M	50			ASHANTI	Asymptomatic	negative	999	Ghanaian
539	KCCR/ASS-029	M	55			ASHANTI	Asymptomatic	negative	999	Ghanaian
540	KCCR/ASS-030	M	11			ASHANTI	Asymptomatic	negative	999	Ghanaian
541	KCCR/ASS-031	M	40			ASHANTI	Asymptomatic	negative	999	Ghanaian
542	KCCR/ASS-032	M	36			ASHANTI	Asymptomatic	negative	999	Ghanaian
543	KCCR/ASS-033	F	52			ASHANTI	Asymptomatic	negative	999	Ghanaian
544	KCCR/KATH-105	M	52			ASHANTI	Asymptomatic	negative	999	Ghanaian
545	KCCR/UPW-013	M	30			UPPER WEST	sore throat,headache,chest pain	negative	999	Ghanaian
546	KCCR/UPE-011	F	33			UPPER EAST	general weakness,sore throat,shortness of breath	POSITIVE	999	Ghanaian
547	KCCR/UPE-012	F	36			UPPER EAST	history of fever,general weakness,cough,shortness of breath,headache,chest pains	negative	999	Ghanaian
548	KCCR/UPE-013	M	36			UPPER EAST	Asymptomatic	negative	999	Ghanaian
549	KCCR/UPE-014	M	21			UPPER EAST	Asymptomatic	negative	999	Ghanaian
550	KCCR/UPE-015	M	23			UPPER EAST	history of fever,general weakness,cough,headache	negative	999	Ghanaian
551	KCCR/UPE-016	M	69			UPPER EAST	Asymptomatic	negative	999	Ghanaian
552	KCCR/UPE-017	F	50			UPPER EAST	Asymptomatic	negative	999	Ghanaian
553	KCCR/UPE-018	M	20			UPPER EAST	Asymptomatic	negative	999	Ghanaian
554	KCCR/UPE-019	F	23			UPPER EAST	history of fever,general weakness,cough,shortness of breath,headache,chest pains	negative	999	Ghanaian
555	KCCR/UPE-020	F	30			UPPER EAST	history of fever,general weakness,headache,chest pain	negative	999	Ghanaian
12045	KCCR/SGH-1049	M	22			ASHANTI	Asymptomatic	negative	999	Ghanaian
64556	KCCR/SGH-3438	M	8			ASHANTI	Asymptomatic	negative	999	Ghanaian
15692	KCCR/SGH-1137	M	25			ASHANTI	Asymptomatic	negative	999	Ghanaian
56353	KCCR/SGH-2822	F	20			ASHANTI	Asymptomatic	negative	999	Ghanaian
15720	KCCR/SGH-1165	M	30			ASHANTI	Asymptomatic	negative	999	Ghanaian
8245	KCCR/SGH-686	M	37			ASHANTI	Asymptomatic	negative	999	Ghanaian
42074	KCCR/SGH-2522	M	24			ASHANTI	Asymptomatic	negative	999	Ghanaian
59806	KCCR/SGH-2990	F	54			ASHANTI	Asymptomatic	negative	999	Ghanaian
67196	KCCR/SGH-3577	M	36			ASHANTI	Asymptomatic	negative	999	Ghanaian
26848	KCCR/SGH-1854	F	36			ASHANTI	Asymptomatic	negative	999	Ghanaian
17169	KCCR/SGH-1366	M	47			ASHANTI	Cough	negative	999	Ghanaian
23837	KCCR/SGH-1637	M	55			ASHANTI	Asymptomatic	negative	999	Ghanaian
65096	KCCR/SGH-3449	M	41			ASHANTI	History of fever,general weakness,cough,headache	POSITIVE	19.37	Ghanaian
39765	KCCR/SGH-2383	M	29			ASHANTI	Asymptomatic	negative	999	Ghanaian
1424	KCCR/KSI-126	M	26			ASHANTI	Asymptomatic	negative	999	Ghanaian
10875	KCCR/SGH-822	M	52			ASHANTI	Asymptomatic	negative	999	Ghanaian
39711	KCCR/SGH-2329	M	59			ASHANTI	Asymptomatic	negative	999	Ghanaian
575	KCCR/KATH-106	M	-999			ASHANTI	vomiting blood	negative	999	Ghanaian
576	KCCR/KATH-107	M	44			ASHANTI	history of fever,cough	negative	999	Ghanaian
577	KCCR/OFM-023	F	72			ASHANTI	Asymptomatic	negative	999	Ghanaian
578	KCCR/OFM-024	F	52			ASHANTI	General weakness, cough, shortness of breath	negative	999	Ghanaian
579	KCCR/OFM-025	M	30			ASHANTI	History of fever, general weakness, cough, headache	negative	999	Ghanaian
580	KCCR/OFM-026	M	53			ASHANTI	Asymptomatic	negative	999	Ghanaian
581	KCCR/AMP-001	M	14			ASHANTI	History of fever, sore throat	negative	999	Ghanaian
582	KCCR/AMP-002	M	42			ASHANTI	History of fever, cough	negative	999	Ghanaian
583	KCCR/AMP-003	M	23			ASHANTI	Asymptomatic	negative	999	Ghanaian
584	KCCR/BE-005	M	55			BONO EAST	History of fever, general weakness, cough, sore throat	negative	999	Ghanaian
585	KCCR/BE-006	M	26			BONO EAST	History of fever, cough, sore throat, runny nose, shortness of breath, diarrhoea, headache, muscular pain	negative	999	Ghanaian
586	KCCR/KSH-132	M	26			ASHANTI	General weakness, cough, headache, muscular, chest and joint pains	negative	999	Ghanaian
587	KCCR/KSH-133	F	54			ASHANTI	History of fever, general weakness, cough, sore throat, shortness of breath, headache, chest pains	negative	999	Ghanaian
588	KCCR/BR-010	M	49			BONO	history of fever, general weakness, sore throat, shortness of breath, headache	negative	999	Ghanaian
589	KCCR/BR-011	F	34			BONO	Asymptomatic	negative	999	Ghanaian
590	KCCR/KSH-134	M	44			ASHANTI	runny nose	negative	999	Foreigner
591	KCCR/KSH-135	F	28			ASHANTI	history of fever, cough, runny nose, headache	negative	999	Ghanaian
592	KCCR/CEN-007	M	40			CENTRAL	history of fever, cough, sore throat, runny nose	negative	999	Ghanaian
593	KCCR/KSH-136	M	40			ASHANTI	Asymptomatic	negative	999	Ghanaian
594	KCCR/KSH-137	M	22			ASHANTI	Asymptomatic	negative	999	Ghanaian
595	KCCR/KSH-138	M	38			ASHANTI	Asymptomatic	negative	999	Ghanaian
596	KCCR/KSH-139	M	40			ASHANTI	Asymptomatic	negative	999	Ghanaian
597	KCCR/KSH-140	M	23			ASHANTI	Asymptomatic	negative	999	Ghanaian
598	KCCR/KSH-141	F	30			ASHANTI	Asymptomatic	negative	999	Ghanaian
599	KCCR/KSH-142	M	36			ASHANTI	Asymptomatic	negative	999	Ghanaian
600	KCCR/KSH-143	F	24			ASHANTI	Asymptomatic	negative	999	Ghanaian
601	KCCR/KSH-144	F	25			ASHANTI	cough, headache	negative	999	Ghanaian
602	KCCR/KSH-145	F	29			ASHANTI	History of fever, cough	negative	999	Ghanaian
603	KCCR/KSH-146	F	24			ASHANTI	cough, headache	negative	999	Foreigner
604	KCCR/KSH-147	F	25			ASHANTI	runny nose, headache, diarrhoea	negative	999	Foreigner
605	KCCR/KSH-148	F	36			ASHANTI	Asymptomatic	negative	999	Ghanaian
606	KCCR/KSH-149	F	36			ASHANTI	Asymptomatic	negative	999	Ghanaian
607	KCCR/KSH-150	F	24			ASHANTI	Headache	negative	999	Ghanaian
608	KCCR/KSH-151	M	19			ASHANTI	Headache, stomach ache	negative	999	Foreigner
609	KCCR/KSH-152	F	39			ASHANTI	Runny nose	negative	999	Foreigner
610	KCCR/KSH-153	F	30			ASHANTI	Runny nose	negative	999	Foreigner
611	KCCR/KSH-154	F	27			ASHANTI	Asymptomatic	negative	999	Foreigner
612	KCCR/KSH-155	F	34			ASHANTI	Asymptomatic	negative	999	Foreigner
613	KCCR/KSH-156	F	37			ASHANTI	Asymptomatic	negative	999	Foreigner
614	KCCR/KSH-157	F	24			ASHANTI	Asymptomatic	negative	999	Foreigner
615	KCCR/KSH-158	F	27			ASHANTI	Asymptomatic	negative	999	Foreigner
616	KCCR/KSH-159	F	35			ASHANTI	Asymptomatic	negative	999	Foreigner
617	KCCR/KSH-160	F	25			ASHANTI	cough	negative	999	Foreigner
618	KCCR/KSH-161	F	22			ASHANTI	Asymptomatic	negative	999	Foreigner
619	KCCR/KSH-162	F	21			ASHANTI	Asymptomatic	negative	999	Ghanaian
620	KCCR/KSH-163	F	28			ASHANTI	Asymptomatic	negative	999	Foreigner
621	KCCR/KSH-164	F	30			ASHANTI	Asymptomatic	negative	999	Foreigner
622	KCCR/KSH-165	F	23			ASHANTI	Asymptomatic	negative	999	Foreigner
623	KCCR/KSH-166	F	43			ASHANTI	Asymptomatic	negative	999	Foreigner
624	KCCR/KSH-167	M	39			ASHANTI	Asymptomatic	negative	999	Ghanaian
625	KCCR/KSH-168	F	32			ASHANTI	Asymptomatic	negative	999	Ghanaian
626	KCCR/KSH-169	F	34			ASHANTI	Asymptomatic	negative	999	Ghanaian
627	KCCR/KSH-170	M	31			ASHANTI	Asymptomatic	negative	999	Ghanaian
628	KCCR/KSH-171	M	28			ASHANTI	Asymptomatic	negative	999	Ghanaian
629	KCCR/KSH-172	F	26			ASHANTI	Asymptomatic	negative	999	Ghanaian
630	KCCR/KSH-173	F	20			ASHANTI	Asymptomatic	negative	999	Ghanaian
631	KCCR/KSH-174	M	45			ASHANTI	Asymptomatic	negative	999	Ghanaian
632	KCCR/KSH-175	M	45			ASHANTI	Asymptomatic	negative	999	Ghanaian
633	KCCR/KSH-176	M	25			ASHANTI	Asymptomatic	negative	999	Ghanaian
634	KCCR/KSH-177	F	28			ASHANTI	Asymptomatic	negative	999	Ghanaian
635	KCCR/KSH-178	F	39			ASHANTI	Asymptomatic	negative	999	Ghanaian
636	KCCR/KSH-179	F	39			ASHANTI	Asymptomatic	negative	999	Ghanaian
637	KCCR/KSH-180	M	-999			ASHANTI	General weakness, cough, sore throat, runny nose, shortness of breath, muscular pain	negative	999	Ghanaian
638	KCCR/KSH-181	F	33			ASHANTI	Asymptomatic	negative	999	Ghanaian
639	KCCR/KSH-182	F	35			ASHANTI	Asymptomatic	negative	999	Ghanaian
640	KCCR/KSH-183	M	27			ASHANTI	Asymptomatic	negative	999	Ghanaian
641	KCCR/KSH-184	M	-999			ASHANTI	Asymptomatic	negative	999	Ghanaian
642	KCCR/KSH-185	M	46			ASHANTI	Asymptomatic	negative	999	Ghanaian
643	KCCR/KSH-186	F	31			ASHANTI	Asymptomatic	negative	999	Ghanaian
644	KCCR/KSH-187	M	36			ASHANTI	Asymptomatic	negative	999	Ghanaian
645	KCCR/KSH-188	M	42			ASHANTI	Asymptomatic	negative	999	Ghanaian
646	KCCR/KSH-189	M	32			ASHANTI	Asymptomatic	negative	999	Ghanaian
647	KCCR/KSH-190	F	28			ASHANTI	Asymptomatic	negative	999	Ghanaian
648	KCCR/KSH-191	F	28			ASHANTI	Asymptomatic	negative	999	Ghanaian
649	KCCR/KSH-192	M	27			ASHANTI	Asymptomatic	negative	999	Ghanaian
650	KCCR/KSH-193	M	-999			ASHANTI	Asymptomatic	negative	999	Ghanaian
651	KCCR/KSH-194	M	28			ASHANTI	Asymptomatic	negative	999	Ghanaian
652	KCCR/KSH-195	M	-999			ASHANTI	Asymptomatic	negative	999	Ghanaian
653	KCCR/KSH-196	F	-999			ASHANTI	Asymptomatic	negative	999	Ghanaian
654	KCCR/KSH-197	F	-999			ASHANTI	Asymptomatic	negative	999	Ghanaian
655	KCCR/KSH-198	M	30			ASHANTI	Asymptomatic	negative	999	Ghanaian
656	KCCR/KSH-199	M	31			ASHANTI	Asymptomatic	negative	999	Ghanaian
657	KCCR/KSH-200	F	60			ASHANTI	General weakness	POSITIVE	999	Ghanaian
658	KCCR/KSH-201	M	-999			ASHANTI	Asymptomatic	negative	999	Ghanaian
659	KCCR/KSH-202	M	56			ASHANTI	Asymptomatic	negative	999	Ghanaian
660	KCCR/KSH-203	F	-999			ASHANTI	Asymptomatic	negative	999	Ghanaian
661	KCCR/KSH-204	M	-999			ASHANTI	Asymptomatic	negative	999	Ghanaian
662	KCCR/KSH-205	F	41			ASHANTI	Asymptomatic	negative	999	Ghanaian
663	KCCR/KSH-206	F	32			ASHANTI	Asymptomatic	negative	999	Ghanaian
664	KCCR/KSH-207	F	29			ASHANTI	Asymptomatic	negative	999	Ghanaian
665	KCCR/KSH-208	M	65			ASHANTI	Asymptomatic	POSITIVE	999	Ghanaian
666	KCCR/KSH-209	F	60			ASHANTI	Asymptomatic	negative	999	Ghanaian
667	KCCR/KSH-210	M	54			ASHANTI	Asymptomatic	negative	999	Ghanaian
668	KCCR/KSH-211	M	30			ASHANTI	Asymptomatic	negative	999	Ghanaian
669	KCCR/KSH-212	M	51			ASHANTI	Asymptomatic	negative	999	Ghanaian
670	KCCR/KSH-213	F	47			ASHANTI	Asymptomatic	negative	999	Ghanaian
671	KCCR/KSH-214	M	49			ASHANTI	Asymptomatic	negative	999	Ghanaian
672	KCCR/KSH-215	F	39			ASHANTI	Asymptomatic	negative	999	Ghanaian
673	KCCR/KSH-216	M	41			ASHANTI	Asymptomatic	negative	999	Ghanaian
674	KCCR/KSH-217	M	37			ASHANTI	Asymptomatic	negative	999	Ghanaian
675	KCCR/KSH-218	M	-999			ASHANTI	History of fever, cough, nausea, headache	negative	999	Ghanaian
676	KCCR/KSH-219	M	53			ASHANTI	Cough, sore throat	negative	999	Ghanaian
677	KCCR/KSH-220	F	36			ASHANTI	Asymptomatic	negative	999	Ghanaian
678	KCCR/KSH-221	M	31			ASHANTI	Asymptomatic	negative	999	Ghanaian
679	KCCR/KSH-222	M	25			ASHANTI	Asymptomatic	negative	999	Ghanaian
680	KCCR/KSH-223	F	27			ASHANTI	Asymptomatic	negative	999	Ghanaian
681	KCCR/KSH-224	F	-999			ASHANTI	Asymptomatic	negative	999	Ghanaian
682	KCCR/KSH-225	F	22			ASHANTI	cough	negative	999	Ghanaian
683	KCCR/KSH-226	F	20			ASHANTI	History of fever, general weakness, cough, headache	negative	999	Ghanaian
684	KCCR/KSH-227	F	-999			ASHANTI	History of fever, general weakness, cough, headache, muscular, chest, abdominal and joint pains	negative	999	Ghanaian
685	KCCR/KSH-228	M	25			ASHANTI	Asymptomatic	negative	999	Ghanaian
686	KCCR/KSH-229	M	43			ASHANTI	Asymptomatic	negative	999	Ghanaian
687	KCCR/KSH-230	M	32			ASHANTI	Asymptomatic	negative	999	Ghanaian
688	KCCR/KSH-231	F	29			ASHANTI	Asymptomatic	negative	999	Ghanaian
689	KCCR/KSH-232	M	-999			ASHANTI	Asymptomatic	negative	999	Ghanaian
690	KCCR/KSH-233	M	21			ASHANTI	Asymptomatic	negative	999	Ghanaian
691	KCCR/KSH-234	M	36			ASHANTI	Asymptomatic	negative	999	Ghanaian
692	KCCR/KSH-235	F	38			ASHANTI	Asymptomatic	negative	999	Ghanaian
693	KCCR/KSH-236	F	-999			ASHANTI	Asymptomatic	negative	999	Ghanaian
694	KCCR/KSH-237	F	22			ASHANTI	Asymptomatic	negative	999	Ghanaian
695	KCCR/KSH-238	M	28			ASHANTI	Asymptomatic	negative	999	Ghanaian
696	KCCR/KSH-239	F	21			ASHANTI	General weakness, cough, sore throat, shortness of breath	negative	999	Ghanaian
697	KCCR/KSH-240	M	37			ASHANTI	History of fever, general weakness, cough, joint pains	negative	999	Ghanaian
698	KCCR/KSH-241	M	47			ASHANTI	Asymptomatic	negative	999	Ghanaian
699	KCCR/KSH-242	F	32			ASHANTI	Asymptomatic	negative	999	Ghanaian
700	KCCR/KSH-243	M	67			ASHANTI	Asymptomatic	negative	999	Ghanaian
701	KCCR/KSH-244	F	19			ASHANTI	History of weakness	negative	999	Ghanaian
702	KCCR/KSH-245	M	-999			ASHANTI	Asymptomatic	negative	999	Ghanaian
703	KCCR/KSH-246	F	22			ASHANTI	History of weakness	negative	999	Ghanaian
704	KCCR/KSH-247	M	68			ASHANTI	Asymptomatic	negative	999	Ghanaian
705	KCCR/KSH-248	M	46			ASHANTI	Asymptomatic	negative	999	Ghanaian
706	KCCR/KSH-249	F	-999			ASHANTI	Asymptomatic	negative	999	Ghanaian
707	KCCR/KSH-250	F	60			ASHANTI	Asymptomatic	negative	999	Ghanaian
708	KCCR/KSH-251	F	25			ASHANTI	Asymptomatic	negative	999	Ghanaian
709	KCCR/KSH-252	M	60			ASHANTI	Asymptomatic	negative	999	Ghanaian
710	KCCR/KSH-253	M	48			ASHANTI	Asymptomatic	negative	999	Ghanaian
711	KCCR/KSH-254	F	30			ASHANTI	Sore throat, headache	negative	999	Ghanaian
712	KCCR/KSH-255	F	28			ASHANTI	Asymptomatic	negative	999	Ghanaian
713	KCCR/KSH-256	F	26			ASHANTI	Cough	negative	999	Ghanaian
714	KCCR/KSH-257	F	36			ASHANTI	Itching	negative	999	Ghanaian
715	KCCR/KSH-258	F	28			ASHANTI	Cough	negative	999	Ghanaian
716	KCCR/KSH-259	M	27			ASHANTI	Asymptomatic	negative	999	Ghanaian
717	KCCR/KSH-260	M	29			ASHANTI	Headache	negative	999	Ghanaian
718	KCCR/KSH-261	F	37			ASHANTI	Asymptomatic	negative	999	Ghanaian
719	KCCR/KSH-262	F	28			ASHANTI	Asymptomatic	negative	999	Ghanaian
720	KCCR/KSH-263	M	25			ASHANTI	Asymptomatic	negative	999	Ghanaian
721	KCCR/KSH-264	M	31			ASHANTI	History of fever, cough, headache	negative	999	Ghanaian
722	KCCR/KSH-265	F	30			ASHANTI	Nausea, headache	negative	999	Ghanaian
723	KCCR/KSH-266	F	23			ASHANTI	Sore throat, headache	negative	999	Ghanaian
724	KCCR/KSH-267	M	-999			ASHANTI	Asymptomatic	negative	999	Ghanaian
725	KCCR/KSH-268	M	-999			ASHANTI	cough, headache	negative	999	Ghanaian
726	KCCR/KSH-269	M	28			ASHANTI	runny nose, headache	negative	999	Ghanaian
727	KCCR/KSH-270	F	-999			ASHANTI	General weakness, Cough	negative	999	Ghanaian
728	KCCR/KSH-271	F	26			ASHANTI	Asymptomatic	negative	999	Ghanaian
729	KCCR/KSH-272	F	33			ASHANTI	Asymptomatic	negative	999	Ghanaian
730	KCCR/KSH-273	F	32			ASHANTI	Asymptomatic	negative	999	Ghanaian
731	KCCR/KSH-274	F	25			ASHANTI	Asymptomatic	negative	999	Ghanaian
732	KCCR/KSH-275	M	33			ASHANTI	History of fever, cough, anaemia, loss of sense of taste	POSITIVE	999	Ghanaian
733	KCCR/KSH-276	F	30			ASHANTI	Asymptomatic	negative	999	Ghanaian
734	KCCR/KSH-277	F	27			ASHANTI	Asymptomatic	negative	999	Ghanaian
735	KCCR/KSH-278	F	28			ASHANTI	Asymptomatic	negative	999	Ghanaian
736	KCCR/KSH-279	F	25			ASHANTI	Asymptomatic	negative	999	Ghanaian
737	KCCR/KSH-280	M	39			ASHANTI	Asymptomatic	negative	999	Ghanaian
738	KCCR/KSH-281	F	40			ASHANTI	Asymptomatic	negative	999	Ghanaian
739	KCCR/KSH-282	F	82			ASHANTI	Asymptomatic	negative	999	Ghanaian
740	KCCR/KSH-283	F	23			ASHANTI	Asymptomatic	negative	999	Ghanaian
741	KCCR/KSH-284	F	53			ASHANTI	Asymptomatic	negative	999	Ghanaian
742	KCCR/KSH-285	F	34			ASHANTI	Asymptomatic	negative	999	Ghanaian
743	KCCR/KSH-286	M	27			ASHANTI	Asymptomatic	negative	999	Ghanaian
744	KCCR/KSH-287	F	24			ASHANTI	Asymptomatic	negative	999	Ghanaian
745	KCCR/KSH-288	F	25			ASHANTI	Asymptomatic	negative	999	Ghanaian
746	KCCR/KSH-289	F	27			ASHANTI	Asymptomatic	negative	999	Ghanaian
747	KCCR/KSH-290	M	27			ASHANTI	History of chills	negative	999	Ghanaian
748	KCCR/KNUSTH-030	F	42			ASHANTI	Asymptomatic	negative	999	Ghanaian
749	KCCR/KNUSTH-031	F	63			ASHANTI	Asymptomatic	negative	999	Ghanaian
750	KCCR/KNUSTH-032	M	39			ASHANTI	Asymptomatic	negative	999	Ghanaian
751	KCCR/KATH-108	M	29			ASHANTI	Shortness of breath, cough	negative	999	Ghanaian
752	KCCR/KATH-109	M	24			ASHANTI	Asymptomatic	negative	999	Ghanaian
753	KCCR/KATH-110	M	31			ASHANTI	History of fever, General weakness, cough, sneezing	negative	999	Ghanaian
754	KCCR/KATH-111	F	60			ASHANTI	History of fever, shortness of breath	negative	999	Ghanaian
755	KCCR/KATH-112	F	39			ASHANTI	History of fever, cough, runny nose, diarrhoea, sneezing, fatigue	negative	999	Ghanaian
756	KCCR/KATH-113	M	26			ASHANTI	Asymptomatic	negative	999	Ghanaian
757	KCCR/OFM-027	F	31			ASHANTI	Asymptomatic	negative	999	Ghanaian
758	KCCR/OFM-028	F	21			ASHANTI	Asymptomatic	negative	999	Ghanaian
759	KCCR/OFM-029	F	-999	999	999	ASHANTI	Asymptomatic	negative	999	Ghanaian
760	KCCR/OFM-030	F	25			ASHANTI	Asymptomatic	negative	999	Ghanaian
761	KCCR/OFM-031	F	25			ASHANTI	Asymptomatic	negative	999	Ghanaian
762	KCCR/OFM-032	M	-999	999	999	ASHANTI	Asymptomatic	negative	999	Ghanaian
763	KCCR/OFM-033	F	33			ASHANTI	Asymptomatic	negative	999	Ghanaian
764	KCCR/OFM-034	F	36			ASHANTI	Asymptomatic	negative	999	Ghanaian
765	KCCR/OFM-035	F	52			ASHANTI	Asymptomatic	negative	999	Ghanaian
766	KCCR/OFM-036	F	38			ASHANTI	Asymptomatic	negative	999	Ghanaian
767	KCCR/OFM-037	F	38			ASHANTI	Asymptomatic	negative	999	Ghanaian
768	KCCR/OFM-038	F	41			ASHANTI	Asymptomatic	negative	999	Ghanaian
769	KCCR/MHA-003	F	103	999	999	ASHANTI	Cough, vomiting, confusion, fever	negative	999	Ghanaian
770	KCCR/UPE-021	M	34			UPPER EAST	History of fever, general weakness, cough, sore throat, shortness of breath, headache	negative	999	Ghanaian
771	KCCR/UPE-022	F	-999	999	999	UPPER EAST	History of fever, general weakness, cough, sore throat, shortness of breath, headache	negative	999	Ghanaian
772	KCCR/UPE-023	M	21			UPPER EAST	History of fever, general weakness, sore throat, shortness of breath, nausea, rashes	negative	999	Ghanaian
773	KCCR/UPE-024	F	42			UPPER EAST	General weakness, cough, shortness of breath, chest pains	negative	999	Ghanaian
774	KCCR/UPE-025	M	45			UPPER EAST	Asymptomatic	negative	999	Ghanaian
775	KCCR/UPE-026	F	24			UPPER EAST	Asymptomatic	negative	999	Ghanaian
776	KCCR/UPE-027	M	27			UPPER EAST	Asymptomatic	negative	999	Ghanaian
777	KCCR/UPE-028	F	-999			UPPER EAST	History of fever, General weakness, cough, shortness of breath	negative	999	Ghanaian
778	KCCR/CEN-008	M	-999			CENTRAL	runny nose, headache	negative	999	Foreigner
779	KCCR/CEN-009	M	-999			CENTRAL	Cough, Runny nose, headache	negative	999	Foreigner
780	KCCR/KATH-114	F	46			ASHANTI	History of fever, cough, pneumonia, post menopausal bleeding, uterine fibroid, severe anaemia	negative	999	Ghanaian
781	KCCR/TAM-001	F	58			NORTHERN	Asymptomatic	negative	999	Ghanaian
782	KCCR/TAM-002	M	46			NORTHERN	Asymptomatic	negative	999	Ghanaian
783	KCCR/TAM-003	M	47			NORTHERN	Asymptomatic	negative	999	Ghanaian
784	KCCR/TAM-004	M	49			NORTHERN	Asymptomatic	negative	999	Ghanaian
785	KCCR/TAM-005	M	34			NORTHERN	Asymptomatic	negative	999	Ghanaian
786	KCCR/TAM-006	M	37			NORTHERN	Asymptomatic	negative	999	Ghanaian
787	KCCR/TAM-007	M	35			NORTHERN	Asymptomatic	negative	999	Ghanaian
788	KCCR/TAM-008	M	32			NORTHERN	Asymptomatic	negative	999	Ghanaian
789	KCCR/TAM-009	M	19			NORTHERN	Asymptomatic	negative	999	Ghanaian
790	KCCR/TAM-010	M	30			NORTHERN	Asymptomatic	negative	999	Ghanaian
791	KCCR/TAM-011	M	48			NORTHERN	cough	negative	999	Ghanaian
792	KCCR/TAM-012	M	30			NORTHERN	Asymptomatic	negative	999	Ghanaian
793	KCCR/TAM-013	M	40			NORTHERN	Asymptomatic	negative	999	Ghanaian
794	KCCR/TAM-014	F	35			NORTHERN	Asymptomatic	negative	999	Ghanaian
795	KCCR/TAM-015	F	45			NORTHERN	Asymptomatic	negative	999	Ghanaian
796	KCCR/TAM-016	F	25			NORTHERN	Asymptomatic	negative	999	Ghanaian
797	KCCR/TAM-017	M	30			NORTHERN	Asymptomatic	negative	999	Ghanaian
798	KCCR/TAM-018	F	43			NORTHERN	Asymptomatic	negative	999	Ghanaian
799	KCCR/TAM-019	M	35			NORTHERN	Asymptomatic	negative	999	Ghanaian
800	KCCR/TAM-020	M	29			NORTHERN	Asymptomatic	negative	999	Ghanaian
801	KCCR/TAM-021	F	29			NORTHERN	Asymptomatic	negative	999	Ghanaian
802	KCCR/OMA-003	M	28			ASHANTI	History of fever, cough, sore throat, runny nose, diarrhoea, headache, chest and abdominal pain	negative	999	Ghanaian
803	KCCR/SR-005	M	42			SAVANNAH	Asymptomatic	negative	999	Ghanaian
804	KCCR/SR- 006	M	35			SAVANNAH	Asymptomatic	negative	999	Ghanaian
805	KCCR/OMA-002	M	38			ASHANTI	Asymptomatic	negative	999	Foreigner
806	KCCR/KWE-011	F	46			ASHANTI	Asymptomatic	negative	999	Ghanaian
807	KCCR/KWE-012	M	38			ASHANTI	Asymptomatic	negative	999	Ghanaian
808	KCCR/KWE-013	M	51			ASHANTI	Asymptomatic	negative	999	Ghanaian
809	KCCR/KWE-014	M	52			ASHANTI	Asymptomatic	negative	999	Ghanaian
810	KCCR/AGO-073	M	21			ASHANTI	History of Fever/Cough/Sore Throat/Shortness of breath	negative	999	Ghanaian
811	KCCR/AGO-074	M	29			ASHANTI	Asymptomatic	negative	999	Ghanaian
812	KCCR/AGO-075	M	32			ASHANTI	Asymptomatic	negative	999	Ghanaian
813	KCCR/AGO-076	M	32			ASHANTI	Asymptomatic	negative	999	Ghanaian
814	KCCR/AGO-077	M	44			ASHANTI	Asymptomatic	negative	999	Foreigner
815	KCCR/AGO-078	M	-999	999	999	ASHANTI	History of fever/Cough/Gneral weakness/Headache	negative	999	Foreigner
816	KCCR/AGO-079	M	28			ASHANTI	History of Fever/General Weakness/Cough/Sore throat/Shortness of breath/Headache	negative	999	Ghanaian
817	KCCR/BE-007	M	63			BONO EAST	History of Fever/Cough/Runny nose	negative	999	Ghanaian
818	KCCR/BE-008	M	21			BONO EAST	History of Fever/Shortness of breath/ Headache	negative	999	Ghanaian
819	KCCR/TTH-080	M	28			NORTHERN	Cough/Sore throat/ Shortness	negative	999
820	KCCR/TTH-081	M	34			NORTHERN	General Weakness/Sorethroat/Headache/Pain	negative	999
821	KCCR/TTH-082	M	35			NORTHERN	Asymptomatic	negative	999
822	KCCR/TTH-083	M	33			NORTHERN	Asymptomatic	negative	999	Ghanaian
823	KCCR/TTH-084	M	37			NORTHERN	Asymptomatic	negative	999	Ghanaian
824	KCCR/TTH-085	M	41			NORTHERN	Asymptomatic	negative	999	Ghanaian
825	KCCR/TTH-086	M	42			NORTHERN	Asymptomatic	negative	999	Ghanaian
826	KCCR/TTH-087	M	30			NORTHERN	Asymptomatic	negative	999	Ghanaian
827	KCCR/TTH-088	M	35			NORTHERN	Asymptomatic	negative	999	Ghanaian
828	KCCR/TTH-089	M	35			NORTHERN	Asymptomatic	negative	999	Ghanaian
829	KCCR/TTH-090	M	22			NORTHERN	Asymptomatic	negative	999	Ghanaian
830	KCCR/TTH-091	F	2			NORTHERN	History of fever/ Cough/ Shortness of breath	negative	999	Ghanaian
831	KCCR/TTH-092	M	30			NORTHERN	Asymptomatic	negative	999	Ghanaian
832	KCCR/TTH-093	F	27			NORTHERN	History of fever/ General weaknes/ Cough/ Shortness of breath/ Diarrhoea	negative	999	Ghanaian
833	KCCR/AMP-004	M	22			ASHANTI	Asymptomatic	negative	999	Ghanaian
834	KCCR/AMP-005	F	60			ASHANTI	Asymptomatic	negative	999	Ghanaian
835	KCCR/AMP-006	M	64			ASHANTI	Asymptomatic	negative	999	Ghanaian
836	KCCR/AMP-007	M	33			ASHANTI	Asymptomatic	negative	999	Ghanaian
837	KCCR/AMP-008	F	56			ASHANTI	Asymptomatic	negative	999	Ghanaian
838	KCCR/AMP-009	M	23			ASHANTI	Asymptomatic	negative	999	Ghanaian
839	KCCR/AMP-010	M	70			ASHANTI	Asymptomatic	negative	999	Ghanaian
840	KCCR/AMP-011	M	46			ASHANTI	Asymptomatic	negative	999	Ghanaian
841	KCCR/AMP-012	M	35			ASHANTI	Asymptomatic	negative	999	Ghanaian
842	KCCR/AMP-013	M	36			ASHANTI	Asymptomatic	negative	999	Ghanaian
843	KCCR/AMP-014	M	19			ASHANTI	Asymptomatic	negative	999	Ghanaian
844	KCCR/AMP-015	M	43			ASHANTI	Asymptomatic	negative	999	Ghanaian
845	KCCR/AMP-016	F	24			ASHANTI	Cough, sore throat, runny nose, headache	negative	999	Ghanaian
846	KCCR/AMP-017	M	42			ASHANTI	Asymptomatic	negative	999	Ghanaian
847	KCCR/AMP-018	M	28			ASHANTI	Asymptomatic	negative	999	Ghanaian
848	KCCR/KATH-115	F	22			ASHANTI	History of fever, cough, shortness of breath	negative	999	Ghanaian
849	KCCR/SR-004	F	33			SAVANNAH	History of fever, cough, shortness of breath	negative	999	Ghanaian
850	KCCR/BOS-005	F	60			ASHANTI	Cough	negative	999	Ghanaian
851	KCCR/BOS-006	F	87			ASHANTI	Cough	negative	999	Ghanaian
852	KCCR/BOS-007	F	59			ASHANTI	Cough	negative	999	Ghanaian
853	KCCR/BOS-008	F	58			ASHANTI	Cough	negative	999	Ghanaian
854	KCCR/BOS-009	F	39			ASHANTI	Cough	negative	999	Ghanaian
855	KCCR/BOS-010	M	65			ASHANTI	Cough	negative	999	Ghanaian
856	KCCR/BOS-011	F	38			ASHANTI	Cough	negative	999	Ghanaian
857	KCCR/BOS-012	F	61			ASHANTI	Asymptomatic	negative	999	Ghanaian
858	KCCR/BOS-013	F	38			ASHANTI	Asymptomatic	negative	999	Ghanaian
859	KCCR/BOS-014	M	36			ASHANTI	Asymptomatic	negative	999	Ghanaian
860	KCCR/BOS-015	M	38			ASHANTI	History of Fever/ General Weakness/ Cough/ Runny nose/ Nausea/ Chest pain	negative	999	Ghanaian
861	KCCR/BOS-016	M	15			ASHANTI	General Weakness/ Cough/ Headache	negative	999	Ghanaian
862	KCCR/BOS-017	M	32			ASHANTI	Cough	negative	999	Ghanaian
863	KCCR/BOS-018	F	39			ASHANTI	Cough	negative	999	Ghanaian
864	KCCR/KATH-116	F	26			ASHANTI	History of fever, general weakness, cough, shortness of breath	negative	999	Ghanaian
865	KCCR/KATH-117	M	46			ASHANTI	Shortness of breath	negative	999	Ghanaian
866	KCCR/KATH-118	M	40			ASHANTI	History of fever, cough, shortness of breath, fatigue	negative	999	Ghanaian
867	KCCR/KATH-119	M	64			ASHANTI	History of fever, cough, shortness	negative	999	Ghanaian
868	KCCR/AHF-004	F	49			AHAFO	Cough	negative	999	Ghanaian
869	KCCR/KSH-291	F	27			ASHANTI	cough, headache	negative	999	Ghanaian
870	KCCR/KSH-292	M	25			ASHANTI	general weakness, sore throat, shortness of breath	negative	999	Ghanaian
871	KCCR/KSH-293	M	-999	999	999	ASHANTI	Asymptomatic	negative	999	Ghanaian
872	KCCR/KSH-294	M	50			ASHANTI	cough, sore throat, headache	negative	999	Ghanaian
873	KCCR/KSH-295	M	-999	999	999	ASHANTI	history of fever, cough, shortness of breath, headache, muscular and chest pains	negative	999	Ghanaian
874	KCCR/KSH-296	F	56			ASHANTI	Asymptomatic	negative	999	Ghanaian
875	KCCR/KSH-297	M	52			ASHANTI	General weakness, cough, shortness of breath, chest pains	negative	999	Ghanaian
876	KCCR/KSH-298	M	33			ASHANTI	Asymptomatic	negative	999	Ghanaian
877	KCCR/KSH-299	M	-999			ASHANTI	Asymptomatic	negative	999	Ghanaian
878	KCCR/KSH-300	F	27			ASHANTI	History of fever, cough, shortness of breath	negative	999	Ghanaian
879	KCCR/OFM-039	M	44			ASHANTI	Asymptomatic	negative	999	Ghanaian
880	KCCR/OFM-040	F	28			ASHANTI	Asymptomatic	negative	999	Ghanaian
881	KCCR/OFM-041	F	31			ASHANTI	Asymptomatic	negative	999	Ghanaian
882	KCCR/OFM-042	M	27			ASHANTI	Asymptomatic	negative	999	Ghanaian
883	KCCR/OFM-043	F	32			ASHANTI	Asymptomatic	negative	999	Ghanaian
884	KCCR/OFM-044	F	33			ASHANTI	Asymptomatic	negative	999	Ghanaian
885	KCCR/OFM-045	M	60			ASHANTI	Asymptomatic	negative	999	Ghanaian
886	KCCR/OFM-046	M	61			ASHANTI	Asymptomatic	negative	999	Ghanaian
887	KCCR/OFM-047	M	59			ASHANTI	Asymptomatic	negative	999	Ghanaian
888	KCCR/OFM-048	F	59			ASHANTI	Asymptomatic	negative	999	Ghanaian
889	KCCR/OFM-049	M	23			ASHANTI	Asymptomatic	negative	999	Ghanaian
890	KCCR/OFM-050	M	55			ASHANTI	Asymptomatic	negative	999	Ghanaian
891	KCCR/OFM-051	F	-999			ASHANTI	Asymptomatic	negative	999	Ghanaian
892	KCCR/OFM-052	M	45			ASHANTI	Asymptomatic	negative	999	Ghanaian
893	KCCR/OFM-053	M	19			ASHANTI	Asymptomatic	negative	999	Ghanaian
894	KCCR/OFM-054	F	41			ASHANTI	Asymptomatic	negative	999	Ghanaian
895	KCCR/OFM-055	M	15			ASHANTI	Asymptomatic	negative	999	Ghanaian
896	KCCR/OFM-056	F	19			ASHANTI	Asymptomatic	negative	999	Ghanaian
897	KCCR/OFM-057	F	23			ASHANTI	Asymptomatic	negative	999	Ghanaian
898	KCCR/OFM-058	M	8			ASHANTI	Asymptomatic	negative	999	Ghanaian
899	KCCR/OHD-001	M	26			ASHANTI	Asymptomatic	negative	999	Ghanaian
900	KCCR/OHD-002	F	16			ASHANTI	Asymptomatic	negative	999	Ghanaian
901	KCCR/OHD-003	M	45			ASHANTI	Asymptomatic	negative	999	Ghanaian
902	KCCR/OHD-004	F	46			ASHANTI	Asymptomatic	negative	999	Ghanaian
903	KCCR/OHD-005	M	38			ASHANTI	Asymptomatic	negative	999	Ghanaian
904	KCCR/OHD-006	F	26			ASHANTI	Asymptomatic	negative	999	Ghanaian
905	KCCR/OHD-007	M	59			ASHANTI	Asymptomatic	negative	999	Ghanaian
906	KCCR/OHD-008	M	16			ASHANTI	Asymptomatic	negative	999	Ghanaian
907	KCCR/OHD-009	M	42			ASHANTI	Asymptomatic	negative	999	Ghanaian
908	KCCR/OHD-010	F	39			ASHANTI	Asymptomatic	negative	999	Ghanaian
909	KCCR/OHD-011	F	54			ASHANTI	Asymptomatic	negative	999	Ghanaian
910	KCCR/OHD-012	F	26			ASHANTI	Asymptomatic	negative	999	Ghanaian
911	KCCR/OHD-013	M	32			ASHANTI	Asymptomatic	negative	999	Ghanaian
912	KCCR/OHD-014	F	44			ASHANTI	Asymptomatic	negative	999	Ghanaian
913	KCCR/OHD-015	F	34			ASHANTI	Asymptomatic	negative	999	Ghanaian
914	KCCR/OHD-016	M	28			ASHANTI	Asymptomatic	negative	999	Ghanaian
915	KCCR/OHD-017	F	16			ASHANTI	Asymptomatic	negative	999	Ghanaian
916	KCCR/OHD-018	F	23			ASHANTI	Asymptomatic	negative	999	Ghanaian
917	KCCR/OHD-019	M	31			ASHANTI	Asymptomatic	negative	999	Ghanaian
918	KCCR/OHD-020	F	31			ASHANTI	Asymptomatic	negative	999	Ghanaian
919	KCCR/OHD-021	M	12			ASHANTI	Asymptomatic	negative	999	Ghanaian
920	KCCR/OHD-022	F	22			ASHANTI	Asymptomatic	negative	999	Ghanaian
921	KCCR/OHD-023	F	21			ASHANTI	Asymptomatic	negative	999	Ghanaian
922	KCCR/OHD-024	F	20			ASHANTI	Asymptomatic	negative	999	Ghanaian
923	KCCR/OHD-025	M	46			ASHANTI	Asymptomatic	negative	999	Ghanaian
924	KCCR/OHD-026	F	32			ASHANTI	General weakness, headache	negative	999	Ghanaian
925	KCCR/OHD-027	M	39			ASHANTI	General weakness, headache, muscular pain	negative	999	Ghanaian
926	KCCR/OHD-028	F	40			ASHANTI	Asymptomatic	negative	999	Ghanaian
927	KCCR/OHD-029	F	24			ASHANTI	Asymptomatic	negative	999	Ghanaian
928	KCCR/OHD-030	F	56			ASHANTI	Asymptomatic	negative	999	Ghanaian
929	KCCR/OHD-031	F	32			ASHANTI	Asymptomatic	negative	999	Ghanaian
930	KCCR/OHD-032	F	46			ASHANTI	Asymptomatic	negative	999	Ghanaian
931	KCCR/OHD-033	F	41			ASHANTI	Asymptomatic	negative	999	Ghanaian
932	KCCR/OHD-034	F	34			ASHANTI	Asymptomatic	negative	999	Ghanaian
933	KCCR/OHD-035	M	35			ASHANTI	General weakness, shortness of breath,Diarrhoea, headache, muscular and chest pain	negative	999	Ghanaian
934	KCCR/OHD-036	M	14			ASHANTI	Asymptomatic	negative	999	Ghanaian
935	KCCR/OHD-037	F	32			ASHANTI	Asymptomatic	negative	999	Ghanaian
936	KCCR/OHD-038	M	32			ASHANTI	Asymptomatic	negative	999	Ghanaian
937	KCCR/OHD-039	M	55			ASHANTI	Asymptomatic	negative	999	Ghanaian
938	KCCR/OHD-040	M	13			ASHANTI	Diarrhoea	negative	999	Ghanaian
939	KCCR/OHD-041	F	26			ASHANTI	Cough	negative	999	Ghanaian
940	KCCR/OHD-042	F	55			ASHANTI	Cough, runny nose, headache	negative	999	Ghanaian
941	KCCR/OHD-043	M	41			ASHANTI	Asymptomatic	negative	999	Ghanaian
942	KCCR/OHD-044	F	38			ASHANTI	Asymptomatic	negative	999	Ghanaian
943	KCCR/OHD-045	M	21			ASHANTI	Headache	negative	999	Ghanaian
944	KCCR/OHD-046	M	24			ASHANTI	Asymptomatic	negative	999	Ghanaian
945	KCCR/OHD-047	M	17			ASHANTI	Asymptomatic	negative	999	Ghanaian
946	KCCR/OHD-048	F	22			ASHANTI	Asymptomatic	negative	999	Ghanaian
947	KCCR/OHD-049	F	19			ASHANTI	Asymptomatic	negative	999	Ghanaian
948	KCCR/OHD-050	F	37			ASHANTI	Asymptomatic	negative	999	Ghanaian
949	KCCR/OHD-051	M	24			ASHANTI	Asymptomatic	negative	999	Ghanaian
950	KCCR/OHD-052	M	23			ASHANTI	Asymptomatic	negative	999	Ghanaian
951	KCCR/KSI-001	F	34			ASHANTI	Asymptomatic	negative	999	Ghanaian
952	KCCR/KSI-002	F	31			ASHANTI	Asymptomatic	negative	999	Ghanaian
953	KCCR/KSI-003	M	30			ASHANTI	Asymptomatic	negative	999	Ghanaian
954	KCCR/KSI-004	M	44			ASHANTI	Asymptomatic	negative	999	Ghanaian
955	KCCR/KSI-005	F	19			ASHANTI	Asymptomatic	negative	999	Ghanaian
956	KCCR/KSI-006	F	30			ASHANTI	Asymptomatic	negative	999	Ghanaian
957	KCCR/KSI-007	F	26			ASHANTI	Asymptomatic	negative	999	Ghanaian
958	KCCR/KSI-008	F	41			ASHANTI	Asymptomatic	negative	999	Ghanaian
959	KCCR/KSI-009	F	41			ASHANTI	Asymptomatic	negative	999	Ghanaian
960	KCCR/KSI-010	M	49			ASHANTI	Asymptomatic	negative	999	Ghanaian
961	KCCR/KSI-011	M	57			ASHANTI	Asymptomatic	negative	999	Ghanaian
962	KCCR/KSI-012	F	36			ASHANTI	Asymptomatic	negative	999	Ghanaian
963	KCCR/KSI-013	F	47			ASHANTI	Asymptomatic	negative	999	Ghanaian
964	KCCR/KSI-014	F	37			ASHANTI	Asymptomatic	negative	999	Ghanaian
965	KCCR/KSI-015	M	41			ASHANTI	Asymptomatic	negative	999	Ghanaian
966	KCCR/KSI-016	F	30			ASHANTI	Asymptomatic	negative	999	Ghanaian
967	KCCR/KSI-017	M	33			ASHANTI	Asymptomatic	negative	999	Ghanaian
968	KCCR/KSI-018	F	29			ASHANTI	Asymptomatic	negative	999	Ghanaian
969	KCCR/KSI-019	F	73			ASHANTI	Asymptomatic	negative	999	Ghanaian
970	KCCR/KSI-020	F	26			ASHANTI	Asymptomatic	negative	999	Ghanaian
971	KCCR/KSI-021	M	38			ASHANTI	Asymptomatic	negative	999	Ghanaian
972	KCCR/KSI-022	M	38			ASHANTI	Asymptomatic	negative	999	Ghanaian
973	KCCR/KSI-023	F	62			ASHANTI	Asymptomatic	negative	999	Ghanaian
974	KCCR/KSI-024	F	23			ASHANTI	Asymptomatic	negative	999	Ghanaian
975	KCCR/KSI-025	M	37			ASHANTI	Asymptomatic	negative	999	Ghanaian
976	KCCR/KSI-026	F	62			ASHANTI	Asymptomatic	negative	999	Ghanaian
977	KCCR/KSI-027	M	36			ASHANTI	Asymptomatic	negative	999	Ghanaian
978	KCCR/KSI-028	F	27			ASHANTI	Asymptomatic	negative	999	Ghanaian
979	KCCR/KSI-029	F	33			ASHANTI	Asymptomatic	negative	999	Ghanaian
980	KCCR/KSI-030	F	58			ASHANTI	Asymptomatic	negative	999	Ghanaian
981	KCCR/KSI-031	F	41			ASHANTI	Asymptomatic	negative	999	Ghanaian
982	KCCR/KSI-032	M	44			ASHANTI	Asymptomatic	negative	999	Ghanaian
983	KCCR/KSI-033	F	32			ASHANTI	Asymptomatic	negative	999	Ghanaian
984	KCCR/KSI-034	F	42			ASHANTI	Asymptomatic	negative	999	Ghanaian
985	KCCR/KSI-035	F	50			ASHANTI	Asymptomatic	negative	999	Ghanaian
986	KCCR/KSI-036	M	73			ASHANTI	Asymptomatic	negative	999	Ghanaian
987	KCCR/KSI-037	F	27			ASHANTI	Asymptomatic	negative	999	Ghanaian
988	KCCR/KSI-038	F	73			ASHANTI	Asymptomatic	negative	999	Ghanaian
989	KCCR/KSI-039	F	41			ASHANTI	Asymptomatic	negative	999	Ghanaian
990	KCCR/KSI-040	M	47			ASHANTI	Asymptomatic	negative	999	Ghanaian
991	KCCR/KSI-041	F	21			ASHANTI	Asymptomatic	negative	999	Ghanaian
992	KCCR/KSI-042	M	88			ASHANTI	Asymptomatic	negative	999	Ghanaian
993	KCCR/KSI-043	F	44			ASHANTI	Asymptomatic	negative	999	Ghanaian
994	KCCR/KSI-044	F	72			ASHANTI	Asymptomatic	negative	999	Ghanaian
995	KCCR/KSI-045	M	45			ASHANTI	Asymptomatic	negative	999	Ghanaian
996	KCCR/KSI-046	F	70			ASHANTI	Asymptomatic	negative	999	Ghanaian
997	KCCR/KSI-047	M	29			ASHANTI	Asymptomatic	negative	999	Ghanaian
998	KCCR/KSI-048	M	63			ASHANTI	Asymptomatic	negative	999	Ghanaian
-999	KCCR/KSI-049	M	44			ASHANTI	Asymptomatic	negative	999	Ghanaian
1000	KCCR/KSI-050	M	29			ASHANTI	Asymptomatic	negative	999	Ghanaian
1001	KCCR/KSI-051	F	19			ASHANTI	Asymptomatic	negative	999	Ghanaian
1002	KCCR/KSI-052	F	46			ASHANTI	Asymptomatic	negative	999	Ghanaian
1003	KCCR/KSI-053	M	15			ASHANTI	Asymptomatic	negative	999	Ghanaian
1004	KCCR/KSI-054	M	24			ASHANTI	Asymptomatic	negative	999	Ghanaian
1005	KCCR/KSI-055	F	18			ASHANTI	Asymptomatic	negative	999	Ghanaian
1006	KCCR/KSI-056	M	46			ASHANTI	Asymptomatic	negative	999	Ghanaian
1007	KCCR/KSI-057	M	65			ASHANTI	Asymptomatic	negative	999	Ghanaian
1008	KCCR/KSI-058	F	60			ASHANTI	Asymptomatic	negative	999	Ghanaian
1009	KCCR/KSI-059	F	42			ASHANTI	Asymptomatic	negative	999	Ghanaian
1010	KCCR/KSI-060	F	13			ASHANTI	Asymptomatic	negative	999	Ghanaian
1011	KCCR/KSI-061	F	36			ASHANTI	Asymptomatic	negative	999	Ghanaian
1012	KCCR/KSI-062	F	22			ASHANTI	Asymptomatic	negative	999	Ghanaian
1013	KCCR/KSI-063	F	40			ASHANTI	Asymptomatic	negative	999	Ghanaian
1014	KCCR/KSI-064	M	45			ASHANTI	Asymptomatic	negative	999	Ghanaian
1015	KCCR/KSI-065	M	42			ASHANTI	Asymptomatic	negative	999	Ghanaian
1016	KCCR/KSI-066	F	29			ASHANTI	Asymptomatic	negative	999	Ghanaian
1017	KCCR/KSI-067	F	19			ASHANTI	Asymptomatic	negative	999	Ghanaian
1018	KCCR/KSI-068	M	30			ASHANTI	Asymptomatic	negative	999	Ghanaian
1019	KCCR/KSI-069	M	39			ASHANTI	Asymptomatic	negative	999	Ghanaian
1020	KCCR/KSI-070	M	51			ASHANTI	Asymptomatic	negative	999	Ghanaian
63032	KCCR/SGH-3320	M	41			ASHANTI	Asymptomatic	negative	999	Ghanaian
56331	KCCR/SGH-2800	M	39			ASHANTI	Asymptomatic	negative	999	Ghanaian
23872	KCCR/SGH-1672	M	20			ASHANTI	Asymptomatic	negative	999	Ghanaian
63135	KCCR/SGH-3359	M	79			ASHANTI	Asymptomatic	negative	999	Ghanaian
45701	KCCR/SGH-2602	M	53			ASHANTI	General weakness,shortness of breath	negative	999	Ghanaian
12023	KCCR/SGH-1027	M	34			ASHANTI	Asymptomatic	negative	999	Ghanaian
17136	KCCR/SGH-1333	M	44			ASHANTI	Asymptomatic	negative	999	Ghanaian
17164	KCCR/SGH-1361	M	50			ASHANTI	Asymptomatic	negative	999	Ghanaian
19166	KCCR/KSH-667	M	40			ASHANTI	Asymptomatic	negative	999	Ghanaian
58801	KCCR/SGH-2940	M	60			ASHANTI	History of fever,general weakness,cough,muscular and chest pain	negative	999	Ghanaian
58405	KCCR/SGH-2866	M	43			ASHANTI	Asymptomatic	negative	999	Ghanaian
62348	KCCR/SGH-3287	M	53			ASHANTI	General weakness,cough,shortness of breath,headache	POSITIVE	38.08	Ghanaian
5762	KCCR/SGH-518	M	61			ASHANTI	Asymptomatic	negative	999	Ghanaian
8243	KCCR/SGH-684	M	40			ASHANTI	Asymptomatic	negative	999	Ghanaian
1049	KCCR/SGH-063	M	80			ASHANTI	Asymptomatic	negative	999	Ghanaian
32451	KCCR/SGH-2260	M	41			ASHANTI	Sore throat	negative	999	Ghanaian
32355	KCCR/SGH-2164	M	48			ASHANTI	Asymptomatic	negative	999	Ghanaian
23813	KCCR/SGH-1516	M	41			ASHANTI	Asymptomatic	negative	999	Ghanaian
27358	KCCR/SGH-1583A	M	-999			ASHANTI	Asymptomatic	negative	999	Ghanaian
12029	KCCR/SGH-1032	M	37			ASHANTI	Asymptomatic	negative	999	Ghanaian
18928	KCCR/SGH-1440	M	38			ASHANTI	Asymptomatic	negative	999	Ghanaian
59826	KCCR/SGH-3010	M	20			ASHANTI	Asymptomatic	negative	999	Ghanaian
67421	KCCR/SGH-3595	M	31			ASHANTI	Asymptomatic	negative	999	Ghanaian
11009	KCCR/SGH-956	M	41			ASHANTI	Asymptomatic	negative	999	Ghanaian
56345	KCCR/SGH-2814	F	20			ASHANTI	Asymptomatic	negative	999	Ghanaian
59785	KCCR/SGH-2969	M	42			ASHANTI	Muscular pain	negative	999	Ghanaian
62107	KCCR/SGH-3259	F	80			ASHANTI	Runny nose, headache	POSITIVE	23.72	Ghanaian
25617	KCCR/SGH-1730A	F	37			ASHANTI	Asymptomatic	negative	999	Ghanaian
60093	KCCR/SGH-3055	F	79			ASHANTI	General weakness	negative	999	Ghanaian
3208	KCCR/SGH-177	F	65			ASHANTI	Asymptomatic	negative	999	Ghanaian
10904	KCCR/SGH-851	F	49			ASHANTI	Asymptomatic	negative	999	Ghanaian
12108	KCCR/SGH-1112	F	80			ASHANTI	Asymptomatic	negative	999	Ghanaian
62105	KCCR/SGH-3257	F	48			ASHANTI	Cough,sore throat, runny nose	POSITIVE	25.75	Ghanaian
62104	KCCR/SGH-3256	F	72			ASHANTI	History of fever/chills, cough	POSITIVE	38.49	Ghanaian
8262	KCCR/SGH-703	F	51			ASHANTI	Asymptomatic	negative	999	Ghanaian
3213	KCCR/SGH-182	F	44			ASHANTI	Asymptomatic	negative	999	Ghanaian
1422	KCCR/KSI-124	F	36			ASHANTI	Cough	negative	999	Ghanaian
10883	KCCR/SGH-830	F	60			ASHANTI	Asymptomatic	negative	999	Ghanaian
10908	KCCR/SGH-855	F	39			ASHANTI	Asymptomatic	negative	999	Ghanaian
71460	KCCR/SGH-3798	M	49			ASHANTI	Asymptomatic	POSITIVE	999	Ghanaian
59907	KCCR/SGH-3039	M	29			ASHANTI	Asymptomatic	negative	999	Ghanaian
23809	KCCR/SGH-1512 A	F	39			ASHANTI	Asymptomatic	negative	999	Ghanaian
58763	KCCR/SGH-2902	M	26			ASHANTI	Asymptomatic	negative	999	Ghanaian
57057	KCCR/SGH-2838	M	58			ASHANTI	Headache	negative	999	Ghanaian
1022	KCCR/SGH-036	M	48			ASHANTI	Asymptomatic	negative	999	Ghanaian
1026	KCCR/SGH-040	M	30			ASHANTI	Asymptomatic	negative	999	Ghanaian
1073	KCCR/AMP-019	F	50			ASHANTI	Asymptomatic	negative	999	Ghanaian
1074	KCCR/KSH-301	F	33			ASHANTI	Asymptomatic	negative	999	Ghanaian
1075	KCCR/KSH-302	F	33			ASHANTI	Asymptomatic	negative	999	Ghanaian
1076	KCCR/KSH-303	M	67			ASHANTI	Asymptomatic	negative	999	Ghanaian
1077	KCCR/KSH-304	M	40			ASHANTI	Asymptomatic	negative	999	Ghanaian
1078	KCCR/KSH-305	M	20			ASHANTI	Asymptomatic	negative	999	Ghanaian
1079	KCCR/KSH-306	M	32			ASHANTI	Asymptomatic	negative	999	Ghanaian
1080	KCCR/KSH-307	M	19			ASHANTI	Asymptomatic	negative	999	Ghanaian
1081	KCCR/KSH-308	M	30			ASHANTI	Asymptomatic	negative	999	Ghanaian
1082	KCCR/KSH-309	M	17			ASHANTI	Asymptomatic	negative	999	Ghanaian
1083	KCCR/KSH-310	M	15			ASHANTI	Asymptomatic	negative	999	Ghanaian
1084	KCCR/KSH-311	M	24			ASHANTI	Asymptomatic	negative	999	Ghanaian
1085	KCCR/KSH-312	M	20			ASHANTI	Asymptomatic	negative	999	Ghanaian
1086	KCCR/KSH-313	F	23			ASHANTI	Asymptomatic	negative	999	Ghanaian
1087	KCCR/KSH-314	M	23			ASHANTI	Asymptomatic	negative	999	Ghanaian
1088	KCCR/KSH-315	M	16			ASHANTI	Asymptomatic	negative	999	Ghanaian
1089	KCCR/KSH-316	M	22			ASHANTI	Asymptomatic	negative	999	Ghanaian
1090	KCCR/KSH-317	M	29			ASHANTI	Asymptomatic	negative	999	Ghanaian
1091	KCCR/KSH-318	M	19			ASHANTI	Asymptomatic	negative	999	Ghanaian
1092	KCCR/KSH-319	M	21			ASHANTI	Asymptomatic	negative	999	Ghanaian
1093	KCCR/KSH-320	M	22			ASHANTI	Asymptomatic	negative	999	Ghanaian
1094	KCCR/KSH-321	M	26			ASHANTI	Asymptomatic	negative	999	Ghanaian
1095	KCCR/KSH-322	M	30			ASHANTI	Asymptomatic	negative	999	Ghanaian
1096	KCCR/KSH-323	M	20			ASHANTI	Asymptomatic	negative	999	Ghanaian
1097	KCCR/KSH-324	M	37			ASHANTI	Asymptomatic	negative	999	Ghanaian
1098	KCCR/KSH-325	M	25			ASHANTI	Asymptomatic	negative	999	Ghanaian
1099	KCCR/KSH-326	M	24			ASHANTI	Asymptomatic	negative	999	Ghanaian
1100	KCCR/KSH-327	M	36			ASHANTI	Asymptomatic	negative	999	Ghanaian
1101	KCCR/KSH-328	M	28			ASHANTI	Asymptomatic	negative	999	Ghanaian
1102	KCCR/KSH-329	M	24			ASHANTI	Asymptomatic	negative	999	Ghanaian
1103	KCCR/KSH-330	M	27			ASHANTI	Asymptomatic	negative	999	Ghanaian
1104	KCCR/KSH-331	M	28			ASHANTI	Asymptomatic	negative	999	Ghanaian
1105	KCCR/KSH-332	M	23			ASHANTI	Asymptomatic	negative	999	Ghanaian
1106	KCCR/KSH-333	M	20			ASHANTI	Asymptomatic	negative	999	Ghanaian
1107	KCCR/KSH-334	M	40			ASHANTI	Asymptomatic	negative	999	Ghanaian
1108	KCCR/KSH-335	M	43			ASHANTI	Asymptomatic	negative	999	Ghanaian
1109	KCCR/KSH-336	M	27			ASHANTI	Asymptomatic	negative	999	Ghanaian
1110	KCCR/KSH-337	F	56			ASHANTI	Asymptomatic	negative	999	Ghanaian
1111	KCCR/KSH-338	M	22			ASHANTI	Asymptomatic	negative	999	Ghanaian
1112	KCCR/KSH-339	M	60			ASHANTI	Asymptomatic	negative	999	Ghanaian
1113	KCCR/KSH-340	M	42			ASHANTI	Asymptomatic	negative	999	Ghanaian
1114	KCCR/KSH-341	F	60			ASHANTI	muscular pain	negative	999	Ghanaian
1115	KCCR/KSH-342	M	52			ASHANTI	Abdominal pain	negative	999	Ghanaian
1116	KCCR/KSH-343	F	20			ASHANTI	Cough, sore throat, runny nose, headache, muscular pain	negative	999	Ghanaian
1117	KCCR/KSH-344	M	60			ASHANTI	Chest pain	negative	999	Ghanaian
1118	KCCR/KSH-345	M	31			ASHANTI	General weakness, cough, sore throat, headache, muscular pain	negative	999	Ghanaian
1119	KCCR/KSH-346	F	85			ASHANTI	Abdominal pain	negative	999	Ghanaian
1120	KCCR/KSH-347	F	57			ASHANTI	Asymptomatic	negative	999	Ghanaian
1121	KCCR/KSH-348	F	41			ASHANTI	muscular and abdominal pain	negative	999	Ghanaian
1122	KCCR/KSH-349	M	20			ASHANTI	Muscular pain	negative	999	Ghanaian
1123	KCCR/KSH-350	M	67			ASHANTI	Asymptomatic	negative	999	Ghanaian
1124	KCCR/KSH-351	F	44			ASHANTI	General weakness	negative	999	Ghanaian
1125	KCCR/KSH-352	F	45			ASHANTI	Asymptomatic	negative	999	Ghanaian
1126	KCCR/KSH-353	M	79			ASHANTI	Headache	negative	999	Ghanaian
1127	KCCR/KSH-354	M	27			ASHANTI	Headache, abdominal pain	negative	999	Ghanaian
1128	KCCR/KSH-355	M	36			ASHANTI	Cough	negative	999	Ghanaian
1129	KCCR/KSH-356	M	48			ASHANTI	Asymptomatic	negative	999	Ghanaian
1130	KCCR/KSH-357	M	25			ASHANTI	Asymptomatic	negative	999	Ghanaian
1131	KCCR/KSH-358	F	25			ASHANTI	Asymptomatic	negative	999	Ghanaian
1132	KCCR/KSH-359	F	25			ASHANTI	Asymptomatic	negative	999	Ghanaian
1133	KCCR/KSH-360	F	27			ASHANTI	Asymptomatic	negative	999	Ghanaian
1134	KCCR/KSH-361	M	24			ASHANTI	History of fever, cough	negative	999	Ghanaian
1135	KCCR/KSH-362	M	29			ASHANTI	Asymptomatic	negative	999	Ghanaian
1136	KCCR/KSH-363	M	73			ASHANTI	Cough, runny nose, nausea, headache, muscular pain	negative	999	Ghanaian
1137	KCCR/KSH-364	M	57			ASHANTI	Asymptomatic	negative	999	Ghanaian
1138	KCCR/KSH-365	F	60			ASHANTI	Asymptomatic	negative	999	Ghanaian
1139	KCCR/KSH-366	F	27			ASHANTI	Cough	negative	999	Ghanaian
1140	KCCR/KSH-367	M	62			ASHANTI	Asymptomatic	negative	999	Ghanaian
1141	KCCR/KSH-368	M	46			ASHANTI	Asymptomatic	negative	999	Ghanaian
1142	KCCR/KSH-369	M	34			ASHANTI	Asymptomatic	negative	999	Ghanaian
1143	KCCR/KSH-370	F	68			ASHANTI	Asymptomatic	negative	999	Ghanaian
1144	KCCR/KSH-371	M	20			ASHANTI	Asymptomatic	negative	999	Ghanaian
1145	KCCR/KSH-372	M	33			ASHANTI	Asymptomatic	negative	999	Ghanaian
1146	KCCR/KSH-373	M	41			ASHANTI	Asymptomatic	negative	999	Ghanaian
1147	KCCR/KSH-374	M	60			ASHANTI	Asymptomatic	negative	999	Ghanaian
1148	KCCR/KSH-375	F	32			ASHANTI	Asymptomatic	negative	999	Ghanaian
1149	KCCR/KSH-376	M	28			ASHANTI	Asymptomatic	negative	999	Ghanaian
1150	KCCR/KSH-377	M	31			ASHANTI	Asymptomatic	negative	999	Ghanaian
1151	KCCR/KSH-378	F	29			ASHANTI	Asymptomatic	negative	999	Ghanaian
1152	KCCR/KSH-379	F	58			ASHANTI	Asymptomatic	negative	999	Ghanaian
1153	KCCR/KSH-380	F	21			ASHANTI	Headache	negative	999	Ghanaian
1154	KCCR/KSH-381	M	12			ASHANTI	Asymptomatic	negative	999	Ghanaian
1155	KCCR/KSH-382	M	30			ASHANTI	History of fever, general weakness, sore throat, diarrhoea, headache	negative	999	Ghanaian
1156	KCCR/KSH-383	F	26			ASHANTI	Asymptomatic	negative	999	Ghanaian
1157	KCCR/KSH-384	M	70			ASHANTI	Asymptomatic	negative	999	Ghanaian
1158	KCCR/KSH-385	M	12			ASHANTI	Asymptomatic	negative	999	Ghanaian
1159	KCCR/KSH-386	F	28			ASHANTI	Asymptomatic	negative	999	Ghanaian
1160	KCCR/KSH-387	M	36			ASHANTI	Asymptomatic	negative	999	Ghanaian
1161	KCCR/KSH-388	M	18			ASHANTI	Asymptomatic	negative	999	Ghanaian
1162	KCCR/KSH-389	M	29			ASHANTI	Asymptomatic	negative	999	Ghanaian
1163	KCCR/KSH-390	M	34			ASHANTI	Asymptomatic	negative	999	Ghanaian
1164	KCCR/KSH-391	M	52			ASHANTI	Asymptomatic	negative	999	Ghanaian
1165	KCCR/KSH-392	M	34			ASHANTI	Asymptomatic	negative	999	Ghanaian
1166	KCCR/KSH-393	M	21			ASHANTI	Asymptomatic	negative	999	Ghanaian
1167	KCCR/KSH-394	M	12			ASHANTI	Asymptomatic	negative	999	Ghanaian
1168	KCCR/KSH-395	F	18			ASHANTI	Asymptomatic	negative	999	Ghanaian
1169	KCCR/KSH-396	M	36			ASHANTI	Asymptomatic	negative	999	Ghanaian
1170	KCCR/KSH-397	M	22			ASHANTI	Asymptomatic	negative	999	Ghanaian
1171	KCCR/KSH-398	F	65			ASHANTI	Asymptomatic	POSITIVE	999	Ghanaian
1172	KCCR/KSH-399	F	49			ASHANTI	History of fever	negative	999	Ghanaian
1173	KCCR/KSH-400	M	47			ASHANTI	Asymptomatic	negative	999	Ghanaian
1174	KCCR/KSH-401	M	44			ASHANTI	Asymptomatic	negative	999	Ghanaian
1175	KCCR/KSH-402	F	34			ASHANTI	Asymptomatic	negative	999	Ghanaian
1176	KCCR/KSH-403	F	33			ASHANTI	Asymptomatic	negative	999	Ghanaian
1177	KCCR/KSH-404	M	36			ASHANTI	Asymptomatic	negative	999	Ghanaian
1178	KCCR/KSH-405	M	32			ASHANTI	Asymptomatic	negative	999	Ghanaian
1179	KCCR/KSH-406	F	28			ASHANTI	Asymptomatic	negative	999	Ghanaian
1180	KCCR/KSH-407	M	31			ASHANTI	Asymptomatic	negative	999	Ghanaian
1181	KCCR/KSH-408	M	53			ASHANTI	Asymptomatic	negative	999	Ghanaian
1182	KCCR/KSH-409	M	36			ASHANTI	Asymptomatic	negative	999	Ghanaian
1183	KCCR/KSH-410	M	26			ASHANTI	Asymptomatic	negative	999	Ghanaian
1184	KCCR/KSH-411	M	31			ASHANTI	Asymptomatic	negative	999	Ghanaian
1185	KCCR/KSH-412	M	33			ASHANTI	Asymptomatic	negative	999	Ghanaian
1186	KCCR/KSH-413	F	25			ASHANTI	Asymptomatic	negative	999	Ghanaian
1187	KCCR/KSH-414	F	27			ASHANTI	Asymptomatic	negative	999	Ghanaian
1188	KCCR/KSH-415	F	-999			ASHANTI	Asymptomatic	negative	999	Ghanaian
1189	KCCR/KSH-416	F	25			ASHANTI	Asymptomatic	negative	999	Ghanaian
1190	KCCR/KSH-417	F	24			ASHANTI	Asymptomatic	negative	999	Ghanaian
1191	KCCR/KSH-418	M	33			ASHANTI	Asymptomatic	negative	999	Ghanaian
1192	KCCR/KSH-419	M	41			ASHANTI	Asymptomatic	negative	999	Ghanaian
1193	KCCR/KSH-420	F	27			ASHANTI	Asymptomatic	negative	999	Ghanaian
1194	KCCR/KSH-421	F	29			ASHANTI	Asymptomatic	negative	999	Ghanaian
1195	KCCR/KSH-422	M	32			ASHANTI	Asymptomatic	negative	999	Ghanaian
1196	KCCR/KSH-423	M	46			ASHANTI	Asymptomatic	negative	999	Ghanaian
1197	KCCR/KSH-424	M	-999			ASHANTI	Asymptomatic	negative	999	Ghanaian
1198	KCCR/KSH-425	F	25			ASHANTI	Asymptomatic	negative	999	Ghanaian
1199	KCCR/MDH-003	F	21			ASHANTI	Asymptomatic	negative	999	Ghanaian
1200	KCCR/MDH-004	F	25			ASHANTI	Asymptomatic	negative	999	Ghanaian
1201	KCCR/MDH-005	F	29			ASHANTI	Asymptomatic	negative	999	Ghanaian
1202	KCCR/MDH-006	F	41			ASHANTI	Asymptomatic	negative	999	Ghanaian
1203	KCCR/MDH-007	F	40			ASHANTI	Asymptomatic	negative	999	Ghanaian
1204	KCCR/MDH-008	M	51			ASHANTI	Asymptomatic	negative	999	Ghanaian
1205	KCCR/MDH-009	F	24			ASHANTI	Asymptomatic	negative	999	Ghanaian
1206	KCCR/MDH-010	F	25			ASHANTI	Asymptomatic	negative	999	Ghanaian
1207	KCCR/MDH-011	F	57			ASHANTI	Asymptomatic	negative	999	Ghanaian
1208	KCCR/MDH-012	M	34			ASHANTI	Asymptomatic	negative	999	Ghanaian
1209	KCCR/MDH-013	F	22			ASHANTI	Asymptomatic	negative	999	Ghanaian
1210	KCCR/MDH-014	F	32			ASHANTI	Asymptomatic	negative	999	Ghanaian
1211	KCCR/MDH-015	M	26			ASHANTI	Asymptomatic	negative	999	Ghanaian
1212	KCCR/MDH-016	M	45			ASHANTI	Asymptomatic	negative	999	Ghanaian
1213	KCCR/MDH-017	M	54			ASHANTI	Asymptomatic	negative	999	Ghanaian
1214	KCCR/MDH-018	M	53			ASHANTI	Asymptomatic	negative	999	Ghanaian
1215	KCCR/MDH-019	F	30			ASHANTI	Asymptomatic	negative	999	Ghanaian
1216	KCCR/MDH-020	F	24			ASHANTI	Asymptomatic	negative	999	Ghanaian
1217	KCCR/MDH-021	F	42			ASHANTI	Asymptomatic	negative	999	Ghanaian
1218	KCCR/MDH-022	F	30			ASHANTI	Asymptomatic	negative	999	Ghanaian
1219	KCCR/MDH-023	F	35			ASHANTI	Asymptomatic	negative	999	Ghanaian
1220	KCCR/MDH-024	F	41			ASHANTI	Asymptomatic	negative	999	Ghanaian
1221	KCCR/MDH-025	F	34			ASHANTI	Asymptomatic	negative	999	Ghanaian
1222	KCCR/MDH-026	F	29			ASHANTI	Asymptomatic	negative	999	Ghanaian
1223	KCCR/MDH-027	F	27			ASHANTI	Asymptomatic	negative	999	Ghanaian
1224	KCCR/MDH-028	F	19			ASHANTI	Asymptomatic	negative	999	Ghanaian
1225	KCCR/MDH-029	M	34			ASHANTI	Asymptomatic	negative	999	Ghanaian
1226	KCCR/MDH-030	F	48			ASHANTI	Asymptomatic	negative	999	Ghanaian
1227	KCCR/MDH-031	F	43			ASHANTI	Asymptomatic	negative	999	Ghanaian
1228	KCCR/MDH-032	F	27			ASHANTI	Asymptomatic	negative	999	Ghanaian
1229	KCCR/MDH-033	F	25			ASHANTI	Asymptomatic	negative	999	Ghanaian
1230	KCCR/MDH-034	M	36			ASHANTI	Asymptomatic	negative	999	Ghanaian
1231	KCCR/MDH-035	F	30			ASHANTI	Asymptomatic	negative	999	Ghanaian
1232	KCCR/MDH-036	M	12			ASHANTI	Asymptomatic	negative	999	Ghanaian
1233	KCCR/MDH-037	F	37			ASHANTI	Asymptomatic	negative	999	Ghanaian
1234	KCCR/MDH-038	M	43			ASHANTI	Asymptomatic	negative	999	Ghanaian
1235	KCCR/MDH-039	F	58			ASHANTI	Asymptomatic	negative	999	Ghanaian
1236	KCCR/MDH-040	M	31			ASHANTI	Asymptomatic	negative	999	Ghanaian
1237	KCCR/MDH-041	F	-999			ASHANTI	Asymptomatic	negative	999	Ghanaian
1238	KCCR/MDH-042	F	25			ASHANTI	Asymptomatic	negative	999	Ghanaian
1239	KCCR/MDH-043	M	45			ASHANTI	Asymptomatic	negative	999	Ghanaian
1240	KCCR/MDH-044	M	38			ASHANTI	Asymptomatic	negative	999	Ghanaian
1241	KCCR/MDH-045	M	43			ASHANTI	Asymptomatic	negative	999	Ghanaian
1242	KCCR/MDH-046	M	55			ASHANTI	Asymptomatic	negative	999	Ghanaian
1243	KCCR/MDH-047	F	48			ASHANTI	Asymptomatic	negative	999	Ghanaian
1244	KCCR/MDH-048	F	64			ASHANTI	Asymptomatic	negative	999	Ghanaian
1245	KCCR/MDH-049	M	37			ASHANTI	Asymptomatic	negative	999	Ghanaian
1246	KCCR/MDH-050	F	31			ASHANTI	Asymptomatic	negative	999	Ghanaian
1247	KCCR/MDH-051	F	32			ASHANTI	Asymptomatic	negative	999	Ghanaian
1248	KCCR/MDH-052	M	30			ASHANTI	Asymptomatic	negative	999	Ghanaian
1249	KCCR/MDH-053	F	31			ASHANTI	Asymptomatic	negative	999	Ghanaian
1250	KCCR/MDH-054	F	50			ASHANTI	Asymptomatic	negative	999	Ghanaian
1251	KCCR/MDH-055	F	36			ASHANTI	Asymptomatic	negative	999	Ghanaian
1252	KCCR/MDH-056	M	48			ASHANTI	Asymptomatic	negative	999	Ghanaian
1253	KCCR/MDH-057	F	21			ASHANTI	Asymptomatic	negative	999	Ghanaian
1254	KCCR/MDH-058	F	25			ASHANTI	Asymptomatic	negative	999	Ghanaian
1255	KCCR/MDH-059	M	70			ASHANTI	Asymptomatic	negative	999	Ghanaian
1256	KCCR/MDH-060	M	43			ASHANTI	Asymptomatic	negative	999	Ghanaian
1257	KCCR/MDH-061	F	83			ASHANTI	Asymptomatic	negative	999	Ghanaian
1258	KCCR/MDH-062	M	34			ASHANTI	Asymptomatic	negative	999	Ghanaian
1259	KCCR/MDH-063	M	40			ASHANTI	Asymptomatic	negative	999	Ghanaian
1260	KCCR/MDH-064	F	33			ASHANTI	Asymptomatic	negative	999	Ghanaian
1261	KCCR/MDH-065	F	36			ASHANTI	Asymptomatic	negative	999	Ghanaian
1262	KCCR/MDH-066	F	30			ASHANTI	Asymptomatic	negative	999	Ghanaian
1263	KCCR/MDH-067	M	43			ASHANTI	Asymptomatic	negative	999	Ghanaian
1264	KCCR/MDH-068	F	63			ASHANTI	Asymptomatic	negative	999	Ghanaian
1265	KCCR/MDH-069	F	25			ASHANTI	Asymptomatic	negative	999	Ghanaian
1266	KCCR/MDH-070	F	18			ASHANTI	Asymptomatic	negative	999	Ghanaian
1267	KCCR/MDH-071	F	18			ASHANTI	Asymptomatic	negative	999	Ghanaian
1268	KCCR/KATH-120	F	28			ASHANTI	Cough, Shortness of breath	negative	999	Ghanaian
1269	KCCR/KATH-121	M	35			ASHANTI	cough, runny nose, shortness of breath	negative	999	Ghanaian
1270	KCCR/KATH-122	M	27			ASHANTI	History of fever, cough, headache, chest pains	negative	999	Ghanaian
44863	KCCR/SGH-2566	M	21			ASHANTI	Asymptomatic	negative	999	Ghanaian
1272	KCCR/BE-009	M	30			BONO EAST	General weakness, cough, shortness of breath, diarrhoea, muscular pain	negative	999	Ghanaian
1273	KCCR/EJM-001	M	32			ASHANTI	Sore throat, runny nose, sneezing	negative	999	Ghanaian
1274	KCCR/BR-012	M	30			BONO	History of fever, general weakness, cough, sore throat, headache, joint pain	negative	999	Ghanaian
1275	KCCR/BR-013	M	33			BONO	History of fever, cough, sore throat, shortness of breath, headache	negative	999	Ghanaian
1276	KCCR/BR-014	M	39			BONO	Asymptomatic	negative	999	Ghanaian
1277	KCCR/AGO-080	M	27			ASHANTI	Asymptomatic	negative	999	Ghanaian
1278	KCCR/AGO-081	M	34			ASHANTI	Asymptomatic	negative	999	Ghanaian
1279	KCCR/AGO-082	M	53			ASHANTI	Asymptomatic	negative	999	Ghanaian
1280	KCCR/AGO-083	M	58			ASHANTI	Asymptomatic	negative	999	Foreigner
1281	KCCR/AGO-084	M	47			ASHANTI	Asymptomatic	negative	999	Foreigner
1282	KCCR/AGO-085	M	52			ASHANTI	Asymptomatic	negative	999	Foreigner
1283	KCCR/AGO-086	M	57			ASHANTI	General weakness, cough,	negative	999	Foreigner
1284	KCCR/AGO-087	M	26			ASHANTI	Headache	negative	999	Ghanaian
1285	KCCR/KNUSTH-033	M	57			ASHANTI	Cough	negative	999	Ghanaian
1286	KCCR/KNUSTH-034	F	-999			ASHANTI	Cough, sore throat	negative	999	Ghanaian
1287	KCCR/ASK-001	M	45			ASHANTI	Cough	negative	999	Ghanaian
1288	KCCR/ASK-002	M	28			ASHANTI	Cough	negative	999	Ghanaian
1289	KCCR/ASK-003	M	26			ASHANTI	Asymptomatic	negative	999	Ghanaian
1290	KCCR/ASK-004	F	38			ASHANTI	Asymptomatic	negative	999	Ghanaian
1291	KCCR/ASK-005	F	35			ASHANTI	Asymptomatic	negative	999	Ghanaian
1292	KCCR/ASK-006	F	64			ASHANTI	Cough	negative	999	Ghanaian
1293	KCCR/ASK-007	M	6			ASHANTI	Cough, sore throat	negative	999	Ghanaian
1294	KCCR/ASK-008	F	36			ASHANTI	History of fever, general weakness, cough, diarrhoea, headache, nausea	negative	999	Ghanaian
1295	KCCR/ASK-009	F	33			ASHANTI	Cough, headache, muscular pain	negative	999	Ghanaian
1296	KCCR/ASK-010	M	34			ASHANTI	History of fever, nausea, headache	negative	999	Ghanaian
1297	KCCR/ASK-011	F	34			ASHANTI	Asymptomatic	negative	999	Ghanaian
1298	KCCR/ASK-012	M	75			ASHANTI	Asymptomatic	negative	999	Ghanaian
1299	KCCR/ASK-013	M	43			ASHANTI	Asymptomatic	negative	999	Ghanaian
1300	KCCR/ASK-014	F	23			ASHANTI	Asymptomatic	negative	999	Ghanaian
1301	KCCR/ASK-015	F	28			ASHANTI	Asymptomatic	negative	999	Ghanaian
1302	KCCR/ASK-016	F	12			ASHANTI	Asymptomatic	negative	999	Ghanaian
1303	KCCR/ASK-017	M	17			ASHANTI	Asymptomatic	negative	999	Ghanaian
1304	KCCR/ASK-018	F	66			ASHANTI	Asymptomatic	negative	999	Ghanaian
1305	KCCR/ASK-019	F	33			ASHANTI	Asymptomatic	negative	999	Ghanaian
1306	KCCR/ASK-020	M	37			ASHANTI	Asymptomatic	negative	999	Ghanaian
1307	KCCR/ASK-021	M	29			ASHANTI	Asymptomatic	negative	999	Ghanaian
1308	KCCR/ASK-022	F	23			ASHANTI	Asymptomatic	negative	999	Ghanaian
1309	KCCR/ASK-023	F	45			ASHANTI	Asymptomatic	negative	999	Ghanaian
1310	KCCR/ASK-024	F	21			ASHANTI	Asymptomatic	negative	999	Ghanaian
1311	KCCR/ASK-025	M	21			ASHANTI	Asymptomatic	negative	999	Ghanaian
1312	KCCR/ASK-026	F	49			ASHANTI	Asymptomatic	negative	999	Ghanaian
1313	KCCR/ASK-027	F	28			ASHANTI	Asymptomatic	negative	999	Ghanaian
1314	KCCR/ASK-028	M	45			ASHANTI	Asymptomatic	negative	999	Ghanaian
1315	KCCR/ASK-029	F	32			ASHANTI	Asymptomatic	negative	999	Ghanaian
1316	KCCR/ASK-030	M	30			ASHANTI	Asymptomatic	negative	999	Ghanaian
1317	KCCR/ASK-031	F	46			ASHANTI	Asymptomatic	negative	999	Ghanaian
1318	KCCR/ASK-032	M	46			ASHANTI	Asymptomatic	negative	999	Ghanaian
1319	KCCR/ASK-033	F	40			ASHANTI	Asymptomatic	negative	999	Ghanaian
1320	KCCR/ASK-034	F	63			ASHANTI	Asymptomatic	negative	999	Ghanaian
1321	KCCR/ASK-035	F	50			ASHANTI	Asymptomatic	negative	999	Ghanaian
1322	KCCR/ASK-036	F	30			ASHANTI	Asymptomatic	negative	999	Ghanaian
1323	KCCR/ASK-037	M	19			ASHANTI	Asymptomatic	negative	999	Ghanaian
1324	KCCR/ASK-038	F	36			ASHANTI	Asymptomatic	negative	999	Ghanaian
1325	KCCR/ASK-039	M	15			ASHANTI	Asymptomatic	negative	999	Ghanaian
1326	KCCR/ASK-040	F	21			ASHANTI	Asymptomatic	negative	999	Ghanaian
1327	KCCR/ASK-041	F	65			ASHANTI	Asymptomatic	negative	999	Ghanaian
1328	KCCR/ASK-042	M	73			ASHANTI	Asymptomatic	negative	999	Ghanaian
1329	KCCR/ASK-043	M	17			ASHANTI	Asymptomatic	negative	999	Ghanaian
1330	KCCR/ASK-044	M	49			ASHANTI	Asymptomatic	negative	999	Ghanaian
1331	KCCR/ASK-045	F	26			ASHANTI	Asymptomatic	negative	999	Ghanaian
1332	KCCR/ASK-046	F	35			ASHANTI	Asymptomatic	negative	999	Ghanaian
1333	KCCR/ASK-047	F	13			ASHANTI	Asymptomatic	negative	999	Ghanaian
1334	KCCR/ASK-048	M	40			ASHANTI	Asymptomatic	negative	999	Ghanaian
1335	KCCR/ASK-049	F	29			ASHANTI	Headache	negative	999	Ghanaian
1336	KCCR/ASK-050	M	42			ASHANTI	Asymptomatic	negative	999	Ghanaian
1337	KCCR/ASK-051	F	48			ASHANTI	Asymptomatic	negative	999	Ghanaian
1338	KCCR/ASK-052	F	55			ASHANTI	Asymptomatic	negative	999	Ghanaian
1339	KCCR/ASK-053	F	72			ASHANTI	Asymptomatic	negative	999	Ghanaian
1340	KCCR/ASK-054	F	32			ASHANTI	Asymptomatic	negative	999	Ghanaian
1341	KCCR/ASK-055	M	84			ASHANTI	Asymptomatic	negative	999	Ghanaian
1342	KCCR/ASK-056	F	28			ASHANTI	Asymptomatic	negative	999	Ghanaian
1343	KCCR/ASK-057	M	30			ASHANTI	Asymptomatic	negative	999	Ghanaian
1344	KCCR/ASK-058	F	34			ASHANTI	Asymptomatic	negative	999	Ghanaian
1345	KCCR/ASK-059	F	64			ASHANTI	Asymptomatic	negative	999	Ghanaian
1346	KCCR/ASK-060	F	35			ASHANTI	Asymptomatic	negative	999	Ghanaian
1347	KCCR/ASK-061	F	40			ASHANTI	Asymptomatic	negative	999	Ghanaian
1348	KCCR/ASK-062	F	13			ASHANTI	Asymptomatic	negative	999	Ghanaian
1349	KCCR/ASK-063	M	47			ASHANTI	Asymptomatic	negative	999	Ghanaian
1350	KCCR/ASK-064	F	15			ASHANTI	Asymptomatic	negative	999	Ghanaian
1351	KCCR/ASK-065	F	11			ASHANTI	Asymptomatic	negative	999	Ghanaian
1352	KCCR/ASK-066	M	39			ASHANTI	Asymptomatic	negative	999	Ghanaian
1353	KCCR/ASK-067	F	51			ASHANTI	Asymptomatic	negative	999	Ghanaian
1354	KCCR/ASK-068	F	64			ASHANTI	Asymptomatic	negative	999	Ghanaian
1355	KCCR/ASK-069	F	98			ASHANTI	Asymptomatic	negative	999	Ghanaian
1356	KCCR/ASK-070	M	25			ASHANTI	Asymptomatic	negative	999	Ghanaian
1357	KCCR/ASK-071	M	25			ASHANTI	Asymptomatic	negative	999	Ghanaian
1358	KCCR/ASK-072	M	16			ASHANTI	Asymptomatic	negative	999	Ghanaian
1359	KCCR/ASK-073	F	39			ASHANTI	Asymptomatic	negative	999	Ghanaian
1360	KCCR/ASK-074	F	14			ASHANTI	Asymptomatic	negative	999	Ghanaian
1361	KCCR/ASK-075	F	63			ASHANTI	Asymptomatic	negative	999	Ghanaian
1362	KCCR/ASK-076	M	19			ASHANTI	Asymptomatic	negative	999	Ghanaian
1363	KCCR/ASK-077	M	10			ASHANTI	Asymptomatic	negative	999	Ghanaian
1364	KCCR/ASK-078	F	35			ASHANTI	Asymptomatic	negative	999	Ghanaian
1365	KCCR/ASK-079	M	17			ASHANTI	Asymptomatic	negative	999	Ghanaian
1366	KCCR/ASK-080	M	17			ASHANTI	Asymptomatic	negative	999	Ghanaian
1367	KCCR/ASK-081	F	15			ASHANTI	Asymptomatic	negative	999	Ghanaian
1368	KCCR/KNUSTH-035	M	-999			ASHANTI	History of fever, general weakness	POSITIVE	999	Ghanaian
1369	KCCR/KSI-071	M	33			ASHANTI	no symptoms	negative	999	Ghanaian
1370	KCCR/KSI-072	M	45			ASHANTI	no symptoms	negative	999	Ghanaian
1371	KCCR/KSI-073	M	68			ASHANTI	Asymptomatic	negative	999	Ghanaian
1372	KCCR/KSI-074	M	37			ASHANTI	Asymptomatic	negative	999	Ghanaian
1373	KCCR/KSI-075	F	30			ASHANTI	Asymptomatic	negative	999	Ghanaian
1374	KCCR/KSI-076	F	38			ASHANTI	Asymptomatic	negative	999	Ghanaian
1375	KCCR/KSI-077	M	21			ASHANTI	General weakness/ Sore throat	negative	999	Ghanaian
1376	KCCR/KSI-078	M	51			ASHANTI	Asymptomatic	negative	999	Ghanaian
1377	KCCR/KSI-079	M	31			ASHANTI	Asymptomatic	negative	999	Ghanaian
1378	KCCR/KSI-080	M	-999	999	999	ASHANTI	Cough / Shortness of breath	negative	999	Ghanaian
1379	KCCR/KSI-081	M	65			ASHANTI	Cough	negative	999	Ghanaian
1380	KCCR/KSI-082	F	51			ASHANTI	Asymptomatic	negative	999	Foreigner
1381	KCCR/KSI-083	F	24			ASHANTI	Asymptomatic	negative	999	Ghanaian
1382	KCCR/KSI-084	M	23			ASHANTI	Pain-Muscular	negative	999	Ghanaian
1383	KCCR/KSI-085	M	4			ASHANTI	Cough/ Headache	negative	999	Ghanaian
1384	KCCR/KSI-086	M	35			ASHANTI	Asymptomatic	negative	999	Ghanaian
1385	KCCR/KSI-087	M	43			ASHANTI	Asymptomatic	negative	999	Ghanaian
1386	KCCR/KSI-088	F	64			ASHANTI	Asymptomatic	negative	999	Ghanaian
1387	KCCR/KSI-089	M	84			ASHANTI	General weakness/ Sore throat	negative	999	Ghanaian
1388	KCCR/KSI-090	F	25			ASHANTI	Cough/ Sore throat	negative	999	Ghanaian
1389	KCCR/KSI-091	M	-999	999	999	ASHANTI	History of fever/ Sore throat	negative	999	Ghanaian
1390	KCCR/KSI-092	F	57			ASHANTI	Pain-Muscular	negative	999	Ghanaian
1391	KCCR/KSI-093	M	29			ASHANTI	History of fever/ General weakness/ Cough/ Sore throat/ Shortness of breath/ Diarrhoea/ Nausea/ Headache	negative	999	Ghanaian
1392	KCCR/KSI-094	M	63			ASHANTI	Asymptomatic	negative	999	Ghanaian
1393	KCCR/KSI-095	M	61			ASHANTI	Asymptomatic	negative	999	Ghanaian
1394	KCCR/KSI-096	F	35			ASHANTI	Asymptomatic	negative	999	Ghanaian
1395	KCCR/KSI-097	F	30			ASHANTI	Asymptomatic	negative	999	Ghanaian
1396	KCCR/KSI-098	F	30			ASHANTI	Asymptomatic	negative	999	Ghanaian
1397	KCCR/KSI-099	M	45			ASHANTI	Asymptomatic	negative	999	Ghanaian
1398	KCCR/KSI-100	F	36			ASHANTI	Asymptomatic	negative	999	Ghanaian
1399	KCCR/KSI-101	F	45			ASHANTI	Asymptomatic	negative	999	Ghanaian
1400	KCCR/KSI-102	M	39			ASHANTI	Asymptomatic	negative	999	Ghanaian
1401	KCCR/KSI-103	F	38			ASHANTI	Asymptomatic	negative	999	Ghanaian
1402	KCCR/KSI-104	M	33			ASHANTI	Asymptomatic	negative	999	Ghanaian
1403	KCCR/KSI-105	M	50			ASHANTI	Asymptomatic	negative	999	Ghanaian
1404	KCCR/KSI-106	M	24			ASHANTI	Asymptomatic	negative	999	Ghanaian
1405	KCCR/KSI-107	F	35			ASHANTI	General weakness/ Headache	negative	999	Ghanaian
1406	KCCR/KSI-108	F	23			ASHANTI	Asymptomatic	negative	999	Ghanaian
1407	KCCR/KSI-109	F	26			ASHANTI	Asymptomatic	negative	999	Ghanaian
1408	KCCR/KSI-110	F	34			ASHANTI	Cough Runny Nose	negative	999	Ghanaian
1409	KCCR/KSI-111	F	48			ASHANTI	Asymptomatic	negative	999	Ghanaian
1410	KCCR/KSI-112	F	20			ASHANTI	General weakness/ Headache	negative	999	Ghanaian
1411	KCCR/KSI-113	F	46			ASHANTI	General weakness/ Headache	negative	999	Ghanaian
1412	KCCR/KSI-114	F	34			ASHANTI	Asymptomatic	negative	999	Ghanaian
1413	KCCR/KSI-115	M	35			ASHANTI	Headache	negative	999	Ghanaian
1414	KCCR/KSI-116	F	29			ASHANTI	Asymptomatic	negative	999	Ghanaian
1415	KCCR/KSI-117	M	49			ASHANTI	General weakness/ Headache	negative	999	Ghanaian
29958	KCCR/SGH-1975	F	24			ASHANTI	Asymptomatic	negative	999	Ghanaian
72250	KCCR/SGH-3875	F	80			ASHANTI	Runny nose, headache	POSITIVE	19.01	Ghanaian
5749	KCCR/SGH-505	M	42			ASHANTI	Asymptomatic	negative	999	Ghanaian
17167	KCCR/SGH-1364	M	28			ASHANTI	Asymptomatic	negative	999	Ghanaian
27312	KCCR/SGH-1537A	M	24			ASHANTI	Asymptomatic	negative	999	Ghanaian
59786	KCCR/SGH-2970	M	28			ASHANTI	Asymptomatic	negative	999	Ghanaian
52438	KCCR/SGH-2757	M	45			ASHANTI	Asymptomatic	negative	999	Ghanaian
23910	KCCR/SGH-1711	M	22			ASHANTI	Asymptomatic	negative	999	Ghanaian
30009	KCCR/SGH-2026	M	59			ASHANTI	Asymptomatic	negative	999	Ghanaian
42080	KCCR/SGH-2528	M	30			ASHANTI	Asymptomatic	negative	999	Ghanaian
19163	KCCR/KSH-664	M	32			ASHANTI	Asymptomatic	negative	999	Ghanaian
48953	KCCR/SGH-2699	F	18			ASHANTI	History of fever,shortness of breath,headache	negative	999	Ghanaian
29941	KCCR/SGH-1958	M	45			ASHANTI	Asymptomatic	negative	999	Ghanaian
15717	KCCR/SGH-1162	F	23			ASHANTI	Asymptomatic	negative	999	Ghanaian
15796	KCCR/SGH-1241	M	21			ASHANTI	Asymptomatic	negative	999	Ghanaian
12113	KCCR/SGH-1117	M	21			ASHANTI	Asymptomatic	negative	999	Ghanaian
15702	KCCR/SGH-1147	M	23			ASHANTI	Asymptomatic	negative	999	Ghanaian
50310	KCCR/SGH-2740	F	50			ASHANTI	Headache	negative	999	Ghanaian
61469	KCCR/SGH-3196	F	40			ASHANTI	Asymptomatic	negative	999	Ghanaian
27356	KCCR/SGH-1581A	F	30			ASHANTI	Asymptomatic	negative	999	Ghanaian
32408	KCCR/SGH-2217	F	43			ASHANTI	Asymptomatic	negative	999	Ghanaian
3388	KCCR/SGH-357	F	72			ASHANTI	cough	negative	999	Ghanaian
65109	KCCR/SGH-3462	F	41			ASHANTI	Asymptomatic	negative	999	Ghanaian
74122	KCCR/SGH-3991	F	34			ASHANTI	Asymptomatic	negative	999	Ghanaian
1445	KCCR/ASS-034	M	44			ASHANTI	Asymptomatic	negative	999	Ghanaian
1446	KCCR/ASS-035	M	67			ASHANTI	Asymptomatic	negative	999	Ghanaian
1447	KCCR/ASS-036	F	50			ASHANTI	Asymptomatic	negative	999	Ghanaian
1448	KCCR/ASS-037	M	46			ASHANTI	Asymptomatic	negative	999	Ghanaian
1449	KCCR/ASS-038	M	63			ASHANTI	Asymptomatic	negative	999	Ghanaian
1450	KCCR/ASS-039	M	50			ASHANTI	Asymptomatic	negative	999	Ghanaian
1451	KCCR/ASS-040	M	56			ASHANTI	Asymptomatic	negative	999	Ghanaian
1452	KCCR/ASS-041	M	41			ASHANTI	Asymptomatic	negative	999	Ghanaian
1453	KCCR/ASS-042	F	46			ASHANTI	Asymptomatic	negative	999	Ghanaian
1454	KCCR/ASS-043	M	40			ASHANTI	Asymptomatic	negative	999	Ghanaian
1455	KCCR/ASS-044	F	34			ASHANTI	Asymptomatic	negative	999	Ghanaian
1456	KCCR/ASS-045	M	35			ASHANTI	Asymptomatic	negative	999	Ghanaian
1457	KCCR/ASS-046	M	51			ASHANTI	Asymptomatic	negative	999	Ghanaian
1458	KCCR/KWA-001	M	71			ASHANTI	Asymptomatic	negative	999	Ghanaian
1459	KCCR/KWA-002	M	49			ASHANTI	Asymptomatic	negative	999	Ghanaian
1460	KCCR/KWA-003	M	42			ASHANTI	Asymptomatic	negative	999	Ghanaian
1461	KCCR/KWA-004	F	27			ASHANTI	Asymptomatic	negative	999	Ghanaian
1462	KCCR/KWA-005	M	60			ASHANTI	Asymptomatic	negative	999	Ghanaian
1463	KCCR/KWA-006	M	42			ASHANTI	Asymptomatic	negative	999	Ghanaian
1464	KCCR/KWA-007	F	39			ASHANTI	Asymptomatic	negative	999	Ghanaian
1465	KCCR/KWA-008	M	37			ASHANTI	Asymptomatic	POSITIVE	999	Ghanaian
1466	KCCR/KWA-009	F	35			ASHANTI	Asymptomatic	negative	999	Ghanaian
1467	KCCR/KWA-010	M	43			ASHANTI	Asymptomatic	negative	999	Ghanaian
1468	KCCR/KWA-011	M	68			ASHANTI	Asymptomatic	negative	999	Ghanaian
1469	KCCR/KWA-012	F	49			ASHANTI	Asymptomatic	negative	999	Ghanaian
1470	KCCR/KWA-013	M	24			ASHANTI	Asymptomatic	negative	999	Ghanaian
1471	KCCR/OMA-004	M	27			ASHANTI	History of fever, sore throat, runny nose, headache	negative	999	Ghanaian
1472	KCCR/OMA-005	M	30			ASHANTI	Asymptomatic	negative	999	Ghanaian
1473	KCCR/BOS-019	M	33			ASHANTI	Asymptomatic	negative	999	Ghanaian
1474	KCCR/BOS-020	M	56			ASHANTI	History of fever/chills, General weakness, cough	negative	999	Ghanaian
1475	KCCR/BOS-021	F	60			ASHANTI	General weakness, cough, sore throat	negative	999	Ghanaian
1476	KCCR/BOS-022	F	47			ASHANTI	Cough	negative	999	Ghanaian
1477	KCCR/BOS-023	F	18			ASHANTI	Asymptomatic	negative	999	Ghanaian
1478	KCCR/BOS-204	F	12			ASHANTI	Cough, Stomach Ache	negative	999	Ghanaian
1479	KCCR/BOS-025	F	14			ASHANTI	Asymptomatic	negative	999	Ghanaian
1480	KCCR/BOS-026	M	35			ASHANTI	Asymptomatic	negative	999	Ghanaian
1481	KCCR/BOS-027	M	27			ASHANTI	Asymptomatic	negative	999	Ghanaian
1482	KCCR/BOS-028	F	30			ASHANTI	Cough	negative	999	Ghanaian
1483	KCCR/BOS-029	F	24			ASHANTI	Cough	negative	999	Ghanaian
1484	KCCR/BOS-030	M	37			ASHANTI	Cough	POSITIVE	999	Ghanaian
1485	KCCR/BOS-031	M	24			ASHANTI	Cough	negative	999	Ghanaian
1486	KCCR/BOS-033	F	24			ASHANTI	Cough	negative	999	Ghanaian
1487	KCCR/BOS-034	M	38			ASHANTI	Cough	negative	999	Ghanaian
1488	KCCR/BOS-035	M	80			ASHANTI	Cough, Headache	negative	999	Ghanaian
1489	KCCR/BOS-036	F	35			ASHANTI	Sneezing	negative	999	Ghanaian
1490	KCCR/BOS-037	F	37			ASHANTI	Asymptomatic	negative	999	Ghanaian
1491	KCCR/BOS-038	M	38			ASHANTI	Asymptomatic	negative	999	Ghanaian
1492	KCCR/WES-004	M	38			WESTERN	Asymptomatic	negative	999	Ghanaian
1493	KCCR/WES-005	F	27			WESTERN	Asymptomatic	negative	999	Ghanaian
1494	KCCR/AMS-001	M	26			ASHANTI	Asymptomatic	negative	999	Ghanaian
1495	KCCR/EJM-002	M	57			ASHANTI	Cough, Shortness of Breath	negative	999	Ghanaian
1496	KCCR/EJM-003	F	56			ASHANTI	Joint pain	negative	999	Ghanaian
1497	KCCR/EJM-004	M	-999			ASHANTI	General weakness, cough, joint pain	negative	999	Ghanaian
1498	KCCR/EJM-005	M	38			ASHANTI	Asymptomatic	negative	999	Ghanaian
1499	KCCR/EJM-006	F	-999			ASHANTI	Asymptomatic	negative	999	Ghanaian
1500	KCCR/KATH-123	M	31			ASHANTI	Shortness of breath, Chest pain	negative	999	Ghanaian
1501	KCCR/KATH-124	M	64			ASHANTI	General weakness, shortness of breath, Diarrhoea, chest and abdominal pain	negative	999	Ghanaian
1502	KCCR/KATH-125	F	26			ASHANTI	Genaral weakness, cough, shortness of breath, Diarrhoea	negative	999	Ghanaian
1503	KCCR/KATH-126	M	52			ASHANTI	History of fever/chills,sore throat, shortness of breath	negative	999	Ghanaian
1504	KCCR/KATH-127	F	28			ASHANTI	History of fever/chills, cough	negative	999	Ghanaian
1505	KCCR/SME-001	M	39			ASHANTI	Asymptomatic	negative	999	Ghanaian
1506	KCCR/SME-002	M	34			ASHANTI	Asymptomatic	negative	999	Ghanaian
1507	KCCR/SME-003	M	67			ASHANTI	Asymptomatic	negative	999	Ghanaian
1508	KCCR/SME-004	M	57			ASHANTI	Asymptomatic	negative	999	Ghanaian
1509	KCCR/SME-005	M	35			ASHANTI	Asymptomatic	negative	999	Ghanaian
1510	KCCR/SME-006	M	26			ASHANTI	Asymptomatic	negative	999	Ghanaian
1511	KCCR/OHD-053	M	67			ASHANTI	Asymptomatic	negative	999	Ghanaian
1512	KCCR/OHD-054	F	64			ASHANTI	Asymptomatic	negative	999	Ghanaian
1513	KCCR/OHD-055	F	35			ASHANTI	Asymptomatic	negative	999	Ghanaian
1514	KCCR/OHD-056	F	44			ASHANTI	Asymptomatic	negative	999	Ghanaian
1515	KCCR/OHD-057	F	46			ASHANTI	Asymptomatic	negative	999	Ghanaian
1516	KCCR/OHD-058	F	23			ASHANTI	Asymptomatic	negative	999	Ghanaian
1517	KCCR/OHD-059	M	38			ASHANTI	Asymptomatic	negative	999	Ghanaian
1518	KCCR/OHD-060	F	35			ASHANTI	Asymptomatic	negative	999	Ghanaian
1519	KCCR/OHD-061	F	28			ASHANTI	Asymptomatic	negative	999	Ghanaian
1520	KCCR/OHD-062	M	34			ASHANTI	Asymptomatic	negative	999	Ghanaian
1521	KCCR/OHD-063	F	33			ASHANTI	Asymptomatic	negative	999	Ghanaian
1522	KCCR/OHD-064	M	31			ASHANTI	Asymptomatic	negative	999	Ghanaian
1523	KCCR/OHD-065	F	34			ASHANTI	Asymptomatic	negative	999	Ghanaian
1524	KCCR/OHD-066	F	30			ASHANTI	Asymptomatic	negative	999	Ghanaian
1525	KCCR/OHD-067	F	56			ASHANTI	Asymptomatic	negative	999	Ghanaian
1526	KCCR/OHD-068	M	1	999	999	ASHANTI	Asymptomatic	negative	999	Ghanaian
1527	KCCR/OHD-069	F	55			ASHANTI	Asymptomatic	negative	999	Ghanaian
1528	KCCR/OHD-070	F	63			ASHANTI	Asymptomatic	negative	999	Ghanaian
1529	KCCR/OHD-071	F	53			ASHANTI	Asymptomatic	negative	999	Ghanaian
1530	KCCR/OHD-072	F	31			ASHANTI	Asymptomatic	negative	999	Ghanaian
1531	KCCR/OHD-073	F	21			ASHANTI	Asymptomatic	negative	999	Ghanaian
1532	KCCR/OHD-074	F	37			ASHANTI	Asymptomatic	negative	999	Ghanaian
1533	KCCR/OHD-075	M	37			ASHANTI	Asymptomatic	negative	999	Ghanaian
1534	KCCR/OHD-076	M	51			ASHANTI	Asymptomatic	negative	999	Ghanaian
1535	KCCR/OHD-077	M	27			ASHANTI	Asymptomatic	negative	999	Ghanaian
1536	KCCR/OHD-078	F	47			ASHANTI	Asymptomatic	negative	999	Ghanaian
1537	KCCR/OHD-079	M	26			ASHANTI	Asymptomatic	negative	999	Ghanaian
1538	KCCR/OHD-080	F	25			ASHANTI	Asymptomatic	negative	999	Ghanaian
1539	KCCR/OHD-081	M	37			ASHANTI	Asymptomatic	negative	999	Ghanaian
1540	KCCR/OHD-082	M	29			ASHANTI	Asymptomatic	negative	999	Ghanaian
1541	KCCR/OHD-083	F	29			ASHANTI	Asymptomatic	negative	999	Ghanaian
1542	KCCR/OHD-084	F	41			ASHANTI	Asymptomatic	negative	999	Ghanaian
1543	KCCR/OHD-085	M	56			ASHANTI	Asymptomatic	negative	999	Ghanaian
1544	KCCR/OHD-086	M	25			ASHANTI	Asymptomatic	negative	999	Ghanaian
1545	KCCR/KWE-001	M	27			ASHANTI	Asymptomatic	negative	999	Foreigner
1546	KCCR/KWE-002	M	25			ASHANTI	Asymptomatic	negative	999	Foreigner
1547	KCCR/KWE-003	M	24			ASHANTI	Asymptomatic	negative	999	Foreigner
1548	KCCR/KWE-004	M	22			ASHANTI	Asymptomatic	negative	999	Foreigner
1549	KCCR/KWE-005	M	31			ASHANTI	Asymptomatic	negative	999	Foreigner
1550	KCCR/KWE-006	M	20			ASHANTI	Asymptomatic	negative	999	Foreigner
1551	KCCR/KWE-007	M	25			ASHANTI	Asymptomatic	negative	999	Foreigner
1552	KCCR/KWE-008	M	27			ASHANTI	Asymptomatic	negative	999	Foreigner
1553	KCCR/KWE-009	M	-999			ASHANTI	Asymptomatic	negative	999	Ghanaian
1554	KCCR/KWE-010	F	-999			ASHANTI	Asymptomatic	negative	999	Ghanaian
1555	KCCR/AMP-020	F	56			ASHANTI	Asymptomatic	negative	999	Ghanaian
1556	KCCR/AMP-021	M	40			ASHANTI	Asymptomatic	negative	999	Ghanaian
1557	KCCR/AMP-022	F	-999			ASHANTI	Asymptomatic	negative	999	Ghanaian
1558	KCCR/AMP-023	F	30			ASHANTI	Asymptomatic	negative	999	Ghanaian
1559	KCCR/AMP-024	F	74			ASHANTI	Asymptomatic	negative	999	Ghanaian
1560	KCCR/AMP-025	F	45			ASHANTI	Asymptomatic	negative	999	Ghanaian
1561	KCCR/AMP-026	F	36			ASHANTI	Asymptomatic	negative	999	Ghanaian
1562	KCCR/AMP-027	M	38			ASHANTI	Asymptomatic	negative	999	Ghanaian
1563	KCCR/AMP-028	F	55			ASHANTI	Asymptomatic	negative	999	Ghanaian
1564	KCCR/AMP-029	M	50			ASHANTI	Asymptomatic	negative	999	Ghanaian
1565	KCCR/AMP-030	M	19			ASHANTI	Asymptomatic	negative	999	Ghanaian
1566	KCCR/AMP-031	F	48			ASHANTI	Asymptomatic	negative	999	Ghanaian
1567	KCCR/AMP-032	F	30			ASHANTI	History of fever,general weakness,cough,sore throat,headache	negative	999	Ghanaian
1568	KCCR/AMP-033	F	-999			ASHANTI	Asymptomatic	negative	999	Ghanaian
1569	KCCR/OFM-059	F	76			ASHANTI	Asymptomatic	negative	999	Ghanaian
1570	KCCR/OFM-060	M	81			ASHANTI	Asymptomatic	negative	999	Ghanaian
1571	KCCR/OFM-061	F	18			ASHANTI	Asymptomatic	negative	999	Ghanaian
1572	KCCR/OFM-062	M	44			ASHANTI	Asymptomatic	negative	999	Ghanaian
1573	KCCR/OFM-063	F	43			ASHANTI	Asymptomatic	negative	999	Ghanaian
1574	KCCR/OFM-064	M	23			ASHANTI	Asymptomatic	negative	999	Ghanaian
1575	KCCR/OFM-065	M	58			ASHANTI	Asymptomatic	negative	999	Ghanaian
1576	KCCR/OFM-066	M	54			ASHANTI	Asymptomatic	negative	999	Ghanaian
1577	KCCR/OFM-067	F	52			ASHANTI	Asymptomatic	negative	999	Ghanaian
1578	KCCR/OFM-068	M	51			ASHANTI	Asymptomatic	negative	999	Ghanaian
1579	KCCR/OFM-069	M	41			ASHANTI	Asymptomatic	negative	999	Ghanaian
1580	KCCR/OFM-070	F	36			ASHANTI	Asymptomatic	negative	999	Ghanaian
1581	KCCR/OFM-071	M	65			ASHANTI	Asymptomatic	negative	999	Ghanaian
1582	KCCR/OFM-072	M	28			ASHANTI	Asymptomatic	negative	999	Ghanaian
1583	KCCR/OFM-073	F	26			ASHANTI	Asymptomatic	negative	999	Ghanaian
1584	KCCR/OFM-074	M	24			ASHANTI	Asymptomatic	negative	999	Ghanaian
1585	KCCR/OFM-075	M	69			ASHANTI	Asymptomatic	negative	999	Ghanaian
1586	KCCR/OFM-076	M	25			ASHANTI	Asymptomatic	negative	999	Ghanaian
1587	KCCR/OFM-077	F	54			ASHANTI	Asymptomatic	negative	999	Ghanaian
1588	KCCR/OFM-078	M	22			ASHANTI	Asymptomatic	negative	999	Ghanaian
1589	KCCR/OFM-079	M	32			ASHANTI	Asymptomatic	negative	999	Ghanaian
1590	KCCR/OFM-080	M	37			ASHANTI	Asymptomatic	negative	999	Ghanaian
1591	KCCR/OFM-081	F	28			ASHANTI	Asymptomatic	negative	999	Ghanaian
1592	KCCR/OFM-082	M	48			ASHANTI	Asymptomatic	negative	999	Ghanaian
1593	KCCR/OFM-083	F	19			ASHANTI	Asymptomatic	negative	999	Ghanaian
1594	KCCR/OFM-084	M	55			ASHANTI	Asymptomatic	negative	999	Ghanaian
1595	KCCR/OFM-085	F	64			ASHANTI	Asymptomatic	negative	999	Ghanaian
1596	KCCR/OFM-086	M	37			ASHANTI	Asymptomatic	negative	999	Ghanaian
1597	KCCR/OFM-087	F	38			ASHANTI	no symptoms	negative	999	Ghanaian
1598	KCCR/OFM-088	F	33			ASHANTI	Asymptomatic	negative	999	Ghanaian
1599	KCCR/MDH-072	M	16			ASHANTI	Asymptomatic	negative	999	Ghanaian
1600	KCCR/MDH-073	F	42			ASHANTI	Asymptomatic	negative	999	Ghanaian
1601	KCCR/MDH-074	F	29			ASHANTI	Asymptomatic	negative	999	Ghanaian
1602	KCCR/MDH-075	M	29			ASHANTI	Asymptomatic	negative	999	Ghanaian
1603	KCCR/MDH-076	M	40			ASHANTI	Asymptomatic	negative	999	Ghanaian
1604	KCCR/MDH-077	F	74			ASHANTI	Asymptomatic	negative	999	Ghanaian
1605	KCCR/MDH-078	M	48			ASHANTI	Asymptomatic	negative	999	Ghanaian
1606	KCCR/MDH-079	M	72			ASHANTI	Asymptomatic	negative	999	Ghanaian
1607	KCCR/MDH-080	M	52			ASHANTI	Asymptomatic	negative	999	Ghanaian
1608	KCCR/MDH-081	M	57			ASHANTI	Asymptomatic	negative	999	Ghanaian
1609	KCCR/MDH-082	M	48			ASHANTI	Asymptomatic	negative	999	Ghanaian
1610	KCCR/MDH-083	F	55			ASHANTI	Asymptomatic	negative	999	Ghanaian
1611	KCCR/MDH-084	M	38			ASHANTI	Asymptomatic	negative	999	Ghanaian
1612	KCCR/MDH-085	M	34			ASHANTI	Asymptomatic	negative	999	Ghanaian
1613	KCCR/MDH-086	F	58			ASHANTI	Asymptomatic	negative	999	Ghanaian
1614	KCCR/MDH-087	F	55			ASHANTI	Asymptomatic	negative	999	Ghanaian
1615	KCCR/MDH-088	F	32			ASHANTI	Asymptomatic	negative	999	Ghanaian
1616	KCCR/MDH-089	F	25			ASHANTI	Asymptomatic	negative	999	Ghanaian
1617	KCCR/SUB-001	F	21			ASHANTI	Asymptomatic	negative	999	Ghanaian
1618	KCCR/SUB-002	F	51			ASHANTI	Asymptomatic	negative	999	Ghanaian
1619	KCCR/SUB-003	F	48			ASHANTI	Asymptomatic	negative	999	Ghanaian
1620	KCCR/SUB-004	M	39			ASHANTI	Asymptomatic	negative	999	Ghanaian
1621	KCCR/SUB-005	M	29			ASHANTI	Asymptomatic	negative	999	Ghanaian
1622	KCCR/SUB-006	M	52			ASHANTI	Asymptomatic	negative	999	Ghanaian
1623	KCCR/SUB-007	M	69			ASHANTI	Asymptomatic	POSITIVE	999	Ghanaian
1624	KCCR/SUB-008	F	38			ASHANTI	Asymptomatic	POSITIVE	999	Ghanaian
1625	KCCR/SUB-009	F	25			ASHANTI	Asymptomatic	POSITIVE	999	Ghanaian
1626	KCCR/SUB-010	F	28			ASHANTI	Asymptomatic	POSITIVE	999	Ghanaian
1627	KCCR/SUB-011	M	33			ASHANTI	Asymptomatic	negative	999	Ghanaian
1628	KCCR/SUB-012	F	14			ASHANTI	Asymptomatic	negative	999	Ghanaian
1629	KCCR/SUB-013	F	80			ASHANTI	Asymptomatic	negative	999	Ghanaian
1630	KCCR/SUB-014	F	58			ASHANTI	Asymptomatic	negative	999	Ghanaian
1631	KCCR/SUB-015	F	32			ASHANTI	Asymptomatic	negative	999	Ghanaian
1632	KCCR/SUB-016	F	46			ASHANTI	Asymptomatic	negative	999	Ghanaian
1633	KCCR/SUB-017	F	54			ASHANTI	Asymptomatic	negative	999	Ghanaian
1634	KCCR/SUB-018	M	67			ASHANTI	Asymptomatic	negative	999	Ghanaian
1635	KCCR/SUB-019	F	30			ASHANTI	Asymptomatic	negative	999	Ghanaian
1636	KCCR/SUB-020	F	55			ASHANTI	Asymptomatic	negative	999	Ghanaian
1637	KCCR/SUB-022	F	54			ASHANTI	Asymptomatic	negative	999	Ghanaian
1638	KCCR/SUB-023	F	23			ASHANTI	Asymptomatic	negative	999	Ghanaian
1639	KCCR/SUB-024	F	38			ASHANTI	Asymptomatic	negative	999	Ghanaian
1640	KCCR/SUB-025	M	18			ASHANTI	Asymptomatic	negative	999	Ghanaian
1641	KCCR/SUB-026	M	21			ASHANTI	Asymptomatic	negative	999	Ghanaian
1642	KCCR/SUB-027	F	61			ASHANTI	Asymptomatic	negative	999	Ghanaian
1643	KCCR/SUB-028	F	40			ASHANTI	Asymptomatic	negative	999	Ghanaian
1644	KCCR/SUB-029	F	42			ASHANTI	Asymptomatic	negative	999	Ghanaian
1645	KCCR/SUB-030	M	34			ASHANTI	Asymptomatic	negative	999	Ghanaian
1646	KCCR/SUB-031	M	27			ASHANTI	Asymptomatic	negative	999	Ghanaian
1647	KCCR/SUB-032	M	29			ASHANTI	Asymptomatic	negative	999	Ghanaian
1648	KCCR/SUB-033	F	35			ASHANTI	Asymptomatic	negative	999	Ghanaian
1649	KCCR/SUB-034	F	37			ASHANTI	Asymptomatic	negative	999	Ghanaian
1650	KCCR/SUB-035	M	22			ASHANTI	Asymptomatic	negative	999	Ghanaian
1651	KCCR/SUB-036	F	45			ASHANTI	Asymptomatic	negative	999	Ghanaian
1652	KCCR/SUB-037	F	18			ASHANTI	Asymptomatic	negative	999	Ghanaian
1653	KCCR/SUB-038	M	41			ASHANTI	Asymptomatic	negative	999	Ghanaian
1654	KCCR/SUB-039	M	14			ASHANTI	Asymptomatic	negative	999	Ghanaian
1655	KCCR/SUB-040	F	75			ASHANTI	Asymptomatic	negative	999	Ghanaian
1656	KCCR/SUB-041	M	56			ASHANTI	Asymptomatic	negative	999	Ghanaian
1657	KCCR/SUB-042	M	20			ASHANTI	Asymptomatic	negative	999	Ghanaian
1658	KCCR/SUB-043	F	21			ASHANTI	Asymptomatic	negative	999	Ghanaian
1659	KCCR/SUB-044	M	55			ASHANTI	Asymptomatic	negative	999	Ghanaian
1660	KCCR/SUB-045	F	25			ASHANTI	Asymptomatic	negative	999	Ghanaian
1661	KCCR/SUB-046	F	34			ASHANTI	Asymptomatic	negative	999	Ghanaian
1662	KCCR/SUB-047	M	30			ASHANTI	Asymptomatic	negative	999	Ghanaian
1663	KCCR/SUB-048	F	19			ASHANTI	Asymptomatic	negative	999	Ghanaian
1664	KCCR/SUB-049	M	50			ASHANTI	Asymptomatic	negative	999	Ghanaian
1665	KCCR/SUB-050	M	32			ASHANTI	Asymptomatic	negative	999	Ghanaian
1666	KCCR/SUB-051	M	38			ASHANTI	Asymptomatic	negative	999	Ghanaian
1667	KCCR/SUB-052	M	23			ASHANTI	Asymptomatic	negative	999	Ghanaian
1668	KCCR/SUB-053	F	49			ASHANTI	Asymptomatic	negative	999	Ghanaian
1669	KCCR/SUB-054	F	59			ASHANTI	Asymptomatic	negative	999	Ghanaian
1670	KCCR/SUB-055	F	72			ASHANTI	Asymptomatic	negative	999	Ghanaian
1671	KCCR/SUB-056	F	66			ASHANTI	Asymptomatic	negative	999	Ghanaian
1672	KCCR/SUB-057	F	26			ASHANTI	Asymptomatic	negative	999	Ghanaian
1673	KCCR/SUB-058	F	30			ASHANTI	Asymptomatic	negative	999	Ghanaian
1674	KCCR/SUB-059	M	28			ASHANTI	Asymptomatic	negative	999	Ghanaian
1675	KCCR/SUB-060	M	36			ASHANTI	Asymptomatic	negative	999	Ghanaian
1676	KCCR/SUB-061	M	17			ASHANTI	Asymptomatic	negative	999	Ghanaian
1677	KCCR/SUB-062	M	45			ASHANTI	Asymptomatic	negative	999	Ghanaian
1678	KCCR/SUB-063	F	20			ASHANTI	Asymptomatic	negative	999	Ghanaian
1679	KCCR/SUB-064	F	42			ASHANTI	Asymptomatic	negative	999	Ghanaian
1680	KCCR/SUB-065	F	37			ASHANTI	Asymptomatic	negative	999	Ghanaian
1681	KCCR/SUB-066	M	24			ASHANTI	Asymptomatic	negative	999	Ghanaian
1682	KCCR/SUB-067	M	54			ASHANTI	Asymptomatic	negative	999	Ghanaian
1683	KCCR/SUB-068	M	23			ASHANTI	Asymptomatic	negative	999	Ghanaian
1684	KCCR/SUB-069	M	26			ASHANTI	Asymptomatic	negative	999	Ghanaian
1685	KCCR/SUB-070	F	24			ASHANTI	Asymptomatic	negative	999	Ghanaian
1686	KCCR/SUB-071	F	24			ASHANTI	Asymptomatic	negative	999	Ghanaian
1687	KCCR/SUB-072	M	53			ASHANTI	Asymptomatic	negative	999	Ghanaian
1688	KCCR/SUB-073	F	43			ASHANTI	Asymptomatic	negative	999	Ghanaian
1689	KCCR/SUB-074	M	36			ASHANTI	Asymptomatic	negative	999	Ghanaian
1690	KCCR/SUB-075	F	17			ASHANTI	Asymptomatic	negative	999	Ghanaian
1691	KCCR/SUB-076	F	30			ASHANTI	Asymptomatic	negative	999	Ghanaian
1692	KCCR/SUB-077	M	25			ASHANTI	Asymptomatic	negative	999	Ghanaian
1693	KCCR/SUB-078	F	26			ASHANTI	Asymptomatic	negative	999	Ghanaian
1694	KCCR/SUB-079	F	40			ASHANTI	Asymptomatic	negative	999	Ghanaian
1695	KCCR/SUB-080	M	15			ASHANTI	Asymptomatic	negative	999	Ghanaian
1696	KCCR/SUB-081	M	51			ASHANTI	Asymptomatic	negative	999	Ghanaian
1697	KCCR/SUB-082	M	22			ASHANTI	Asymptomatic	negative	999	Ghanaian
1698	KCCR/SUB-083	F	18			ASHANTI	Asymptomatic	negative	999	Ghanaian
1699	KCCR/SUB-084	F	20			ASHANTI	Asymptomatic	negative	999	Ghanaian
1700	KCCR/SUB-085	M	21			ASHANTI	Asymptomatic	negative	999	Ghanaian
1701	KCCR/SUB-086	F	90			ASHANTI	Asymptomatic	negative	999	Ghanaian
1702	KCCR/SUB-087	F	34			ASHANTI	Asymptomatic	negative	999	Ghanaian
1703	KCCR/SUB-088	M	33			ASHANTI	Asymptomatic	negative	999	Ghanaian
1704	KCCR/SUB-089	F	23			ASHANTI	Asymptomatic	negative	999	Ghanaian
1705	KCCR/SUB-090	F	36			ASHANTI	Asymptomatic	negative	999	Ghanaian
1706	KCCR/SUB-091	F	63			ASHANTI	Asymptomatic	negative	999	Ghanaian
1707	KCCR/SUB-092	M	25			ASHANTI	Asymptomatic	negative	999	Ghanaian
1708	KCCR/SUB-093	M	37			ASHANTI	Asymptomatic	negative	999	Ghanaian
1709	KCCR/SUB-094	F	35			ASHANTI	Asymptomatic	negative	999	Ghanaian
1710	KCCR/SUB-095	M	31			ASHANTI	Asymptomatic	negative	999	Ghanaian
1711	KCCR/SUB-096	M	38			ASHANTI	Asymptomatic	negative	999	Ghanaian
1712	KCCR/SUB-097	F	58			ASHANTI	Asymptomatic	negative	999	Ghanaian
1713	KCCR/SUB-098	M	24			ASHANTI	Asymptomatic	negative	999	Ghanaian
1714	KCCR/SUB-099	F	22			ASHANTI	Asymptomatic	negative	999	Ghanaian
1715	KCCR/SUB-100	F	53			ASHANTI	Asymptomatic	negative	999	Ghanaian
1716	KCCR/SUB-101	F	60			ASHANTI	Asymptomatic	negative	999	Ghanaian
1717	KCCR/SUB-102	M	28			ASHANTI	Asymptomatic	negative	999	Ghanaian
1718	KCCR/SUB-103	F	22			ASHANTI	Asymptomatic	negative	999	Ghanaian
1720	KCCR/OFM-090	F	40			ASHANTI	Asymptomatic	POSITIVE	999	Ghanaian
1721	KCCR/OFM-091	M	-999			ASHANTI	Asymptomatic	POSITIVE	999	Ghanaian
1722	KCCR/OFM-092	M	32			ASHANTI	Asymptomatic	negative	999	Ghanaian
1723	KCCR/OFM-093	F	13			ASHANTI	Asymptomatic	negative	999	Ghanaian
1724	KCCR/OFM-094	M	12			ASHANTI	Asymptomatic	negative	999	Ghanaian
1725	KCCR/OFM-095	F	39			ASHANTI	Asymptomatic	negative	999	Ghanaian
1726	KCCR/OFM-096	F	16			ASHANTI	Asymptomatic	negative	999	Ghanaian
1727	KCCR/OFM-097	F	73			ASHANTI	Asymptomatic	negative	999	Ghanaian
1728	KCCR/OFM-098	F	5			ASHANTI	Asymptomatic	negative	999	Ghanaian
1729	KCCR/OFM-099	F	21			ASHANTI	Asymptomatic	negative	999	Ghanaian
1730	KCCR/OFM-100	M	43			ASHANTI	Asymptomatic	negative	999	Ghanaian
1731	KCCR/OFM-101	M	8			ASHANTI	Asymptomatic	negative	999	Ghanaian
1732	KCCR/OFM-102	M	43			ASHANTI	Asymptomatic	negative	999	Ghanaian
1733	KCCR/SGH-088	M	25			ASHANTI	History of fever, general weakness, cough, shortness of breath, nausea, headache	negative	999	Ghanaian
1813	KCCR/BOS-039	F	40			ASHANTI	Asymptomatic	negative	999	Ghanaian
18987	KCCR/SGH-1499	M	22			ASHANTI	no symptoms	negative	999	Ghanaian
18949	KCCR/SGH-1461	M	22			ASHANTI	Asymptomatic	negative	999	Ghanaian
72255	KCCR/SGH-3880	F	38			ASHANTI	General weakness	POSITIVE	36.09	Ghanaian
12116	KCCR/SGH-1120	F	50			ASHANTI	Asymptomatic	negative	999	Ghanaian
42086	KCCR/SGH-2534	F	63			ASHANTI	Asymptomatic	negative	999	Ghanaian
51927	KCCR/SGH-2745	F	50			ASHANTI	Sore throat	negative	999	Ghanaian
10879	KCCR/SGH-826	F	37			ASHANTI	Asymptomatic	negative	999	Ghanaian
3204	KCCR/SGH-173	F	43			ASHANTI	Asymptomatic	negative	999	Ghanaian
25594	KCCR/SGH-1706A	F	27			ASHANTI	Asymptomatic	negative	999	Ghanaian
26868	KCCR/SGH-1874	F	41			ASHANTI	Asymptomatic	negative	999	Ghanaian
5797	KCCR/SGH-553	F	64			ASHANTI	Asymptomatic	negative	999	Ghanaian
5782	KCCR/SGH-538	F	25			ASHANTI	Asymptomatic	negative	999	Ghanaian
26841	KCCR/SGH-1847	F	33			ASHANTI	Asymptomatic	negative	999	Ghanaian
4383	KCCR/SGH-478	F	39			ASHANTI	Asymptomatic	negative	999	Ghanaian
67144	KCCR/SGH-3525	F	20			ASHANTI	General weakness	negative	999	Ghanaian
50936	KCCR/SGH-2730	F	19			ASHANTI	Asymptomatic	negative	999	Ghanaian
12044	KCCR/SGH-1048	F	67			ASHANTI	Asymptomatic	negative	999	Ghanaian
26828	KCCR/SGH-1834	F	25			ASHANTI	General weakness	negative	999	Ghanaian
23877	KCCR/SGH-1677	M	30			ASHANTI	Asymptomatic	negative	999	Ghanaian
53983	KCCR/SGH-2765	F	80			ASHANTI	Shortness of breath	negative	999	Ghanaian
7299	KCCR/SGH-631	F	30			ASHANTI	Asymptomatic	negative	999	Ghanaian
32402	KCCR/SGH-2211	F	48			ASHANTI	Asymptomatic	negative	999	Ghanaian
18932	KCCR/SGH-1444	F	36			ASHANTI	Asymptomatic	negative	999	Ghanaian
11683	KCCR/SGH-1015	M	40			ASHANTI	Asymptomatic	negative	999	Ghanaian
26893	KCCR/SGH-1899	M	56			ASHANTI	Asymptomatic	negative	999	Ghanaian
5730	KCCR/SGH-486	M	52			ASHANTI	Asymptomatic	negative	999	Ghanaian
69984	KCCR/SGH-3716	M	35			ASHANTI	Asymptomatic	negative	999	Ghanaian
32381	KCCR/SGH-2190	M	50			ASHANTI	Asymptomatic	negative	999	Ghanaian
5805	KCCR/SGH-561	F	20			ASHANTI	Asymptomatic	negative	999	Ghanaian
3407	KCCR/SGH-376	F	78			ASHANTI	Asymptomatic	negative	999	Ghanaian
12100	KCCR/SGH-1104	F	14			ASHANTI	Asymptomatic	negative	999	Ghanaian
65101	KCCR/SGH-3454	F	22			ASHANTI	Asymptomatic	negative	999	Ghanaian
39908	KCCR/SGH-2452	F	31			ASHANTI	Asymptomatic	negative	999	Ghanaian
42081	KCCR/SGH-2529	F	17			ASHANTI	Asymptomatic	negative	999	Ghanaian
39657	KCCR/SGH-2275	F	21			ASHANTI	Asymptomatic	negative	999	Ghanaian
4332	KCCR/SGH-427	F	41			ASHANTI	Asymptomatic	negative	999	Ghanaian
3377	KCCR/SGH-346	F	67			ASHANTI	joint pain	negative	999	Ghanaian
18972	KCCR/SGH-1484	F	30			ASHANTI	Asymptomatic	negative	999	Ghanaian
72258	KCCR/SGH-3883	F	38			ASHANTI	Sore throat	POSITIVE	17.14	Ghanaian
63123	KCCR/SGH-3347	M	45			ASHANTI	Asymptomatic	negative	999	Ghanaian
55846	KCCR/SGH-2788	F	4			ASHANTI	Asymptomatic	negative	999	Ghanaian
48505	KCCR/SGH-2679	F	13			ASHANTI	Asymptomatic	negative	999	Ghanaian
23838	KCCR/SGH-1638	M	23			ASHANTI	Asymptomatic	negative	999	Ghanaian
60766	KCCR/SGH-3059	F	25			ASHANTI	Asymptomatic	negative	999	Ghanaian
62116	KCCR/SGH-3268	M	50			ASHANTI	History of fever/chills, general weakness,cough, shortness of breath,nausea/vomiting, headache, muscular, chest and joint pain	POSITIVE	26.29	Ghanaian
1803	KCCR/SGH-158	F	21			ASHANTI	Asymptomatic	negative	999	Ghanaian
58404	KCCR/SGH-2865	F	25			ASHANTI	Headache	negative	999	Ghanaian
59795	KCCR/SGH-2979	M	52			ASHANTI	Asymptomatic	negative	999	Ghanaian
66133	KCCR/SGH-3491	F	28			ASHANTI	Asymptomatic	POSITIVE	19.13	Ghanaian
23856	KCCR/SGH-1656	M	30			ASHANTI	Asymptomatic	negative	999	Ghanaian
60799	KCCR/SGH-3092	M	33			ASHANTI	Asymptomatic	negative	999	Ghanaian
66152	KCCR/SGH-3510	M	26			ASHANTI	Sore throat,runny nose	POSITIVE	17.09	Ghanaian
15801	KCCR/SGH-1246	M	25			ASHANTI	no symptoms	negative	999	Ghanaian
59829	KCCR/SGH-3013	M	24			ASHANTI	Asymptomatic	POSITIVE	34.73	Ghanaian
4365	KCCR/SGH-460	M	29			ASHANTI	Asymptomatic	negative	999	Ghanaian
23889	KCCR/SGH-1689	M	25			ASHANTI	Asymptomatic	negative	999	Ghanaian
61474	KCCR/SGH-3201	F	24			ASHANTI	Asymptomatic	POSITIVE	27.36	Ghanaian
15693	KCCR/SGH-1138	M	24			ASHANTI	Asymptomatic	negative	999	Ghanaian
65092	KCCR/SGH-3445	M	53			ASHANTI	Cough,sore throat	negative	999	Ghanaian
53982	KCCR/SGH-2764	M	31			ASHANTI	Cough,sore throat,shortness of breath	negative	999	Ghanaian
15790	KCCR/SGH-1235	M	29			ASHANTI	no symptoms	negative	999	Ghanaian
15705	KCCR/SGH-1150	M	20			ASHANTI	Asymptomatic	negative	999	Ghanaian
15758	KCCR/SGH-1203	M	20			ASHANTI	no symptoms	negative	999	Ghanaian
67158	KCCR/SGH-3539	M	43			ASHANTI	Asymptomatic	negative	999	Ghanaian
59835	KCCR/SGH-3019	M	49			ASHANTI	Asymptomatic	POSITIVE	34.78	Ghanaian
1814	KCCR/BOS-040	M	-999			ASHANTI	Cough	negative	999	Ghanaian
1815	KCCR/BOS-041	M	52			ASHANTI	General weakness/ History of fever	negative	999	Ghanaian
1816	KCCR/BOS-042	M	13			ASHANTI	Cough/ Headache	negative	999	Ghanaian
1817	KCCR/BOS-043	M	55			ASHANTI	Cough	negative	999	Ghanaian
1818	KCCR/BOS-044	F	54			ASHANTI	Cough	negative	999	Ghanaian
1819	KCCR/BOS-045	M	27			ASHANTI	Asymptomatic	negative	999	Ghanaian
1820	KCCR/BOS-046	F	58			ASHANTI	Asymptomatic	negative	999	Ghanaian
1821	KCCR/BOS-047	F	39			ASHANTI	Cough	negative	999	Ghanaian
1822	KCCR/BOS-048	F	-999			ASHANTI	Cough	negative	999	Ghanaian
1823	KCCR/BOS-049	F	72			ASHANTI	Cough	negative	999	Ghanaian
1824	KCCR/BOS-050	M	35			ASHANTI	Cough	negative	999	Ghanaian
1825	KCCR/BOS-051	M	35			ASHANTI	Cough	negative	999	Ghanaian
1826	KCCR/BOS-052	F	26			ASHANTI	Asymptomatic	negative	999	Ghanaian
1827	KCCR/BOS-053	F	35			ASHANTI	Asymptomatic	negative	999	Ghanaian
1828	KCCR/BOS-054	M	88			ASHANTI	Cough	negative	999	Ghanaian
1829	KCCR/BOS-055	F	16			ASHANTI	Cough	negative	999	Ghanaian
1830	KCCR/BOS-056	F	17			ASHANTI	Cough	negative	999	Ghanaian
1831	KCCR/BOS-057	M	30			ASHANTI	Cough	negative	999	Ghanaian
1832	KCCR/BOS-058	F	51			ASHANTI	Cough	negative	999	Ghanaian
1833	KCCR/BOS-059	F	27			ASHANTI	Cough	negative	999	Ghanaian
1834	KCCR/BOS-060	M	27			ASHANTI	Cough	negative	999	Ghanaian
1835	KCCR/BOS-061	F	15			ASHANTI	Cough	negative	999	Ghanaian
1836	KCCR/BOS-062	M	53			ASHANTI	Asymptomatic	negative	999	Ghanaian
1837	KCCR/BOS-063	F	24			ASHANTI	History of fever/ General Weakness/ Runny nose/ Nausea/ Headache	negative	999	Ghanaian
1838	KCCR/BOS-064	F	16			ASHANTI	Cough	negative	999	Ghanaian
1839	KCCR/ASK-082	M	22			ASHANTI	Sore throat/ Shortness of breath	negative	999	Ghanaian
1840	KCCR/ASK-083	F	14			ASHANTI	Asymptomatic	negative	999	Ghanaian
1841	KCCR/ASK-084	M	33			ASHANTI	Asymptomatic	negative	999	Ghanaian
1842	KCCR/ASK-085	M	63			ASHANTI	Asymptomatic	negative	999	Ghanaian
1843	KCCR/ASK-086	F	62			ASHANTI	Asymptomatic	negative	999	Ghanaian
1844	KCCR/ASK-087	M	26			ASHANTI	Asymptomatic	negative	999	Ghanaian
1845	KCCR/ASK-088	M	24			ASHANTI	Asymptomatic	negative	999	Ghanaian
1846	KCCR/ASK-089	F	31			ASHANTI	Asymptomatic	negative	999	Ghanaian
1847	KCCR/ASK-090	M	35			ASHANTI	Asymptomatic	negative	999	Ghanaian
1848	KCCR/ASK-091	F	58			ASHANTI	Asymptomatic	negative	999	Ghanaian
1849	KCCR/ASK-092	F	26			ASHANTI	Sore throat	negative	999	Ghanaian
1850	KCCR/ASK-093	M	27			ASHANTI	Asymptomatic	negative	999	Ghanaian
1851	KCCR/ASK-094	M	24			ASHANTI	Asymptomatic	negative	999	Ghanaian
1852	KCCR/ASK-095	F	54			ASHANTI	Asymptomatic	negative	999	Ghanaian
1853	KCCR/ASK-096	F	40			ASHANTI	Asymptomatic	negative	999	Ghanaian
1854	KCCR/ASK-097	F	38			ASHANTI	Asymptomatic	negative	999	Ghanaian
1855	KCCR/ASK-098	M	30			ASHANTI	Running Nose/ Headache	POSITIVE	999	Ghanaian
1856	KCCR/ASK-099	F	20			ASHANTI	Asymptomatic	negative	999	Ghanaian
1857	KCCR/ASK-100	F	17			ASHANTI	Asymptomatic	negative	999	Ghanaian
1858	KCCR/ASK-101	F	33			ASHANTI	Asymptomatic	negative	999	Ghanaian
1859	KCCR/ASK-102	M	43			ASHANTI	Asymptomatic	negative	999	Ghanaian
1860	KCCR/ASK-103	F	11			ASHANTI	Asymptomatic	negative	999	Ghanaian
1861	KCCR/ASK-104	M	13			ASHANTI	Asymptomatic	negative	999	Ghanaian
1862	KCCR/ASK-105	M	17			ASHANTI	Asymptomatic	negative	999	Ghanaian
1863	KCCR/ASK-106	F	14			ASHANTI	Asymptomatic	negative	999	Ghanaian
1864	KCCR/ASK-107	F	76			ASHANTI	Asymptomatic	negative	999	Ghanaian
1865	KCCR/ASK-108	M	35			ASHANTI	Asymptomatic	negative	999	Ghanaian
1866	KCCR/ASK-109	F	56			ASHANTI	Asymptomatic	negative	999	Ghanaian
1867	KCCR/ASK-110	F	47			ASHANTI	Asymptomatic	negative	999	Ghanaian
1868	KCCR/MDH-090	F	24			ASHANTI	Asymptomatic	negative	999	Ghanaian
1869	KCCR/MDH-091	F	32			ASHANTI	Asymptomatic	negative	999	Ghanaian
1870	KCCR/MDH-092	F	68			ASHANTI	Asymptomatic	negative	999	Ghanaian
1871	KCCR/MDH-093	F	15			ASHANTI	Asymptomatic	negative	999	Ghanaian
1872	KCCR/MDH-094	M	85			ASHANTI	Asymptomatic	negative	999	Ghanaian
1873	KCCR/MDH-095	M	54			ASHANTI	Asymptomatic	negative	999	Ghanaian
1874	KCCR/MDH-096	F	37			ASHANTI	Asymptomatic	negative	999	Ghanaian
1875	KCCR/MDH-097	F	25			ASHANTI	Asymptomatic	negative	999	Ghanaian
1876	KCCR/MDH-098	F	29			ASHANTI	Asymptomatic	negative	999	Ghanaian
1877	KCCR/MDH-099	F	35			ASHANTI	Asymptomatic	negative	999	Ghanaian
1878	KCCR/MDH-100	F	38			ASHANTI	Asymptomatic	negative	999	Ghanaian
1879	KCCR/MDH-101	M	51			ASHANTI	Asymptomatic	negative	999	Ghanaian
1880	KCCR/MDH-102	F	40			ASHANTI	Asymptomatic	negative	999	Ghanaian
1881	KCCR/MDH-103	F	56			ASHANTI	Asymptomatic	negative	999	Ghanaian
1882	KCCR/MDH-104	F	27			ASHANTI	Asymptomatic	negative	999	Ghanaian
1883	KCCR/MDH-105	F	33			ASHANTI	Asymptomatic	negative	999	Ghanaian
1884	KCCR/MDH-106	F	24			ASHANTI	Asymptomatic	negative	999	Ghanaian
1885	KCCR/MDH-107	F	31			ASHANTI	Asymptomatic	negative	999	Ghanaian
1886	KCCR/MDH-108	F	49			ASHANTI	Asymptomatic	negative	999	Ghanaian
1887	KCCR/MDH-109	F	59			ASHANTI	Asymptomatic	negative	999	Ghanaian
1888	KCCR/MDH-110	M	23			ASHANTI	Asymptomatic	negative	999	Ghanaian
1889	KCCR/MDH-111	M	25			ASHANTI	Asymptomatic	negative	999	Ghanaian
1890	KCCR/MDH-112	m	58			ASHANTI	Asymptomatic	negative	999	Ghanaian
1891	KCCR/MDH-113	F	40			ASHANTI	Asymptomatic	negative	999	Ghanaian
1892	KCCR/MDH-114	M	34			ASHANTI	Asymptomatic	negative	999	Ghanaian
1893	KCCR/MDH-115	M	45			ASHANTI	Asymptomatic	negative	999	Ghanaian
1894	KCCR/MDH-116	F	45			ASHANTI	Asymptomatic	negative	999	Ghanaian
1895	KCCR/MDH-117	F	36			ASHANTI	Asymptomatic	negative	999	Ghanaian
1896	KCCR/MDH-118	F	23			ASHANTI	Asymptomatic	negative	999	Ghanaian
1897	KCCR/MDH-119	F	30			ASHANTI	Asymptomatic	negative	999	Ghanaian
1898	KCCR/MDH-120	F	28			ASHANTI	Asymptomatic	negative	999	Ghanaian
1899	KCCR/MDH-121	F	28			ASHANTI	Asymptomatic	negative	999	Ghanaian
1900	KCCR/MDH-122	M	28			ASHANTI	Asymptomatic	negative	999	Ghanaian
1901	KCCR/MDH-123	F	25			ASHANTI	Asymptomatic	negative	999	Ghanaian
1902	KCCR/MDH-124	F	30			ASHANTI	Asymptomatic	negative	999	Ghanaian
1903	KCCR/MDH-125	M	28			ASHANTI	Asymptomatic	negative	999	Ghanaian
1904	KCCR/MDH-126	F	26			ASHANTI	Asymptomatic	negative	999	Ghanaian
1905	KCCR/MDH-127	F	40			ASHANTI	Asymptomatic	negative	999	Ghanaian
1906	KCCR/MDH-128	F	32			ASHANTI	Asymptomatic	negative	999	Ghanaian
1907	KCCR/MDH-129	M	28			ASHANTI	Asymptomatic	negative	999	Ghanaian
1908	KCCR/MDH-130	F	28			ASHANTI	Asymptomatic	negative	999	Ghanaian
1909	KCCR/MDH-131	M	30			ASHANTI	Asymptomatic	negative	999	Ghanaian
1910	KCCR/MDH-132	F	22			ASHANTI	Asymptomatic	negative	999	Ghanaian
1911	KCCR/MDH-133	F	47			ASHANTI	Cough/ occasional sneezing/ Regular Tiredness	negative	999	Ghanaian
1912	KCCR/MDH-134	F	55			ASHANTI	Asymptomatic	negative	999	Ghanaian
1913	KCCR/KSH-426	F	24			ASHANTI	Asymptomatic	negative	999	Ghanaian
1914	KCCR/KSH-427	F	17			ASHANTI	Asymptomatic	negative	999	Ghanaian
1915	KCCR/KSH-428	F	43			ASHANTI	Asymptomatic	negative	999	Ghanaian
1916	KCCR/KSH-429	F	35			ASHANTI	History of fever/ General weakness/ Headache/ Pain	negative	999	Ghanaian
1917	KCCR/KSH-430	F	41			ASHANTI	Asymptomatic	negative	999	Ghanaian
1918	KCCR/KSH-431	M	43			ASHANTI	Asymptomatic	negative	999	Ghanaian
1919	KCCR/KSH-432	M	33			ASHANTI	Asymptomatic	negative	999	Ghanaian
1920	KCCR/KSH-433	F	33			ASHANTI	Asymptomatic	negative	999	Ghanaian
1921	KCCR/KSH-434	M	18			ASHANTI	Asymptomatic	negative	999	Ghanaian
1922	KCCR/KSH-435	M	26			ASHANTI	Asymptomatic	negative	999	Ghanaian
1923	KCCR/KSH-436	M	25			ASHANTI	Asymptomatic	negative	999	Ghanaian
1924	KCCR/KSH-437	F	37			ASHANTI	Asymptomatic	negative	999	Ghanaian
1925	KCCR/KSH-438	M	52			ASHANTI	Asymptomatic	negative	999	Ghanaian
1926	KCCR/KSH-439	M	53			ASHANTI	Asymptomatic	negative	999	Ghanaian
1927	KCCR/KSH-440	M	35			ASHANTI	Asymptomatic	negative	999	Ghanaian
1928	KCCR/KSH-441	M	15			ASHANTI	Asymptomatic	negative	999	Ghanaian
1929	KCCR/KSH-442	M	49			ASHANTI	Asymptomatic	negative	999	Ghanaian
1930	KCCR/KSH-443	F	33			ASHANTI	Asymptomatic	negative	999	Ghanaian
1931	KCCR/KSH-444	M	37			ASHANTI	Asymptomatic	negative	999	Ghanaian
1932	KCCR/KSH-445	F	45			ASHANTI	Asymptomatic	negative	999	Ghanaian
1933	KCCR/KSH-446	F	33			ASHANTI	Asymptomatic	negative	999	Ghanaian
1934	KCCR/KSH-447	F	27			ASHANTI	Asymptomatic	negative	999	Ghanaian
1935	KCCR/KSH-448	M	22			ASHANTI	Asymptomatic	negative	999	Ghanaian
1936	KCCR/KSH-449	M	40			ASHANTI	Asymptomatic	negative	999	Ghanaian
1937	KCCR/KSH-450	F	38			ASHANTI	Asymptomatic	negative	999	Ghanaian
1938	KCCR/KSH-451	F	55			ASHANTI	Diarrhoea	negative	999	Ghanaian
1939	KCCR/KSH-452	F	22			ASHANTI	Asymptomatic	negative	999	Ghanaian
1940	KCCR/KSH-453	M	30			ASHANTI	Asymptomatic	negative	999	Ghanaian
1941	KCCR/KSH-454	F	74			ASHANTI	Headache/ History of fever	negative	999	Ghanaian
1942	KCCR/KSH-455	F	50			ASHANTI	Running Nose/ Headache/ Pain	negative	999	Ghanaian
1943	KCCR/KSH-456	F	60			ASHANTI	Asymptomatic	negative	999	Ghanaian
1944	KCCR/KSH-457	F	65			ASHANTI	History of fever/ Cough	negative	999	Ghanaian
1945	KCCR/KSH-458	F	21			ASHANTI	History of fever/ Cough/ Pain-Chest	negative	999	Ghanaian
1946	KCCR/KSH-459	F	43			ASHANTI	Asymptomatic	negative	999	Ghanaian
1947	KCCR/KSH-460	M	23			ASHANTI	Asymptomatic	negative	999	Ghanaian
1948	KCCR/KSH-461	M	24			ASHANTI	Asymptomatic	negative	999	Ghanaian
1949	KCCR/KSH-462	M	18			ASHANTI	Asymptomatic	negative	999	Ghanaian
1950	KCCR/KSH-463	M	18			ASHANTI	Asymptomatic	negative	999	Ghanaian
1951	KCCR/KSH-464	M	43			ASHANTI	Asymptomatic	negative	999	Ghanaian
1952	KCCR/KSH-465	M	31			ASHANTI	Asymptomatic	negative	999	Ghanaian
1953	KCCR/KSH-466	M	28			ASHANTI	Asymptomatic	negative	999	Ghanaian
1954	KCCR/KSH-467	F	34			ASHANTI	Asymptomatic	negative	999	Ghanaian
1955	KCCR/KSH-468	F	25			ASHANTI	History of fever/ Cough/ Sore throat/ Runny Nose/ Headache/Pain-Abdominal	negative	999	Ghanaian
1956	KCCR/KSH-469	F	47			ASHANTI	Asymptomatic	negative	999	Ghanaian
1957	KCCR/KSH-470	F	17			ASHANTI	Asymptomatic	negative	999	Ghanaian
1958	KCCR/KSH-471	F	15			ASHANTI	Asymptomatic	negative	999	Ghanaian
1959	KCCR/KSH-472	F	28			ASHANTI	Asymptomatic	negative	999	Ghanaian
1960	KCCR/KSH-473	M	28			ASHANTI	Asymptomatic	negative	999	Ghanaian
1961	KCCR/KSH-474	M	31			ASHANTI	Asymptomatic	negative	999	Ghanaian
1962	KCCR/KSH-475	M	29			ASHANTI	Asymptomatic	negative	999	Ghanaian
1963	KCCR/KSH-476	F	60			ASHANTI	Cough	negative	999	Ghanaian
1964	KCCR/KSH-477	F	60			ASHANTI	History of fever, shortness of breath	negative	999	Ghanaian
1965	KCCR/KSH-478	M	10			ASHANTI	Asymptomatic	negative	999	Ghanaian
1966	KCCR/KSH-479	M	31			ASHANTI	Asymptomatic	negative	999	Ghanaian
1967	KCCR/KSH-480	F	36			ASHANTI	Asymptomatic	negative	999	Ghanaian
1968	KCCR/KSH-481	M	12			ASHANTI	Asymptomatic	negative	999	Ghanaian
1969	KCCR/AMP-034	M	40			ASHANTI	Asymptomatic	negative	999	Ghanaian
1970	KCCR/AMP-035	M	43			ASHANTI	Asymptomatic	negative	999	Ghanaian
1971	KCCR/AMP-036	M	38			ASHANTI	cough	negative	999	Ghanaian
1972	KCCR/AMP-037	M	32			ASHANTI	Asymptomatic	negative	999	Ghanaian
1973	KCCR/AMP-038	F	40			ASHANTI	Asymptomatic	negative	999	Ghanaian
1974	KCCR/AMP-039	F	26			ASHANTI	Asymptomatic	negative	999	Ghanaian
1975	KCCR/AMP-040	F	30			ASHANTI	Asymptomatic	negative	999	Ghanaian
1976	KCCR/AMP-041	M	40			ASHANTI	Asymptomatic	negative	999	Ghanaian
1977	KCCR/AMP-042	M	19			ASHANTI	General weakness,cough,runny nose,diarrhoea,headache	negative	999	Ghanaian
1978	KCCR/AMP-043	M	17			ASHANTI	history of fever,general weakness,cough,diarrhoea,headache	negative	999	Ghanaian
1979	KCCR/KWA-014	M	29			ASHANTI	Asymptomatic	negative	999	Ghanaian
1980	KCCR/KWA-015	M	43			ASHANTI	Asymptomatic	negative	999	Ghanaian
1981	KCCR/KWA-016	M	36			ASHANTI	Asymptomatic	negative	-999	Ghanaian
1982	KCCR/KWA-017	F	35			ASHANTI	Asymptomatic	negative	-999	Ghanaian
1983	KCCR/KWA-018	F	42			ASHANTI	Asymptomatic	negative	-999	Ghanaian
1984	KCCR/KWA-019	M	36			ASHANTI	Asymptomatic	negative	-999	Ghanaian
1985	KCCR/KWA-020	M	39			ASHANTI	Asymptomatic	negative	-999	Ghanaian
1986	KCCR/KWA-021	F	65			ASHANTI	Asymptomatic	negative	-999	Ghanaian
1987	KCCR/KWA-022	M	20			ASHANTI	Asymptomatic	negative	-999	Ghanaian
1988	KCCR/KWA-023	F	52			ASHANTI	Asymptomatic	negative	-999	Ghanaian
1989	KCCR/KWA-024	F	23			ASHANTI	Asymptomatic	negative	-999	Ghanaian
1990	KCCR/KWA-025	M	20			ASHANTI	Asymptomatic	negative	-999	Ghanaian
1991	KCCR/KWA-026	M	22			ASHANTI	Asymptomatic	negative	-999	Ghanaian
1992	KCCR/KWA-027	M	-999			ASHANTI	Asymptomatic	negative	-999	Ghanaian
1993	KCCR/KWA-028	F	23			ASHANTI	Asymptomatic	negative	-999	Ghanaian
1994	KCCR/KWA-029	F	25			ASHANTI	Asymptomatic	negative	-999	Ghanaian
1995	KCCR/KWA-030	F	25			ASHANTI	Asymptomatic	negative	-999	Ghanaian
1996	KCCR/KWA-031	F	16			ASHANTI	Asymptomatic	negative	-999	Ghanaian
1997	KCCR/KWA-032	F	-999			ASHANTI	Asymptomatic	negative	-999	Ghanaian
1998	KCCR/KWA-033	F	54			ASHANTI	Asymptomatic	negative	-999	Ghanaian
1-999	KCCR/KWA-034	F	59			ASHANTI	Asymptomatic	negative	-999	Ghanaian
2000	KCCR/KWA-035	F	52			ASHANTI	Asymptomatic	negative	-999	Ghanaian
2001	KCCR/KWA-036	M	32			ASHANTI	Asymptomatic	negative	-999	Ghanaian
2002	KCCR/KWA-037	M	21			ASHANTI	Asymptomatic	negative	-999	Ghanaian
2003	KCCR/KWA-038	M	32			ASHANTI	Asymptomatic	negative	-999	Ghanaian
2004	KCCR/KWA-039	M	21			ASHANTI	Asymptomatic	negative	-999	Ghanaian
2005	KCCR/KWA-040	M	22			ASHANTI	Asymptomatic	negative	-999	Ghanaian
2006	KCCR/KWA-041	F	56			ASHANTI	Asymptomatic	negative	-999	Ghanaian
2007	KCCR/KWA-042	M	25			ASHANTI	Asymptomatic	negative	-999	Ghanaian
2008	KCCR/KWA-043	F	40			ASHANTI	Asymptomatic	negative	-999	Ghanaian
2009	KCCR/KWA-044	M	29			ASHANTI	Asymptomatic	negative	-999	Ghanaian
2010	KCCR/KWA-045	F	66			ASHANTI	Asymptomatic	POSITIVE	-999	Ghanaian
2011	KCCR/KWA-046	M	34			ASHANTI	Asymptomatic	negative	-999	Ghanaian
2012	KCCR/KWA-047	M	50			ASHANTI	Asymptomatic	negative	-999	Ghanaian
2013	KCCR/KWA-048	M	33			ASHANTI	Asymptomatic	negative	-999	Ghanaian
2014	KCCR/KWA-049	F	34			ASHANTI	Asymptomatic	negative	-999	Ghanaian
2015	KCCR/KWA-050	M	40			ASHANTI	Asymptomatic	negative	-999	Ghanaian
2016	KCCR/KWA-051	F	77			ASHANTI	Asymptomatic	negative	-999	Ghanaian
2017	KCCR/KWA-052	F	-999			ASHANTI	Asymptomatic	negative	-999	Ghanaian
2018	KCCR/KWA-053	F	19			ASHANTI	Asymptomatic	negative	-999	Ghanaian
2019	KCCR/KWA-054	M	52			ASHANTI	history of fever,general weakness,cough,sore throat,shortness of breath	negative	-999	Ghanaian
2020	KCCR/KWA-055	F	66			ASHANTI	Asymptomatic	negative	-999	Ghanaian
2021	KCCR/KWA-056	F	39			ASHANTI	Asymptomatic	negative	-999	Ghanaian
2022	KCCR/OMA-006	M	19			ASHANTI	Asymptomatic	negative	-999	Ghanaian
2023	KCCR/OMA-007	M	-999			ASHANTI	Asymptomatic	negative	-999	Ghanaian
2024	KCCR/OMA-008	F	-999			ASHANTI	Asymptomatic	POSITIVE	-999	Ghanaian
2025	KCCR/OMA-009	M	-999			ASHANTI	Asymptomatic	negative	-999	Ghanaian
2026	KCCR/OMA-010	M	51			ASHANTI	Asymptomatic	negative	-999	Ghanaian
2027	KCCR/OMA-011	M	-999			ASHANTI	Asymptomatic	negative	-999	Ghanaian
2028	KCCR/OMA-012	M	17			ASHANTI	Asymptomatic	negative	-999	Ghanaian
2029	KCCR/OMA-013	M	-999			ASHANTI	Asymptomatic	negative	-999	Ghanaian
2030	KCCR/OMA-014	M	26			ASHANTI	Asymptomatic	negative	-999	Ghanaian
2031	KCCR/OMA-015	M	-999			ASHANTI	Asymptomatic	negative	-999	Ghanaian
[truncated: 70,439 more rows]
