# Supplementary material for: Epidemiological profile of SARS-CoV-2 among selected regions in Ghana: A cross-sectional retrospective study
Source: PLoS One. 2020 Dec 10;15(12):e0243711. doi: 10.1371/journal.pone.0243711 (PMC7728229; doi:10.1371/journal.pone.0243711)
Supplement: S2 File — (XLSX) [file pone.0243711.s002.xlsx]

## Sheet: Sheet1
Variable	Interpretation
No	Serial IDs
Lab ID	IDs of patients
Sex	Gender of patients; F = female, M = males
Age_year	Age of patients in years
Age_month	Age of patients in months
Age_days	Age of patients in days; -999 = missing values; 999 = missing values
Region	Region from where patient came from
Symptoms	Symptoms of patients
PCR_CoV	PCR Results of patients
Cycle_Threshold	Cycling Threshold of PCR restults for FAM
Country of Origin	Status of patient
** All missing values were coded -999 or 999
